# Supplementary material for: Transcriptional activity and epigenetic regulation of transposable elements in the symbiotic fungus Rhizophagus irregularis
Source: PubMed Central journal article supplement (PMC8647823; doi:10.1101/gr.275752.121), 2021-12
Supplement: supp_gr.275752.121_Supplemental_Material.pdf [file supp_gr.275752.121_Supplemental_Material.pdf]

## Supplemental Material

### Transcriptional activity and epigenetic regulation of transposable elements in the symbiotic fungus *Rhizophagus irregularis*

Dallaire A\*,<sup>1,2,3</sup>, Manley BF<sup>1,2,3</sup>, Wilkens M<sup>4</sup>, Bista I<sup>1,2,3</sup>, Quan C<sup>5</sup>, Evangelisti E<sup>5</sup>, Bradshaw CR<sup>1</sup>, Ramakrishna NB<sup>1,2</sup>, Schornack S<sup>5</sup>, Butter F<sup>4</sup>, Paszkowski U\*,<sup>#,6</sup>, Miska EA\*,<sup>#,1,2,3</sup>.

## Supplemental Tables

Supplemental Table S1. Differentially expressed TE subfamilies

Refer to Supplemental\_Table\_S1.xlsx

Supplemental Table S2. Expressed genes containing TEs or TE fragments

Refer to Supplemental\_Table\_S2.xlsx

Supplemental Table S3. Top 100 TEs closest to genes

Refer to Supplemental\_Table\_S3.xlsx

Supplemental Table S4. *R. irregularis* proteins detected by mass spectrometry

Refer to Supplemental\_Table\_S4.xlsx

Supplemental Table S5. Differentially expressed *R. irregularis* proteins

Refer to Supplemental\_Table\_S5.xlsx

Supplemental Table S6. Library sizes and statistics for RNA sequencing

| Sample             | Treatment       | Library type | Sequenced | After filter 1 (rRNA) | After filter 2 (carrot) | Genome-mapped (final) | % mapped/sequenced |
|--------------------|-----------------|--------------|-----------|-----------------------|-------------------------|-----------------------|--------------------|
| 0h_untreated_rep1  | N/A             | polyA+ RNA   | 24125647  | N/A                   | N/A                     | 23508030              | 97.44              |
| 0h_untreated_rep2  | N/A             |              | 33011313  | N/A                   | N/A                     | 32179428              | 97.48              |
| 0h_untreated_rep3  | N/A             |              | 26851644  | N/A                   | N/A                     | 26244797              | 97.74              |
| 0h_untreated_rep4  | N/A             |              | 26369676  | N/A                   | N/A                     | 25633962              | 97.21              |
| 24h_untreated_rep1 | N/A             |              | 27247136  | N/A                   | N/A                     | 26650424              | 97.81              |
| 24h_untreated_rep2 | N/A             |              | 26387409  | N/A                   | N/A                     | 25656478              | 97.23              |
| 24h_untreated_rep3 | N/A             |              | 22347632  | N/A                   | N/A                     | 21715194              | 97.17              |
| 24h_untreated_rep4 | N/A             |              | 23269202  | N/A                   | N/A                     | 22606030              | 97.15              |
| 24h_exudate_rep1   | N/A             |              | 26574357  | N/A                   | N/A                     | 25947202              | 97.64              |
| 24h_exudate_rep2   | N/A             |              | 19888102  | N/A                   | N/A                     | 19436642              | 97.73              |
| 24h_exudate_rep3   | N/A             |              | 25378856  | N/A                   | N/A                     | 24960105              | 98.35              |
| 24h_exudate_rep4   | N/A             |              | 30133916  | N/A                   | N/A                     | 29510144              | 97.93              |
| 48h_untreated_rep1 | N/A             |              | 23753967  | N/A                   | N/A                     | 23129238              | 97.37              |
| 48h_untreated_rep2 | N/A             |              | 25007133  | N/A                   | N/A                     | 24336942              | 97.32              |
| 48h_untreated_rep3 | N/A             |              | 24205949  | N/A                   | N/A                     | 23574174              | 97.39              |
| 48h_untreated_rep4 | N/A             |              | 24370474  | N/A                   | N/A                     | 23727093              | 97.36              |
| 48h_exudate_rep1   | N/A             |              | 21842200  | N/A                   | N/A                     | 21210960              | 97.11              |
| 48h_exudate_rep2   | N/A             |              | 24461144  | N/A                   | N/A                     | 23893645              | 97.68              |
| 48h_exudate_rep3   | N/A             |              | 23394216  | N/A                   | N/A                     | 22783627              | 97.39              |
| 48h_exudate_rep4   | N/A             |              | 24240754  | N/A                   | N/A                     | 23697761              | 97.76              |
| untreated_1_rep1   | Untreated       | Small RNA    | 8522362   | 3696746               | 3622866                 | 3076779               | 36.1               |
| untreated_1_rep2   | Untreated       |              | 6185038   | 2495283               | 2452731                 | 2155423               | 34.8               |
| untreated_1_rep3   | Untreated       |              | 3588142   | 1579416               | 1551398                 | 1293706               | 36.1               |
| untreated_1_rep4   | Untreated       |              | 4801539   | 1963194               | 1934168                 | 1702242               | 35.5               |
| oxidised_1_rep1    | NaIO4 oxidation |              | 6822688   | 6461768               | 6402968                 | 5169737               | 75.8               |
| oxidised_1_rep2    | NaIO4 oxidation |              | 3949947   | 3550293               | 3475205                 | 2476031               | 62.7               |
| oxidised_1_rep3    | NaIO4 oxidation |              | 5614904   | 5366018               | 5290671                 | 4018639               | 71.6               |
| oxidised_1_rep4    | NaIO4 oxidation |              | 5061822   | 4601743               | 4541242                 | 3603889               | 71.2               |
| untreated_2_rep1   | Untreated       |              | 13408373  | 2756044               | 2606783                 | 2579412               | 19.2               |
| untreated_2_rep2   | Untreated       |              | 17095895  | 4012182               | 3875113                 | 3821583               | 22.4               |
| untreated_2_rep3   | Untreated       |              | 19184550  | 4041787               | 4041787                 | 3950481               | 20.6               |
| column_2_rep1      | TRaPR column    |              | 1224718   | 886033                | 884682                  | 836745                | 68.3               |
| column_2_rep2      | TRaPR column    |              | 16027189  | 12188531              | 12168644                | 11494790              | 71.7               |
| column_2_rep3      | TRaPR column    |              | 12377676  | 9247436               | 9231218                 | 8716589               | 70.4               |

# Supplemental Figures

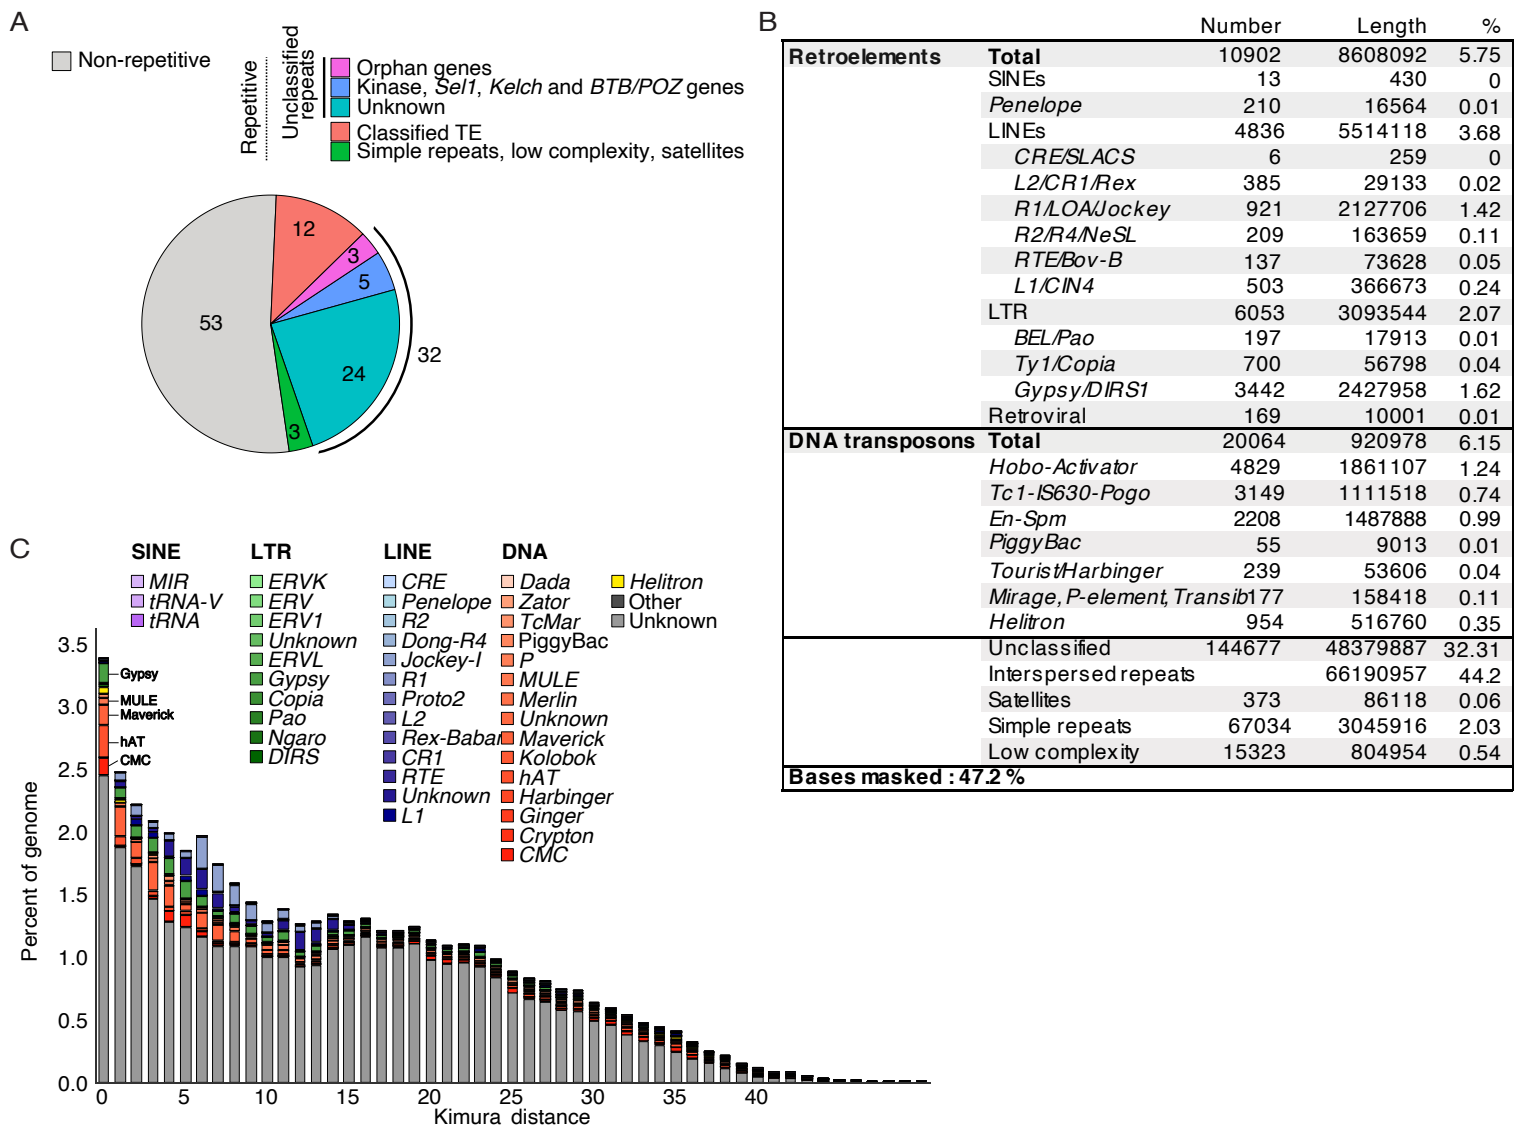

## Supplemental Figure S1. Transposon and repeat annotation

**A.** Summary of genome sequence composition (%). **B.** The composition (%) of major TE families in *R. irregularis*, alongside associated length and copy number. **C.** Kimura distance-based copy divergence analyses of transposable elements in *R. irregularis*. Graph represents genome coverage (%) for each TE superfamily plotted against Kimura distances of TEs (CpG adjusted *K-value* from 0 to 50). TE copies with a low Kimura distance value have a low divergence from the consensus sequence and may correspond to recent replication events. Sequences with a higher Kimura distance value corresponded to older divergence. Data displayed is the same as data used to produce Figure 1A, and also includes unknown/unclassified elements.

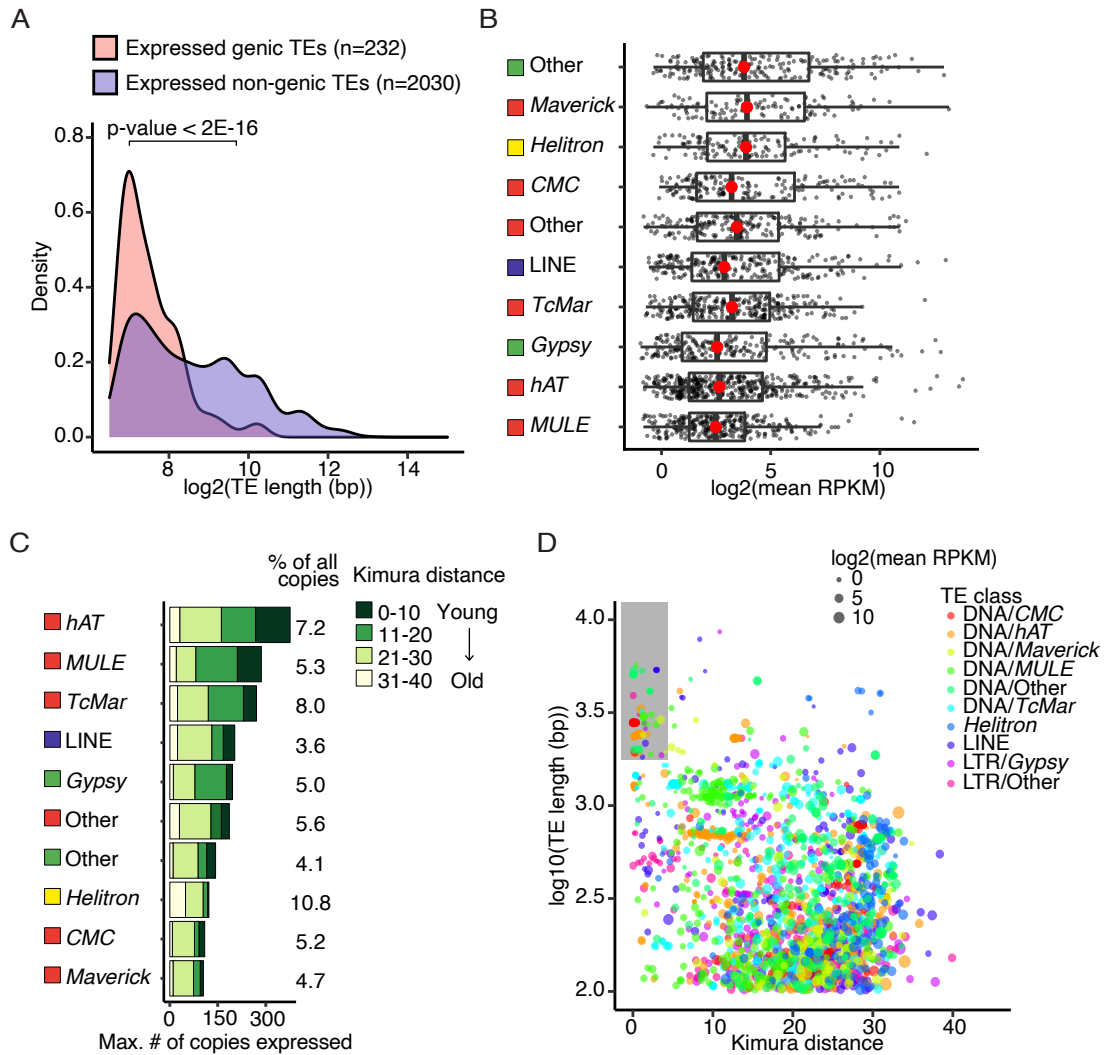

### Supplemental Figure S2. Transposon expression at individual loci

**A.** Density plot depicting log-transformed TE length of genic (pink) and non-genic (purple) expressed individual TE loci. Expressed TEs were classified as ‘genic’ when found overlapping with the coding region of expressed genes. Expressed TEs that did not overlap with the coding regions of expressed genes were classified as non-genic. **B.** Non-genic TE expression levels, grouped by superfamily. Boxplots represent interquartile ranges and red dots represent the medians of log<sub>2</sub> transformed mean RPKM across 20 samples (5 conditions, 4 replicates/condition). **C.** Number of expressed non-genic transposon copies of each super-family. Absolute TE numbers are displayed as percentage of expressed TEs compared to all TEs in the genome. Expressed TEs have been grouped into bins based on Kimura distance and hence relative age, represented using colour coding. **D.** Log-transformed length of all expressed TEs relative to divergence expressed as Kimura distance. Colour and point size indicate the TE class and log-transformed mean RPKM values respectively. Shaded area highlights TEs of >2kb length and <5% Kimura distance.

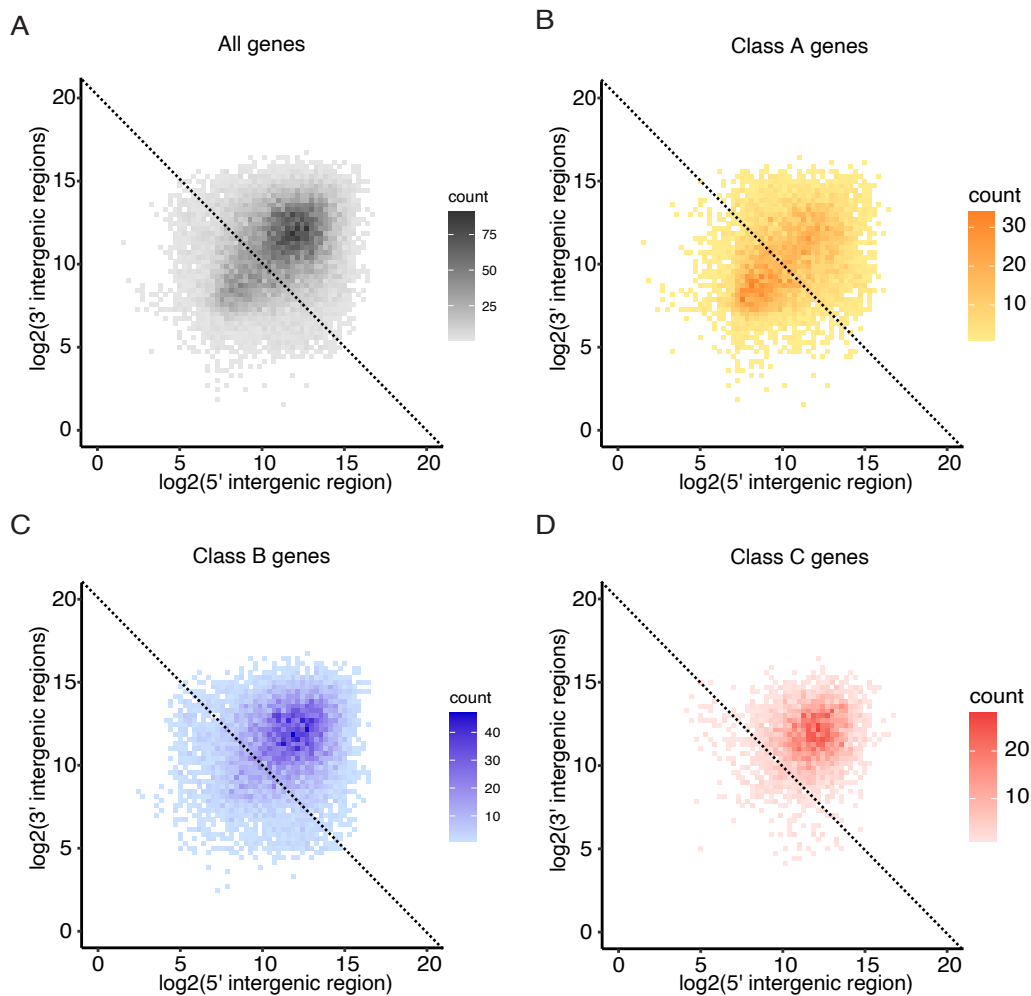

**Supplemental Figure S3.** Class-specific gene density in *R. irregularis*

Log-transformed intergenic distances upstream genes (5') is plotted against log-transformed intergenic distances downstream genes (3') for all genes (**A**), class A (**B**), class B (**C**) and class C (**D**) genes.

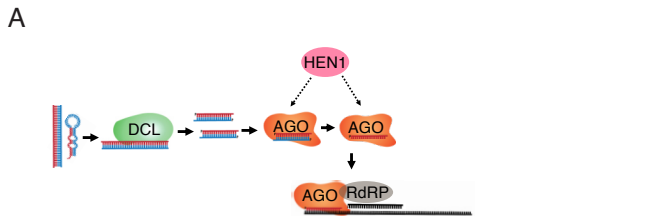

**B**

|          | Species                | DCL | AGO | HEN1 | RdRP |
|----------|------------------------|-----|-----|------|------|
| ECM      | Non-mycorrhizal        | 0-3 | 0-7 | 0-1  | 0-1  |
|          | <i>L. bicolor</i>      | 2   | 6   | 0    | 6    |
| Ericoid  | <i>T. melanosporum</i> | 2   | 3   | 0    | 2    |
|          | <i>M. bicolor</i>      | 1   | 10  | 0    | 3    |
| Orchid   | <i>P. ericae</i>       | 1   | 3   | 0    | 3    |
|          | <i>T. calospora</i>    | 1   | 9   | 0    | 3    |
| AMF      | <i>R. irregularis</i>  | 1   | 30  | 1    | 10   |
|          | <i>R. clarus</i>       | 2   | 28  | 1    | 10   |
|          | <i>G. cerebriforme</i> | 2   | 23  | 1    | 10   |
| Pathogen | <i>V. dahliae</i>      | 2   | 2   | 0    | 3    |
|          | <i>B. cinerea</i>      | 1   | 2   | 0    | 2    |
|          | <i>P. capsici</i>      | 1   | 5   | 0    | 1    |

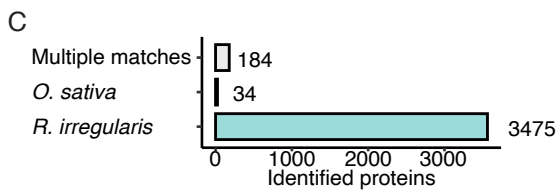

**D**

| Uniprot ID | Protein                   | Log2(LFQ) | Coverage(%) |
|------------|---------------------------|-----------|-------------|
| A0A2H5T0P1 | DCL                       | 23.3      | 7.7         |
| A0A2H5R501 | Argonaute binding protein | 25.0      | 14.4        |
| A0A2H5S4Q1 | Argonaute binding protein | 24.6      | 15.8        |
| A0A2H5S8K1 | Argonaute binding protein | 25.1      | 25.8        |
| A0A2H5R7T0 | Argonaute                 | 26.1      | 37.1        |
| A0A2H5R7X8 | Argonaute                 | 28.8      | 25.4        |
| A0A2H5R820 | Argonaute                 | 24.2      | 6.5         |
| A0A2H5SS29 | Argonaute                 | 28.6      | 42.2        |
| A0A2H5TEY9 | Argonaute                 | 24.9      | 16.8        |
| A0A2H5TEZ5 | Argonaute                 | 24.4      | 19.5        |
| A0A2H5TF38 | Argonaute                 | 26.8      | 31.9        |
| A0A2H5UB68 | Argonaute                 | 24.4      | 11.8        |
| A0A2H5UH87 | Argonaute                 | 30.9      | 59.9        |
| U9URB1     | Argonaute                 | 29.8      | 53.4        |
| U9SLB0     | HRR1 helicase             | 25.1      | 7.3         |
| A0A2H5TYD3 | STC1                      | 27.3      | 42.1        |
| A0A2H5R5H6 | HEN1                      | 23.3      | 1.9         |

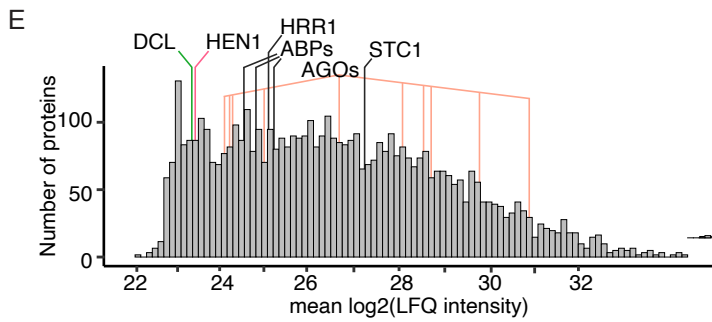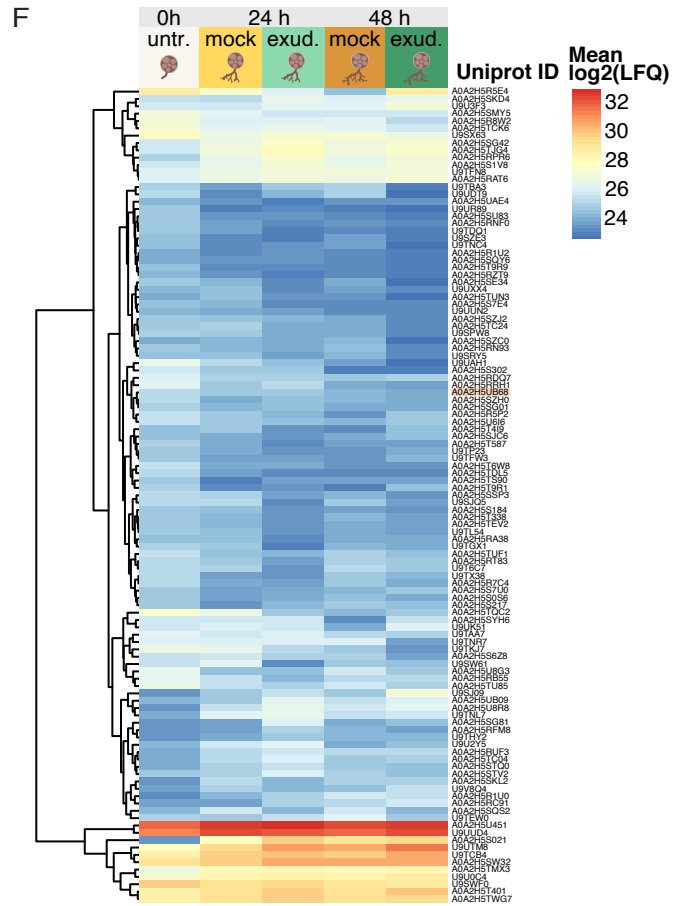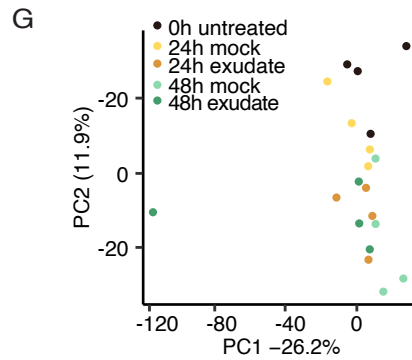

**H**

|              | Term name                         | Enriched GO terms | Term ID                | Padj |
|--------------|-----------------------------------|-------------------|------------------------|------|
| ↓24h exudate | Glycine import into mitochondrion | GO:1904983        | 4.998×10 <sup>-2</sup> |      |
|              | Glycine transmembrane transporter | GO:0015187        | 4.979×10 <sup>-2</sup> |      |
| ↓48h exudate | DNA replication initiation        | GO:0006270        | 4.543×10 <sup>-3</sup> |      |
|              | MCM complex                       | GO:0042555        | 1.218×10 <sup>-3</sup> |      |

**Supplemental Figure S4.** RNAi-related genes in *R. irregularis* and their expression

**A.** Schematic representation of a typical RNAi pathway. Double-stranded RNA or hairpin RNAs are cleaved by the RNase Dicer, generating sRNA duplexes. HEN1 methylates either the duplex or single-stranded sRNA loaded into AGO proteins. The sRNA-AGO complex then targets RNAs by base pairing. In some cases, RNA-dependent RNA polymerases (RdRPs) are recruited to facilitate silencing by using the target RNA as a template to generate more sRNA. **B.** Number of putative *DCL*, *AGO*, *HEN1* and *RdRP* genes found in genomes of species of mycorrhizal species: ectomycorrhizal (ECM), ericoid mycorrhiza, orchid mycorrhiza, arbuscular mycorrhiza (AMF) and pathogenic fungi capable of cross-kingdom sRNA transfer. **C.** Number of proteins identified by mass spectrometry matching to the proteomes of *R. irregularis*, *O. sativa* or both. **D.** Uniprot IDs, label-free quantitation (mean log-transformed LFQ intensities) and % unique coverage of RNAi pathway genes detected by proteomics. **E.** Distribution of LFQ intensity of proteins detected by mass spectrometry. Values for RNAi pathway proteins are indicated. **F.** Heatmap and hierarchical clustering of mean log-transformed LFQ intensities of differentially expressed *R. irregularis* proteins ( $|\Delta \log_2(\text{LFQ})| > 1.1$ ;  $\log_{10}(\text{P}_{adj}) > 1.1$ ) at 24h or 48h post-treatment with mock (Hoagland's; nutrient condition) or exudate (rice root exudates) treatment relative to control conditions (0h; no treatment). ID marked in orange is an Argonaute protein. **G.** Principal component analysis of protein expression across all replicates and treatments, 0h control, 24h mock and rice exudate treatments, and 48h mock and rice exudate treatment (20 samples total, at 4 replicates per treatment). **H.** Functional enrichment analysis of differentially expressed proteins using g:Profiler (Raudvere et al. 2019).
