# Supplementary material for: Transcriptional activity and epigenetic regulation of transposable elements in the symbiotic fungus Rhizophagus irregularis
Source: Genome Res. 2021 Dec;31(12):2290–302. doi: 10.1101/gr.275752.121 (PMC8647823; doi:10.1101/gr.275752.121)
Supplement: Supplemental Material [file supp_gr.275752.121_Supplemental_Table_S4.xlsx]

## Sheet: Sheet 1 - Table S3. R. irregula
Supplemental Table S4. R. irregularis proteins detected by mass spectrometry
Uniprot ID	Protein names	Gene names	Length	Mean.log2 (LFQ intensity)	Unique coverage(%)	Group
A0A2H5QYL7	Prolyl-tRNA synthetase (EC 6.1.1.15)	RIR_0005800	595	23.3013	6.2
A0A2H5QYN8	Signal recognition particle 54 kDa protein	GLOIN_2v1464482 RIR_0005500	518	27.0551	38.2
A0A2H5QYS2	Serine/threonine protein kinase	RIR_0012200	628	24.8251	12.9	Class C
A0A2H5QZ04	9-o-acetyl-n-acetylneuraminate esterase	RIR_0013500	1212	27.956	17.1
A0A2H5QZ37	C2 domain-containing protein	RIR_0022100	1296	23.2241	1.9
A0A2H5QZ45	Signal peptidase complex subunit 2	RIR_0023000	237	25.7372	22.4
A0A2H5QZ52	40S ribosomal protein S12	RIR_0022500	131	30.3645	51.1
A0A2H5QZ56	DUF262 domain-containing protein	RIR_0022600	364	23.3436	5.8
A0A2H5QZ58	Mitogen-activated protein kinase kinase 1 interacting protein 1	RIR_0023800	87	23.6286	21.8	Class C
A0A2H5QZ59	Pyrroline-5-carboxylate reductase (EC 1.5.1.2)	RIR_0024500	309	26.7175	29.8
A0A2H5QZ68	Chromatin structure-remodeling complex protein rsc7	RIR_0024700	949	22.9845	3.1
A0A2H5QZ81	Elongation factor G, mitochondrial (EF-Gmt) (Elongation factor G 1, mitochondrial) (mEF-G 1) (Elongation factor G1)	MEF1 RIR_0025300	711	25.6061	8.9
A0A2H5QZA5	Protein farnesyltransferase subunit beta (FTase-beta) (EC 2.5.1.58)	RIR_0024410	451	29.0229	36.4
A0A2H5QZJ2	Septin 3/9/12	RIR_0002400	347	28.5974	58.2
U9UQD1	Corrinoid adenosyltransferase (EC 2.5.1.17)	GLOIN_2v1494021 GLOINDRAFT_342899 RIR_0035400	213	27.1417	31
A0A2H5QZV9	Kinase-like domain-containing protein (Serine/threonine protein kinase)	GLOIN_2v1875565 RIR_0039700	438	25.5361	11.6	Class C
A0A2H5R0Z3	Cytochrome P450 monooxygenase	RIR_0076900 RIR_0084000	486	22.7632	38.1
A0A2H5R004	Glucuronosyltransferase (Glycosyltransferase family 1 protein)	GLOIN_2v1600607 RIR_0042600	585	26.5846	23.6
A0A2H5R035	Cbd9-like protein	RIR_0052100	388	26.1257	11.3
A0A2H5R058	Solute carrier family 25 (Mitochondrial phosphate transporter), member 23/24/25/41	RIR_0022900	495	26.9156	41.2
A0A2H5R072	Homoserine kinase (EC 2.7.1.39)	RIR_0023700	342	25.893	25.7
A0A2H5R077	Vacuolar import and degradation protein	GLOIN_2v1493129 RIR_0024600	765	26.7329	25.1
A0A2H5R096	Fad binding oxidoreductase	GLOIN_2v1862974 RIR_0051700	475	29.0275	54.7
A0A2H5R0A5	Vacuolar calcium ion transporter	RIR_0026000	453	26.6076	9.7
A0A2H5R0F6	Isopentenyl-diphosphate Delta-isomerase (EC 5.3.3.2)	GLOIN_2v1470965 RIR_0061400	234	29.4509	76.9
A0A2H5R0J4	Hamartin (Hamartin protein-domain-containing protein)	GLOIN_2v1470969 RIR_0061700	994	23.323	3.9
A0A2H5R0T2	Dipeptidyl-peptidase and tripeptidyl-peptidase	RIR_0070800	858	28.4584	31.9
A0A2H5R0W6	Long-chain acyl-CoA synthetase	GLOIN_2v1729288 RIR_0071000	555	28.0358	35.9
A0A2H5R0X0	Insulysin (Putative peptidase M16)	GLOIN_2v1701480 RIR_0075400	1051	29.4034	45.7
A0A2H5R194	Uncharacterized protein	RIR_0084700	308	26.8437	37.3
A0A2H5R1A1	ATP-dependent helicase	GLOIN_2v1595869 RIR_0085500	1380	27.6341	25.1
A0A2H5R1B2	Btb/poz domain-containing protein 9	RIR_0086100	471	25.8674	16.6	Class C
A0A2H5R1C1	Pro-resilin isoform x1	RIR_0086700	1486	25.3197	10.9
A0A2H5R1D3	Tyrosine--tRNA ligase (EC 6.1.1.1) (Tyrosyl-tRNA synthetase)	RIR_0088200	633	29.6043	50.7
A0A2H5R1D5	Inosine triphosphate pyrophosphatase (ITPase)	RIR_0087500	183	24.1948	19.1
A0A2H5R1E1	Acetyl-CoA C-acetyltransferase	RIR_0088700	233	29.9925	77.7
A0A2H5R1F5	Acetyl-CoA C-acetyltransferase	RIR_0088600	182	28.648	62.6
A0A2H5R1J4	Replication factor A2	GLOIN_2v1477780 RIR_0091300	283	24.6319	18.7
A0A2H5R1K8	Transcription initiation factor IIF subunit alpha	RIR_0094300	938	23.446	8.6
A0A2H5R1L0	Chloride channel protein, nucleotide-sensitive, 1a	GLOIN_2v1596721 RIR_0090100	261	27.0095	37.2
A0A2H5R1P8	Vam6/Vps39-like protein vacuolar protein sorting-associated protein 39	GLOIN_2v1633486 RIR_0098700	911	25.2079	8.9
A0A2H5R1Q3	Peptide-methionine (R)-S-oxide reductase (EC 1.8.4.12)	RIR_0098300	157	24.3867	36.3
A0A2H5R1Q8	Peroxidase (EC 1.11.1.-)	RIR_0099600	361	31.7597	53.5
A0A2H5R1R9	CDP-diacylglycerol-serine o-phosphatidyltransferase	RIR_0100300	207	25.39	11.1
A0A2H5R1S2	Acetoacetyl-CoA synthetase	RIR_0100000	271	25.0793	20.3
A0A2H5R1T6	Acetoacetyl-CoA synthetase	RIR_0099900	344	23.8035	27.3
A0A2H5R1T8	ATP-binding cassette, subfamily D (ALD), peroxisomal long-chain fatty acid import protein	RIR_0098600	716	28.4896	39.4
A0A2H5R1U0	Translation initiation factor eIF1	RIR_0101900	260	24.6096	12.3
A0A2H5R1U1	Glutaredoxin 3 (Glutaredoxin-1)	GLOIN_2v1633026 RIR_0101500	101	29.8348	66.3
A0A2H5R1U2	ER to Golgi transport-related protein	RIR_0101200	292	23.1005	8.6
A0A2H5R1U5	Actin cortical patch component lsb4	RIR_0099500	341	24.3815	17.3
A0A2H5R1U7	Spindle assembly checkpoint component MAD1	RIR_0100500	847	23.1801	8.3
A0A2H5R1X4	Nst UDP-galactose transporter	GLOIN_2v1633014 RIR_0101600	407	23.5905	6.6
A0A2H5R1X9	Superoxide dismutase, Fe-Mn family	RIR_0102700	321	24.5417	19.3
A0A2H5R249	Non-specific serine/threonine protein kinase (EC 2.7.11.1)	RIR_0109400 RIR_1919900 RIR_2295800	545	23.3055	8.3
A0A2H5R2E3	ATP-dependent (S)-NAD(P)H-hydrate dehydratase (EC 4.2.1.93) (ATP-dependent NAD(P)HX dehydratase)	RIR_0089900	327	27.5383	70
A0A2H5R2E9	Mitochondrial ribosomal protein subunit mrp21	RIR_0090600	134	23.2034	15.7
A0A2H5R2J1	Uncharacterized protein	GLOIN_2v1590969 RIR_0119600	405	23.123	6.9
A0A2H5R2M8	Peptide-methionine (S)-S-oxide reductase (EC 1.8.4.11)	GLOIN_2v1455244 RIR_0122800	171	27.5072	82.5
A0A2H5R2T4	Uncharacterized protein	RIR_0129000	1024	24.7176	8.1
A0A2H5R2Y3	GTPase imap family member 7-like	RIR_0132100	485	26.1189	20
A0A2H5UH04	Uncharacterized protein	RIR_3516900	113	25.7333	33.6
A0A2H5R381	DnaJ homolog subfamily B member 4	RIR_0141200	277	27.2004	35.7
A0A2H5R3E9	Karyopherin kap113	RIR_0148300	956	25.6943	11.5
A0A2H5R3I5	Aryl-alcohol dehydrogenase aad14	RIR_0123200	1434	24.9169	4.3
A0A2H5R3I8	Dnaj chaperone protein	RIR_0150400	416	26.4011	31
A0A2H5R3J4	Mitochondrial fusion and transport protein UGO1	RIR_0150000	386	27.1048	21.2
A0A2H5R3N3	Mitochondrial presequence protease	GLOIN_2v1528803 RIR_0153300	1016	29.2432	54
A0A2H5R4N9	Mediator of RNA polymerase II transcription subunit 6 (Mediator complex subunit 6)	MED6 RIR_0156700	257	25.3595	7.8
A0A2H5R3R0	Vacuolar acidification-related protein	RIR_0157300	1519	24.6287	5.9
A0A2H5R3R1	Pheromone processing carboxypeptidase Kex1	RIR_0157500	580	23.5243	6.7
A0A2H5R3R2	3-ketodihydrosphingosine reductase tsc10	RIR_0156800	361	26.0018	28.5
A0A2H5R3V1	Exocyst complex component EXO84	RIR_0160500	624	23.2382	5.1
A0A2H5R3V9	Adenylosuccinate lyase (ASL) (EC 4.3.2.2) (Adenylosuccinase)	RIR_0161500	482	27.6936	46.3
A0A2H5R3W4	Synaptobrevin/VAMP-like protein	RIR_0160600	262	28.1679	48.9
A0A2H5R3Z0	Low molecular weight phosphotyrosine protein phosphatase (Phosphotyrosine protein phosphatase I superfamily)	GLOIN_2v1529515 RIR_0162800	156	25.3739	51.3
A0A2H5R3Z2	Pre-mRNA-splicing factor ATP-dependent RNA helicase DHX15/PRP43	RIR_0163300	316	24.8005	22.5
A0A2H5R3Z3	Ribonuclease	RIR_0164000	265	26.4615	36.2
A0A2H5R3Z8	Conserved fungal protein	GLOIN_2v1765829 RIR_0162900	326	25.2671	16.9
A0A2H5R401	Eukaryotic translation initiation factor 2B, subunit 2	RIR_0163400	410	25.7899	16.3
A0A2H5R402	Uncharacterized protein	GLOIN_2v1715307 RIR_0164500	200	28.4465	52
A0A2H5R409	U2 small nuclear ribonucleoprotein B	GLOIN_2v1715271 RIR_0164900	256	26.3995	30.1
A0A2H5R412	Uncharacterized protein	RIR_0165000	260	23.6729	26.2
A0A2H5R419	Ubiquitin carboxyl-terminal hydrolase (EC 3.4.19.12)	RIR_0163000	810	27.1898	10.5
A0A2H5R454	Serine/threonine protein kinase	RIR_0169200	864	25.1215	23.7	Class C
A0A2H5R461	Ribosomal 60S subunit protein L32 (Ribosomal protein L32e)	GLOIN_2v1485741 RIR_0168800	133	29.7069	34.6
A0A2H5R462	DnaJ homolog subfamily B member 6	RIR_0169100	362	25.4517	17.4
A0A2H5R467	NADH dehydrogenase	GLOIN_2v1699067 RIR_0168700	68	23.5607	27.9
A0A2H5R469	Carboxypeptidase (EC 3.4.16.-)	GLOIN_2v1699204 RIR_0170300	511	28.6576	34.2
A0A2H5R470	Exocyst complex protein EXO70	RIR_0170800	591	23.1463	6.6
A0A2H5R472	Stomatin-like protein 2	RIR_0170000	350	27.9532	30.9
A0A2H5R487	Histone deacetylase complex protein Sin3	RIR_0171700	1184	25.961	15.7	Histone and histone modification
A0A2H5R490	RNA binding protein	RIR_0171500	282	29.1017	40.8
A0A2H5R4A7	CP2 transcription factor	RIR_0173500	547	24.8166	9.1
A0A2H5R4B2	Cop9 signalosome complex subunit 1	RIR_0174100	441	29.2175	60.3
A0A2H5R4D7	T-complex protein 1 subunit zeta	RIR_0176100	805	31.0164	38.6
A0A2H5R4D9	Glutamate dehydrogenase (NADP(+)) (EC 1.4.1.4)	RIR_0173100	460	27.5449	52
A0A2H5R4E0	40S ribosomal protein S18	RIR_0175800	161	31.9916	63.4
A0A2H5R4E9	Phosphoribosylglycinamide formyltransferase	RIR_0174000	201	26.1522	25.4
A0A2H5R4L1	Ribosomal protein	RIR_0181500	211	30.3112	43.6
A0A2H5R4L6	Small subunit ribosomal protein S36	GLOIN_2v1585571 RIR_0182600	98	26.1574	45.9
A0A2H5R4M6	DNA replication factor C subunit	RIR_0183500	254	26.1457	15.7
A0A2H5R4N0	Cyclophilin family peptidyl-prolyl cis-trans isomerase Cyp7 (Predicted)	GLOIN_2v1874324 RIR_0183100	576	24.2563	18.4
A0A2H5R4N2	ATP synthase F1, gamma subunit	RIR_0183900	269	30.5186	49.4
A0A2H5R4N4	Histone deacetylase 6	RIR_0184500	193	27.6646	43.5	Histone and histone modification
A0A2H5R4N5	Sphingolipid long chain base-responsive protein pil1	RIR_0184400	842	26.6816	24.9
A0A2H5R4N6	AP-1 complex subunit gamma	RIR_0183200	843	28.2212	24.1
A0A2H5R4N7	Mosc domain protein	RIR_0181700	297	24.851	10.1
A0A2H5R4P1	Endoglucanase (EC 3.2.1.4)	GLOIN_2v1454558 RIR_0184900	533	23.8272	7.7
U9TIE8	116 kDa U5 small nuclear ribonucleoprotein component (U5 snRNP-specific protein, 116 kDa)	GLOIN_2v1585534 GLOINDRAFT_336956 RIR_0182500	977	28.2796	33.8
A0A2H5R4Q0	Expressed protein	RIR_0157600	667	27.2306	33.3
A0A2H5R4Q7	Endonuclease/exonuclease/phosphatase family protein	GLOIN_2v1585850 RIR_0185600	291	29.2076	62.5
A0A2H5R4Q9	Integral peroxisomal membrane peroxin	RIR_0185100	500	26.4458	25.6
A0A2H5R4R0	Dihydropteridine reductase	RIR_0187100	215	28.5437	68.8
A0A2H5R4R3	26S proteasome regulatory subunit N8	RIR_0187200	325	28.8756	60
A0A2H5R4S9	Expressed protein	RIR_0187300	392	29.7481	32.9
A0A2H5R4S7	Cdc73 RNA polymerase II accessory factor	RIR_0187700	400	23.4589	9.5
A0A2H5R4T3	Calcineurin temperature suppressor cts1	RIR_0188800	386	25.0906	6.2
A0A2H5R4T8	Universal stress protein	RIR_0187800	173	26.1717	23.1
A0A2H5R4U3	Mediator of RNA polymerase II transcription subunit 1 (Mediator complex subunit 1)	RIR_0189800	713	24.8956	12.9
A0A2H5R4V5	Sterol binding ankyrin repeat protein	RIR_0161100	837	24.7108	12.8
A0A2H5R4W7	Glyoxalase II (EC 3.1.2.6)	RIR_0190800	303	24.5337	31.4
A0A2H5R4Y5	Pre-mRNA splicing factor	RIR_0163100	651	25.2117	18.6
A0A2H5R501	Argonaute binding protein 2	RIR_0195000	403	24.9983	11.2	RNAi-related
A0A2H5R504	NAD-dependent protein deacylase (EC 2.3.1.-) (Regulatory protein SIR2 homolog 5)	RIR_0164800	259	25.8506	45.2
A0A2H5R513	Dolichyl-diphosphooligosaccharide-protein glycotransferase	RIR_0165600	297	25.9652	18.2
A0A2H5R525	Dynein light chain Tctex-type 1 (Tctex-1 family-domain-containing protein)	GLOIN_2v1497197 RIR_0195600	156	26.2825	35.3
A0A2H5R5A3	UDP-glucose 6-dehydrogenase (EC 1.1.1.22)	GLOIN_2v1642255 RIR_0173600	467	31.5534	79
A0A2H5R5C7	Pep-cterm sorting domain-containing protein	RIR_0204000	631	26.7216	15.4
A0A2H5R5E4	Translation elongation factor 2	RIR_0206000	828	26.9222	4.2
A0A2H5R5F5	RNA binding protein Ligatin/Tma64	GLOIN_2v1654924 RIR_0205900	579	24.2795	15.4
A0A2H5R5F7	DNA-directed RNA polymerase II subunit RPB11	RIR_0207100	248	24.8387	21.4
A0A2H5R5G7	Carboxypeptidase (EC 3.4.16.-)	GLOIN_2v1879648 RIR_0206100	459	23.54	5.4
A0A2H5R5H4	S-(Hydroxymethyl)glutathione dehydrogenase / alcohol dehydrogenase	RIR_0207500	235	29.0961	57.4
A0A2H5R5H6	Carboxypeptidase s1 (HEN1 2’-O-methyltransferase)	RIR_0206200	1780	23.3652	1.3	RNAi-related
U9TBI4	Histone H3	GLOIN_2v1635297 GLOIN_2v1654812 GLOINDRAFT_336643 GLOINDRAFT_341556 RIR_1257300	136	29.9091	23.5	Histone and histone modification
A0A2H5R5J0	S-(Hydroxymethyl)glutathione dehydrogenase / alcohol dehydrogenase	RIR_0207600	92	27.1998	42.4
A0A2H5R5K8	Putative short chain dehydrogenase (Short chain dehydrogenase family protein)	GLOIN_2v1585600 RIR_0182900	300	30.1343	69.3
A0A2H5R5P2	Small G-protein Ras2	RIR_0185700	175	25.0721	20.6
A0A2H5R5P9	Non-specific serine/threonine protein kinase (EC 2.7.11.1)	RIR_0211300	742	26.6011	21.3
A0A2H5R5X3	Pre-mRNA-splicing factor ATP-dependent RNA helicase	RIR_0221600	1052	23.2374	8.8
A0A2H5R5X7	Acetyl-CoA C-acetyltransferase (Acetyl-CoA acetyltransferase)	GLOIN_2v1631710 RIR_0218600	396	29.0043	61.6
A0A2H5R5Y6	Espin	GLOIN_2v1842681 RIR_0221500	496	25.0429	11.7
A0A2H5R5Y9	Chitinase (EC 3.2.1.14)	RIR_0221900	681	26.8408	16.9
A0A2H5R614	Nucleoporin POM152	RIR_0194500	1210	25.1392	7.7
A0A2H5R689	Probable 2-oxoglutarate dehydrogenase E1 component DHKTD1	RIR_0231700	956	25.3581	7.7
A0A2H5R6B1	Large subunit ribosomal protein L45 (Putative 39S ribosomal protein L45)	GLOIN_2v1594669 RIR_0233600	288	24.2554	6.6
A0A2H5R6B4	Dolichyl-phosphate-mannose--protein mannosyltransferase (EC 2.4.1.109)	GLOIN_2v1829257 RIR_0232700	766	23.1452	3
A0A2H5R715	Putative endosomal spry domain protein	RIR_0254300	367	24.4	14.4
A0A2H5R725	Peptidyl-prolyl cis-trans isomerase (PPIase) (EC 5.2.1.8)	RIR_0255100	123	31.8799	41.5
A0A2H5R737	Ccaat box binding factor subunit c	RIR_0224500	351	23.6314	21.9
A0A2H5R750	U6 snRNA-associated Sm-like protein LSm1	LSM1 RIR_0256200	138	24.5493	29
A0A2H5R754	Guanosine-3',5'-bis(Diphosphate) 3'-pyrophosphohydrolase	GLOIN_2v1592302 RIR_0257400	197	28.0987	50.3
A0A2H5R762	Uncharacterized protein	RIR_0257500	702	25.9968	18.4
A0A2H5R778	SEL1 protein	RIR_0258800	1047	24.4773	6.9	Class C
A0A2H5R797	Choline dehydrogenase	RIR_0260400	607	24.6877	16.5
A0A2H5R7A1	Putative Ribosome assembly protein RRB1	RIR_0257800	802	26.156	16.1
A0A2H5R7C4	Alpha/beta superfamily hydrolase	GLOIN_2v1594573 RIR_0232710	297	23.8183	15.2
A0A2H5R7E7	Uncharacterized protein	RIR_0261600	278	26.4758	22.7
A0A2H5R7N2	Antiviral helicase SKI2	RIR_0272000	1327	24.8439	8.2
A0A2H5R7R8	ATP-dependent DNA helicase II subunit 1 (EC 3.6.4.12) (ATP-dependent DNA helicase II subunit Ku70)	RIR_0272200	640	27.4811	44.1
A0A2H5R7R9	Trehalase (EC 3.2.1.28) (Alpha-trehalose glucohydrolase)	RIR_0272600	740	26.5435	34.2
A0A2H5R7T0	Eukaryotic translation initiation factor 2C	RIR_0275000	866	28.0764	37.1	RNAi-related
A0A2H5R7X8	Eukaryotic translation initiation factor 2C	RIR_0276900	1414	28.7168	24.3	RNAi-related
A0A2H5R820	Eukaryotic translation initiation factor 2c 2	RIR_0281400	814	24.1734	6.5	RNAi-related
A0A2H5R872	Ubiquitin carboxyl-terminal hydrolase (EC 3.4.19.12)	GLOIN_2v1577652 RIR_0285800	492	29.4332	74.4
A0A2H5R874	40S ribosomal protein S0	RPS0 RIR_0286400	380	31.4019	29.7
A0A2H5R879	Acylglycerol-3-phosphate acyltransferase protein (Acyltransferase-domain-containing protein)	GLOIN_2v1577537 RIR_0285400	311	25.1773	26.4
A0A2H5R887	Uncharacterized protein	RIR_0286500	636	24.5063	8.3
A0A2H5R888	Ubiquitin-conjugating enzyme E2 D	RIR_0286900	147	26.8664	42.9
A0A2H5R889	Dynein light chain roadblock	GLOIN_2v1577674 RIR_0286200	103	26.2227	41.7
A0A2H5R894	Uncharacterized protein	GLOIN_2v1577753 RIR_0287800	129	24.8918	45
A0A2H5R896	Dolichyl-diphosphooligosaccharide--protein glycotransferase (EC 2.4.99.18)	RIR_0286600	646	26.5176	16.7
A0A2H5R8A1	DNA helicase (EC 3.6.4.12)	GLOIN_2v1771534 RIR_0288500	1004	23.2476	8.5
A0A2H5R8A2	Peroxin 26	RIR_0287900	399	23.333	9.5
A0A2H5R8B3	Protein VTS1	RIR_0288700	601	24.3518	15.6
A0A2H5R8C5	40S ribosomal protein S13 (Ribosomal 40S subunit protein S13)	GLOIN_2v1453866 RIR_0290100	151	30.5108	55
A0A2H5R8C6	Btb domain transcription factor	RIR_0289800	363	31.3825	60.3
A0A2H5R8D0	Duf866 domain protein	RIR_0290200	154	26.6348	45.5
A0A2H5R8D1	Upf0187 domain membrane protein	RIR_0289900	367	26.5938	22.6
A0A2H5R8D2	Integral peroxisomal membrane protein	RIR_0290500	442	26.0579	17.4
A0A2H5R8D8	Protein OS-9 homolog	RIR_0291500	672	26.2816	12.4
A0A2H5R8E0	Ariadne-1	RIR_0290800	267	26.5223	43.4
A0A2H5R8E6	Ariadne-1	RIR_0290900	187	26.5091	31
A0A2H5R8F2	Lem domain protein man1, sad1 interacting factor	GLOIN_2v1577934 RIR_0290700	581	23.3011	4.1
A0A2H5R8F7	Ribosomal 60S subunit protein L4 (Ribosomal 60S subunit protein L4A)	GLOIN_2v1727015 RIR_0293300	378	31.3152	46.6
A0A2H5R8H0	Mitogen-activated protein kinase (EC 2.7.11.24)	RIR_0293700	793	28.7703	24.3	Class C
A0A2H5R8J7	5'-nucleotidase	RIR_0296800	607	26.234	13.7
A0A2H5R8L9	XAP-5-like protein	RIR_0297000	314	23.0778	9.6
A0A2H5R8P1	Alternative oxidase (EC 1.-.-.-)	GLOIN_2v1626159 RIR_0299700	343	29.8588	47.5
A0A2H5R8R1	Ubiquitin domain-containing protein	RIR_0301200	317	26.3973	35.6
A0A2H5R8W2	DNA replication licensing factor MCM2 (EC 3.6.4.12)	GLOIN_2v1641403 RIR_0274900	893	25.0595	10.3
A0A2H5R908	von willebrand factor type a domain protein, partial	RIR_0309400	2073	23.6817	2.7
A0A2H5R9B1	Cytoskeleton-associated protein 5	RIR_0285700	1758	24.9937	8.5
A0A2H5R9K5	Spindle pole body component	RIR_0293200	879	23.6527	5.6
A0A2H5RA15	Dynactin 1	RIR_0340000	1276	28.1141	31.7
A0A2H5RA25	Phosphatidylinositol transfer protein	RIR_0340100	155	28.435	62.6
A0A2H5RA32	NADH dehydrogenase [ubiquinone] iron-sulfur protein 4, mitochondrial	RIR_0341200	152	27.5948	49.3
A0A2H5RA35	Phenylalanine--tRNA ligase (EC 6.1.1.20)	RIR_0340800	302	28.2648	67.5
A0A2H5RA38	Sugar phosphate phosphatase (EC 3.1.3.-)	RIR_0340400	277	23.8858	14.1
A0A2H5RA39	Phenylalanine-tRNA ligase, alpha subunit	RIR_0340700	178	27.5067	42.1
A0A2H5RA41	Pseudouridine 5'-phosphatase	RIR_0340500	261	26.0194	20.3
A0A2H5RA50	GTPase KRas	RIR_0341400	142	24.4672	26.1
A0A2H5RA96	6-phosphofructo-2-kinase/fructose-2, 6-bisphosphatase bifunctional enzyme	RIR_0346800	484	26.0743	19.6
A0A2H5RAA3	Kynurenine aminotransferase	RIR_0346900	430	29.0963	39.3
A0A2H5RAB3	Oxidoreductase, 2og-Fe(II) oxygenase family	RIR_0346400	292	26.7538	50.7
A0A2H5RAB7	Uncharacterized protein	RIR_0346600	267	25.5094	22.1
A0A2H5RAC3	Uncharacterized protein	RIR_0348800	278	23.3444	18
A0A2H5RAC8	Phosphoribosylaminoimidazole carboxylase ADE2	RIR_0349300	206	26.6238	57.8
A0A2H5RAD3	AIR carboxylase (EC 4.1.1.21) (Phosphoribosylaminoimidazole carboxylase)	RIR_0349200	282	26.4965	51.1
A0A2H5RAD5	Glycolipid transfer protein het-c2	RIR_0348100	216	27.9409	59.7
A0A2H5RAF4	Vacuolar protein sorting-associated protein 41	RIR_0349800	992	25.4035	15.8
A0A2H5RAJ0	Forkhead transcription factor	RIR_0353900	406	24.8059	17.5
A0A2H5RAK3	Kelch repeat protein	RIR_0353500	412	25.659	13.6	Class C
A0A2H5RAL7	Uncharacterized protein	RIR_0322900	824	29.2985	8.3
A0A2H5RAL9	Ure2p	RIR_0354800	243	23.7748	16.5
A0A2H5RAM8	Putative Ubiquitin C	RIR_0355600	734	27.8451	40.9
A0A2H5RAN9	Solute carrier family 25 (Mitochondrial carnitine/acylcarnitine transporter), member 20/29	RIR_0356800	283	26.33	23.7
A0A2H5RAP3	Histone H2A	RIR_0357400	233	30.7442	36.9	Histone and histone modification
A0A2H5RAQ7	S-adenosylmethionine synthase (EC 2.5.1.6)	RIR_0358600	366	30.7501	56.3
A0A2H5RAQ8	Fg-nucleoporin nup57	RIR_0358700	827	24.7963	7.9
A0A2H5RAS8	Glutathione S-transferase (Ure2p)	GLOIN_2v1508976 RIR_0360300	244	29.3795	36.5
A0A2H5RAS9	Ure2p	RIR_0360400	218	28.4888	42.7
A0A2H5RAT4	Ure2p	RIR_0361000	239	27.7543	31.8
A0A2H5RAT6	Uncharacterized protein	RIR_0361400	2365	26.4853	8.2
A0A2H5RAU2	Ure2p	RIR_0360700	243	24.375	7
A0A2H5RAU7	Activating signal cointegrator 1 complex subunit1	GLOIN_2v1509192 RIR_0362100	656	25.2799	16.3
A0A2H5RAV3	RNA-binding domain-containing protein	RIR_0362200	338	26.0753	21.3
A0A2H5RAX0	Copii-coated vesicle component	RIR_0363500	195	27.7553	44.6
A0A2H5RAX3	Ribosomal 60S subunit protein L16	RIR_0363600	181	30.3762	42
A0A2H5RAX4	Calcofluor white hypersensitive protein (Cell wall organization and biogenesis-related protein, putative)	GLOIN_2v1509320 RIR_0362900	954	25.19	5.9
A0A2H5RAZ1	Serine/threonine-protein kinase	RIR_0365400	569	28.2318	42	Class C
A0A2H5RB55	Protein kish	RIR_0340010	71	23.9489	25.4
A0A2H5RB71	Diaminopimelate epimerase	RIR_0369500	300	26.3155	53.3
A0A2H5RBF0	Putative WD repeat domain 5B	RIR_0349400	448	23.1811	5.1
A0A2H5RBH8	Crinkler family protein	RIR_0381300	197	23.9557	24.9	Putative effector
A0A2H5RBK6	Signal recognition particle subunit SRP72	RIR_0382500	669	27.9472	44.8
A0A2H5RBS8	Nicotinamide-nucleotide adenylyltransferase (EC 2.7.7.1)	RIR_0390300	275	25.5165	30.2
U9SZA1	RNA-binding protein	GLOIN_2v1503433 GLOINDRAFT_340629 RIR_0390700	196	24.7728	35.2
A0A2H5RBV1	Solute carrier family 25 (Mitochondrial carrier protein), member 16	RIR_0390400	352	24.0538	9.1
A0A2H5RC32	Cell surface protein, partial	RIR_0396800	225	23.8746	30.7
A0A2H5RC35	Ny-ren-24 antigen	RIR_0397600	820	23.2946	2.8
A0A2H5RC42	Serine/threonine-protein kinase TOR (EC 2.7.11.1)	GLOIN_2v1502997 RIR_0397700	2295	25.8072	10.1	Class C
A0A2H5RC45	Uricase (EC 1.7.3.3)	RIR_0397500	238	28.9283	55.5
A0A2H5RC90	Set domain-containing protein-lysine n-methyltransferase	GLOIN_2v1502738 RIR_0402100	301	30.1606	51.2
A0A2H5RC91	Uncharacterized protein	RIR_0401900	141	24.4067	39
A0A2H5RC99	Sequence orphan	GLOIN_2v1876708 RIR_0402900 RIR_1531800	474	25.1278	12.2
A0A2H5RCE2	zf-3CxxC domain-containing protein	RIR_0407600	374	23.0439	8.8
A0A2H5RCG2	Signal transducer	RIR_0407800	177	29.4	60.5
A0A2H5RCG6	Fad isoamyl alcohol oxidase protein	GLOIN_2v1656276 RIR_0408700	599	30.7397	61.6
A0A2H5RCG7	Methyltransferase type 11	RIR_0407900	323	25.5995	31
A0A2H5RCH7	Uncharacterized protein	GLOIN_2v1656378 RIR_0409300	202	23.5322	14.9
A0A2H5RJD1	Crinkler (Crn) family protein	RIR_0573300	910	23.3014	3.6	Putative effector
A0A2H5RCV6	Ubiquitin carboxyl-terminal hydrolase (EC 3.4.19.12)	RIR_0419200	965	25.0469	10.9
A0A2H5RCW2	Proliferating cell nuclear antigen	RIR_0421000	241	27.9967	46.1
A0A2H5RCW5	Regulator of nonsense transcripts 1	RIR_0420600	1063	26.3479	12.7
U9SUR4	Protein arginine n-methyltransferase	GLOINDRAFT_339952 RIR_0420700	338	28.0741	45.9
A0A2H5RD00	Cytochrome P450 (Cytochrome p450 monooxygenase)	GLOIN_2v1569109 RIR_0424200	536	23.1528	25.2
A0A2H5RD04	Uroporphyrinogen decarboxylase (EC 4.1.1.37)	RIR_0423400	381	28.9107	42.5
A0A2H5RD06	Septin-like protein spn3	RIR_0423800	348	27.0325	37.4
A0A2H5RD33	COP9 signalosome complex subunit 4	RIR_0426700	295	28.8017	47.8
A0A2H5RD34	Cellular morphogenesis-related protein	GLOIN_2v1569255 RIR_0425900	1854	23.8559	1.3
A0A2H5RD51	U3 small nucleolar RNA-associated protein 12	RIR_0428700	935	23.1423	8.2
A0A2H5RD53	Multifunctional beta-oxidation protein	RIR_0428600	969	32.8222	56.4
A0A2H5RD65	HSP20 family protein	RIR_0428500	230	32.546	40
A0A2H5RD67	Guanine nucleotide-binding protein G(I) subunit alpha	RIR_0397800	353	23.2251	9.3
A0A2H5RD69	Dihydrolipoamide acetyltransferase component of pyruvate dehydrogenase complex (EC 2.3.1.-)	RIR_0428800	437	27.2132	31.8
A0A2H5RD82	Uncharacterized protein	RIR_0430900	268	26.3869	10.4
A0A2H5RDB1	Vesicle transport through interaction with t-SNAREs 1	RIR_0433100	225	27.3409	23.1
A0A2H5RDB5	COP9 signalosome complex subunit 5	RIR_0402000	352	28.6242	70.5
A0A2H5RDB9	HSP20 family protein (HSP20-like chaperone)	GLOIN_2v1757229 RIR_0432800	150	29.3682	73.3
A0A2H5RDC2	Trafficking protein particle complex subunit	RIR_0433900	206	23.9925	32
A0A2H5RDC6	Protein-serine/threonine phosphatase (EC 3.1.3.16)	GLOIN_2v1683555 RIR_0433300	491	27.3062	35.6
A0A2H5RDC9	M protein repeat protein	RIR_0433700	605	23.9357	7.6
A0A2H5RDD4	Poly(RC)-binding protein 2/3/4	RIR_0433800	398	26.5122	27.1
A0A2H5RDD7	Glyoxylate/hydroxypyruvate reductase	RIR_0433600	741	26.0162	11.1
A0A2H5RDE8	Ars binding protein abp2	RIR_0434300	679	23.0455	4.9
A0A2H5RDG3	Urease accessory protein	RIR_0437600	266	29.0609	73.3
A0A2H5RDJ4	Pentafunctional AROM polypeptide [Includes: 3-dehydroquinate synthase	RIR_0439600	1527	28.1194	24.6
A0A2H5RDJ5	Trafficking protein particle complex subunit 10	GLOIN_2v1686691 RIR_0439800	1185	26.3026	19.9
A0A2H5RDL1	Non-specific serine/threonine protein kinase (EC 2.7.11.1)	RIR_0440300	724	29.3228	45.3
A0A2H5RDL6	3-phosphoshikimate 1-carboxyvinyltransferase (EC 2.5.1.19)	GLOIN_2v1484694 RIR_0439500	883	28.4374	24.7
A0A2H5RDM3	E1 ubiquitin-activating enzyme (EC 6.2.1.45)	RIR_0441800	935	31.3326	73.6
A0A2H5RDP4	Nitrate reductase [NADPH] (EC 1.7.1.3)	GLOIN_2v1732571 RIR_0443500	534	27.2549	33.1
A0A2H5RDQ7	E3 ubiquitin-protein ligase trip12	RIR_0445100	2312	24.9857	8.3
A0A2H5RDU7	Exopolyphosphatase	GLOIN_2v1854733 RIR_0419300	403	23.7586	7.9
A0A2H5RDX8	Ribosomal 60S subunit protein L33	RIR_0421600	108	29.7165	51.9
A0A2H5REB2	U1 small nuclear ribonucleoprotein 70kDa	RIR_0433200	379	26.1517	24.3
A0A2H5REK5	Triose/dihydroxyacetone kinase / FAD-AMP lyase	RIR_0440700	559	27.5323	33.1
A0A2H5RF87	Uncharacterized protein	GLOIN_2v325696 RIR_0481300	199	23.0005	13.1
A0A2H5RFE9	Molybdopterin synthase catalytic subunit (EC 2.8.1.12)	GLOIN_2v1448938 RIR_0486700	148	27.043	73
A0A2H5RFG8	Endoplasmic reticulum protein (Sulfate transporter family-domain-containing protein)	GLOIN_2v1764509 RIR_0487200	653	24.5482	10.4
A0A2H5RFH3	Actin regulatory protein gmf1	GLOIN_2v1518001 RIR_0486900	138	25.4133	31.9
A0A2H5RFH6	Guanyl-nucleotide exchange factor sec2	RIR_0489400	539	24.8427	19.5
A0A2H5RFJ7	Peptidyl-prolyl isomerase D	RIR_0490300	364	29.3661	50.5
A0A2H5RFJ9	Isovaleryl-CoA dehydrogenase 2, mitochondrial	RIR_0491200	430	26.5586	34.2
A0A2H5RFK1	RNA polymerase-associated protein CTR9	RIR_0489300	972	24.8764	13.3
A0A2H5RFM5	Pre-mRNA-splicing factor CWC22	RIR_0492100	567	25.7202	16.9
A0A2H5RFM8	Ptc1 protein phosphatase type 2c	RIR_0493700	394	23.9287	9.4
A0A2H5RFP2	Proteasome subunit alpha type	RIR_0492300	241	29.6089	58.1
A0A2H5RFP4	Xaa-Pro aminopeptidase	RIR_0492200	533	30.7295	60.8
A0A2H5RFP8	26S proteasome regulatory subunit RPN2	RIR_0494400	947	30.7091	48.3
A0A2H5RFQ1	Glutathione peroxidase	RIR_0493300	208	29.7441	38
A0A2H5RFQ5	F-type H+-transporting ATPase subunit g	RIR_0493200	134	28.3306	29.1
A0A2H5RFR6	Cell death-inducing p53-target protein 1-like	GLOIN_2v1473918 RIR_0496700	175	26.5849	25.7
A0A2H5RFT4	Type I protein arginine methyltransferase	RIR_0495500	408	24.5646	7.6
A0A2H5RFT5	CCT-theta	RIR_0495600	555	32.0814	79.6
A0A2H5RFV5	Chromatin elongation factor SPT5 (Chromatin elongation factor spt5) (transcription Elongation factor SPT5)	GLOIN_2v1767920 RIR_0497400	1112	23.4194	6.7
A0A2H5RFW8	Charged multivesicular body protein 4	RIR_0500400	220	24.1963	15.5
A0A2H5RFX9	Uncharacterized protein	RIR_0500700	162	23.3342	32.1
A0A2H5RFZ0	Ribonucleoside-diphosphate reductase (EC 1.17.4.1)	RIR_0502100	776	25.2373	13
A0A2H5RFZ9	Peptide alpha-n-acetyltransferase nat2	RIR_0502400	280	24.3659	8.9
A0A2H5RG07	Methionine adenosyltransferase 2 subunit beta (Methionine adenosyltransferase II beta)	GLOIN_2v1548396 RIR_0501000	298	29.3128	81.5
A0A2H5RG34	Sepiapterin reductase family protein irc24	GLOIN_2v1737670 RIR_0504900	265	27.5149	46
A0A2H5RG61	Signal recognition particle receptor subunit alpha	RIR_0479000	940	23.0356	2.8
A0A2H5RGA9	Actin-related protein 8	RIR_0513100	722	23.7285	5.7
A0A2H5RGF1	Cop9 signalosome complex subunit 7	RIR_0513200	290	28.481	41.7
A0A2H5RGI5	Cytoplasm protein (Putative polysaccharide biosynthesis protein)	GLOIN_2v1517697 RIR_0489500	145	27.2617	51.7
A0A2H5RGJ8	Translation initiation factor 4B	RIR_0517200	378	27.7307	28.8
A0A2H5RGM3	Nitrilase-like protein	RIR_0521400	291	26.9613	45.7
A0A2H5RGP6	Non-specific serine/threonine protein kinase (EC 2.7.11.1)	GLOIN_2v1872908 RIR_0521600	744	27.4651	37.4
A0A2H5RGR7	11beta-hydroxysteroid dehydrogenase-like, putative	GLOIN_2v1704633 RIR_0525000	320	32.201	61.6
A0A2H5RGS9	Tyrosyl-DNA phosphodiesterase 1	RIR_0524900	806	26.9606	19.4
A0A2H5RGT9	Putative Smplekin	GLOIN_2v1704662 RIR_0524600	1141	24.5794	9.9
A0A2H5RGV9	Translin (Translin-associated factor trax)	GLOIN_2v1758474 RIR_0528400	252	27.1263	48
A0A2H5RGZ8	Glyoxal oxidase	RIR_0532100	644	28.406	18.9
A0A2H5RH40	1-phosphatidylinositol-3-phosphate 5-kinase	RIR_0533700	820	25.2347	10.5
A0A2H5RHD0	Btb/poz domain-containing protein 19-like	RIR_0541900	473	23.0903	5.1	Class C
A0A2H5RHD5	Kelch-like protein 17	RIR_0544300	467	23.3689	5.1	Class C
A0A2H5RHJ1	Btb/poz domain-containing protein 9	RIR_0547700	495	23.467	13.1	Class C
A0A2H5RHR8	Serine/threonine protein kinase	RIR_0554000	481	23.1527	9.1	Class C
A0A2H5RI79	Phosphatase activator	RIR_0566700	323	24.2166	11.5
A0A2H5RIE7	1-acylglycerol-3-phosphate O-acyltransferase	RIR_0571100	134	23.3165	8.2
A0A2H5RIN9	Cytochrome p450 2c5-like	RIR_0581400	543	24.7645	10.3
A0A2H5RIY6	Insulysin	RIR_0589600	983	24.9716	11.1
A0A2H5RJ83	p-loop containing nucleoside triphosphate hydrolase	RIR_0595900	1187	26.9605	25.7
A0A2H5RJ95	Phospholipid-transporting ATPase (EC 7.6.2.1)	RIR_0598300	1534	23.1159	2.9
A0A2H5RJA5	Fam49 family protein	GLOIN_2v1733148 RIR_0597800	316	23.0132	6.6
A0A2H5RJD4	Crinkler effector protein 1	CRN1 RIR_0600100	469	26.1735	26.4	Putative effector
A0A2H5RJH2	Domain membrane protein	GLOIN_2v1525681 RIR_0604600	435	24.4351	15.9
A0A2H5RJL2	Cytochrome P450 (Cytochrome p-450, putative)	GLOIN_2v1779144 RIR_0581200	540	23.5886	3.5
A0A2H5RJQ0	Uncharacterized protein	RIR_0609800	509	23.2333	6.3
A0A2H5RJR2	Uncharacterized protein	RIR_0609600	321	27.8857	20.9
A0A2H5RJR5	Uncharacterized protein	RIR_0609700	503	23.8214	7.6
A0A2H5RJS1	Uncharacterized protein	GLOIN_2v1526423 RIR_0612000	156	23.218	44.2
A0A2H5RJU1	Proteasome component ECM29	RIR_0613400	640	24.5822	20.3
A0A2H5RJV2	Actin cytoskeleton-regulatory complex protein PAN1 (Actin cytoskeleton-regulatory complex protein pan1)	RIR_0614600	2180	24.0933	5.2
A0A2H5RJW1	Proteasome component ECM29	RIR_0613300	1209	26.0178	14.1
A0A2H5RJZ7	rRNA biogenesis protein RRP5	RIR_0616100	1564	23.5598	4.8
A0A2H5RK09	Duf1941 family protein	RIR_0616200	1364	24.096	5.8
A0A2H5RK29	Mitochondrial import receptor subunit tom40	RIR_0617800	305	27.5663	43.9
A0A2H5RKI0	70 kDa heat shock protein 3 (Heat shock 70kDa protein 1/8)	GLOIN_2v1854354 RIR_0632900	608	23.5766	3.5
A0A2H5RKM4	Arginase (EC 3.5.3.1)	RIR_0610000	301	28.7632	36.2
A0A2H5RKM9	Uncharacterized protein	RIR_0637600	227	25.9928	35.2
A0A2H5RKN0	Enoyl-CoA hydratase	GLOIN_2v1769952 RIR_0634100	292	31.3505	62.3
A0A2H5RKQ0	Camp-dependent protein kinase pathway protein	RIR_0639000	744	23.7642	9.7
A0A2H5RKR6	Chitin synthase (EC 2.4.1.16)	RIR_0640600	1946	26.1933	12.5
A0A2H5RKS6	Nucleus protein	RIR_0641500	189	24.9757	49.7
A0A2H5RKU0	Signal sequence binding protein	RIR_0641300	2069	27.7391	17.1
A0A2H5RKU5	Midasin	GLOIN_2v1823502 GLOIN_2v1867657 RIR_0642100	298	23.5612	40.3
A0A2H5RKW0	Probable cytochrome p450 4d14 isoform x3	RIR_0643300	547	27.5128	52.8
A0A2H5RKX1	Actin-binding protein ipp-like	RIR_0644000	676	26.0724	21.6
A0A2H5RKX9	Glutathione S-transferase	RIR_0645700	196	30.1142	53.1
A0A2H5RKY3	Oxysterol-binding protein osh7p	RIR_0618100	422	26.5139	27.7
A0A2H5RKY8	Glutathione S-transferase (Ure2p)	GLOIN_2v1447324 RIR_0645200	216	26.7043	27.3
A0A2H5RKZ0	Glutathione S-transferase (Ure2p)	GLOIN_2v1499649 RIR_0646700	225	29.0548	32.4
A0A2H5RKZ9	Membrane protein	RIR_0643900	302	24.8512	9.3
A0A2H5RL11	Ure2p	RIR_0648000	218	25.8692	24.3
A0A2H5RL14	Glutathione S-transferase (Ure2p)	GLOIN_2v1499669 RIR_0646400	215	30.9686	45.1
A0A2H5RL15	WD40-repeat-containing domain protein (Wd repeat-containing protein)	GLOIN_2v1762364 RIR_0649100	603	22.9725	7.1
A0A2H5RL20	Ure2p	RIR_0648100	227	32.6073	52.9
A0A2H5RL29	Glutathione S-transferase (Ure2p)	GLOIN_2v1499658 RIR_0646500	217	26.1698	35
A0A2H5RL34	Superkiller protein 3	RIR_0649400	1404	27.2206	16.7
A0A2H5RL79	HD phosphohydrolase domain-containing protein	GLOIN_2v1498960 RIR_0652500	450	24.9737	20.9
A0A2H5RLE4	Ubiquitin carboxyl-terminal hydrolase (EC 3.4.19.12)	RIR_0654100	385	25.2865	23.1
A0A2H5RLH9	Serine/threonine protein kinase	RIR_0660800	470	25.0314	12.3	Class C
A0A2H5RLV0	Uncharacterized protein	RIR_0671000	537	23.813	11.5
A0A2H5RLV4	ER membrane protein complex subunit 1	RIR_0670200	1010	27.9973	21
A0A2H5RLV9	RHO1 GDP-GTP exchange protein 1/2	RIR_0672200	1259	22.9669	2.4
A0A2H5RLX4	Glutathione S-transferase (Ure2p)	GLOIN_2v1499640 RIR_0646800	224	29.6216	59.8
A0A2H5RLX8	RNA recognition motif domain containing protein	RIR_0672800	176	25.2714	22.2
A0A2H5RLY2	Putative glutathione S-transferase (Ure2p)	GLOIN_2v1744225 RIR_0647800	215	30.7946	71.2
A0A2H5RLZ6	V-type H+-transporting ATPase subunit D	RIR_0672700	379	27.9	34.8
A0A2H5RM26	AD domain-containing protein	GLOIN_2v1710303 RIR_0676500	264	23.9859	14.8
A0A2H5RM32	Mitochondrial ppr repeat protein ppr5	RIR_0676600	1166	25.4617	10.5
A0A2H5RM41	Chitobiosyldiphosphodolichol beta-mannosyltransferase (EC 2.4.1.142)	RIR_0677400	549	23.7427	3.8
A0A2H5RM43	Ran-binding protein 1	GLOIN_2v1554941 RIR_0674300	221	29.805	53.8
A0A2H5RM71	Uncharacterized protein	RIR_0681100	206	25.5759	35.9
A0A2H5RM72	V-ATPase assembly factor pkr1	RIR_0677000	528	23.417	13.8
A0A2H5RM81	Ubiquitin-ribosomal 40S subunit protein S31 fusion protein	RIR_0677800	164	26.6265	26.2
A0A2H5RMD1	M2 dsrna satellite propagation-like protein	RIR_0682100	726	27.8993	38.8
A0A2H5RMA4	Glyoxalase I (EC 4.4.1.5)	RIR_0682000	164	28.8391	66.5
A0A2H5RMG3	Uncharacterized protein	GLOIN_2v1708636 RIR_0687600	180	26.9233	30
A0A2H5RMH2	Geranylgeranyl transferase type-2 subunit alpha (EC 2.5.1.60) (Geranylgeranyl transferase type II subunit alpha)	RIR_0689600	375	26.0686	22.9
A0A2H5RMJ6	Thiosulfate/3-mercaptopyruvate sulfurtransferase	RIR_0691500	343	29.4835	52.5
A0A2H5RMR5	Clock controled protein	RIR_0670800	503	28.0415	30.6
A0A2H5RMT3	Kelch repeat protein	RIR_0697600	1259	26.9407	13.3	Class C
A0A2H5RMU0	Rho guanine nucleotide exchange factor	RIR_0672300	1309	26.5636	13.6
A0A2H5RN56	40S ribosomal protein S21	GLOIN_2v1676510 RIR_0681500	87	29.8994	86.2
A0A2H5RN80	Lrp16 family protein	RIR_0708400	727	28.831	39.2
A0A2H5RN93	K+ channel tetramerisation subfamily protein	RIR_0708300	256	23.8466	15.6
A0A2H5RNE4	Phospholipid:diacylglycerol acyltransferase	RIR_0712500	690	24.2029	10.7
A0A2H5RNF0	Sulfate permease, SulP family	RIR_0712800	1065	23.2944	5.9
A0A2H5RNJ9	Mitochondrial escape protein 2	RIR_0717100	786	26.1832	18.7
A0A2H5RNL6	Actin beta/gamma 1	RIR_0718300	387	25.8002	24.5
A0A2H5RNK7	Dolichyl-diphosphooligosaccharide--protein glycosyltransferase subunit WBP1 (Oligosaccharyl transferase subunit WBP1)	RIR_0717200	429	28.2274	34.5
A0A2H5RNM0	eIF-2B GDP-GTP exchange factor subunit epsilon	RIR_0718200	618	25.8261	14.2
A0A2H5RNL9	Ubiquitin-activating enzyme E1-like	RIR_0718600	587	26.6727	32.2
A0A2H5RNM8	U4/U6.U5 tri-snRNP-associated protein 2	RIR_0719800	386	24.7181	19.7
A0A2H5RNN6	SWI/SNF-related matrix-associated actin-dependent regulator of chromatin subfamily D	RIR_0719900	509	25.2346	15.5
A0A2H5RNQ6	Hormone-sensitive lipase	RIR_0718500	676	23.24	5.6
A0A2H5RP64	Negative regulator of beta-lactamase expression protein	RIR_0735500	233	27.9461	46.8
A0A2H5RP98	Uncharacterized protein	GLOIN_2v1609901 RIR_0739400	170	27.2611	41.2
A0A2H5RPE2	Extracellular dihydrogeodin oxidase/laccase	RIR_0743000	638	27.988	30.7
A0A2H5RPE6	Actin-binding protein ipp-like	GLOIN_2v1667259 RIR_0743500	672	27.1371	29.9
A0A2H5RPL0	H/ACA ribonucleoprotein complex subunit CBF5	GLOIN_2v1558475 RIR_0719700	542	28.2403	33
A0A2H5RPM0	KH_dom_type_1 domain-containing protein	RIR_0720300	450	26.9315	34.7
U9UEJ4	ATP-dependent RNA helicase DDX3X	GLOINDRAFT_344392 RIR_0749800	716	29.9761	43.6
A0A2H5RPR3	VWFA domain-containing protein	RIR_0752500	2486	27.4808	15.6
A0A2H5RPR6	VWFA domain-containing protein	RIR_0752600	2500	26.5322	10.8
A0A2H5RPT6	Biosynthesis polyketide synthase	RIR_0753900	1637	23.2588	3.4
A0A2H5RPU5	Elongation of fatty acids protein (EC 2.3.1.199) (Very-long-chain 3-oxoacyl-CoA synthase)	RIR_0754700	471	23.8526	11.7
A0A2H5RPV9	p-loop containing nucleoside triphosphate hydrolase protein	RIR_0754600	845	28.6989	46.2
A0A2H5RPW4	Uncharacterized protein	RIR_0757000	259	27.0958	52.5
A0A2H5RPW7	Phosphotransferase (EC 2.7.1.-)	RIR_0755400	366	30.5979	53.6
A0A2H5RPW8	Nicotinamide/nicotinate riboside kinase	RIR_0754000	284	24.9645	25
A0A2H5RPY8	E2 ubiquitin-conjugating enzyme	RIR_0757300	161	26.2466	21.7
A0A2H5RPY2	Thioredoxin-related transmembrane protein 2 homolog	RIR_0754900	293	23.5453	11.6
A0A2H5RPY4	FUS-interacting serine-arginine-rich protein 1	RIR_0758200	166	25.3199	24.7
A0A2H5RPZ3	Transportin-3	RIR_0757100	938	27.9702	31.1
A0A2H5RQ04	Transcriptional regulatory protein	RIR_0760500	423	24.77	24.3
A0A2H5RQ07	GTP cyclohydrolase 1 (EC 3.5.4.16) (GTP cyclohydrolase I)	GLOIN_2v1624302 RIR_0760300	223	24.2566	21.5
A0A2H5RQ08	Epoxide hydrolase	GLOIN_2v1479843 RIR_0760400	254	25.8012	31.5
A0A2H5RQ35	U2 small nuclear RNA auxillary factor	RIR_0761600	200	25.6961	25
A0A2H5RQ33	Importin-13	RIR_0762500	962	23.3613	7.5
A0A2H5RQ34	Hypothetical psp1-like protein	RIR_0762900	625	27.1848	23.4
A0A2H5RQ41	Uncharacterized protein	RIR_0760200	637	23.1242	2.5
A0A2H5RQ54	Iron ion homeostasis-related protein	RIR_0763200	234	24.4961	37.2
A0A2H5RQ55	Transcription initiation factor TFIID subunit TAF6	RIR_0764200	449	23.1867	5.1
A0A2H5RR51	Histone deacetylation-related protein	RIR_0765000	1268	22.2929	5	Histone and histone modification
A0A2H5RQ73	Polyadenylate-binding protein (PABP)	RIR_0764500	638	29.8953	51.7
A0A2H5RQ77	MICOS complex subunit MIC60 (Mitofilin)	RIR_0764300	512	29.606	44.3
A0A2H5RQ87	Molecular chaperone DnaK	RIR_0765100	776	32.0319	51.3
A0A2H5RQ97	Uncharacterized protein	RIR_0767600	387	24.2851	15.5
A0A2H5RQB1	Non-specific serine/threonine protein kinase (EC 2.7.11.1)	RIR_0741700	569	24.7564	12.8
A0A2H5RQC7	Crinkler family protein	RIR_0770700	446	23.2331	5.2	Putative effector
A0A2H5RQG1	Oxidoreductase like protein	RIR_0745400	427	28.935	57.8
A0A2H5RQZ2	Flap endonuclease 1 (FEN-1) (EC 3.1.-.-) (Flap structure-specific endonuclease 1)	FEN1 RIR_0760410	386	24.922	18.4
A0A2H5RRF6	E3 ubiquitin-protein ligase rnf213-like	RIR_0801800	5516	26.8117	4.3
A0A2H5RRG7	GTPase-activating protein, putative	RIR_0802800	400	23.3394	22.2
A0A2H5RRH1	Uncharacterized protein	RIR_0803400	75	24.8515	66.7
A0A2H5RRP1	Kinase-like domain-containing protein (Serine/threonine protein kinase)	GLOIN_2v1839555 RIR_0780500	447	23.6639	15	Class C
A0A2H5RRS9	Extracellular dihydrogeodin oxidase/laccase	RIR_0783700	608	28.6335	24
A0A2H5RS50	Cytochrome b pre-mRNA-processing protein 3 (Ubiquinol-cytochrome C chaperone-domain-containing protein)	GLOIN_2v1528251 RIR_0822200	278	23.1121	10.8
A0A2H5RS52	U3 small nucleolar RNA-associated protein 5	RIR_0822800	767	24.0079	8.3
A0A2H5RS75	Citrate synthase	GLOIN_2v1528221 RIR_0822400	484	30.9697	75
A0A2H5RS85	Geranylgeranyl transferase type-2 subunit beta (EC 2.5.1.60)	RIR_0824800	321	25.1932	21.8
A0A2H5RS94	26S proteasome regulatory subunit T3	RIR_0825500	444	29.1069	40.5
A0A2H5RS95	Kinesin-like protein	RIR_0825400	866	28.388	47.6
A0A2H5RSB5	ER heat shock protein Lhs1 (Predicted)	GLOIN_2v1694470 RIR_0827300	892	28.7996	37.2
A0A2H5RSB7	Diadenosine tetraphosphate synthetase (EC 6.1.1.14)	RIR_0828300	506	30.7191	68.6
A0A2H5RSC2	Alcohol dehydrogenase, zinc-containing	RIR_0828000	217	28.5286	66.4
A0A2H5RSD4	40S ribosomal protein S26	GLOIN_2v1694466 RIR_0827400	120	29.2551	40
A0A2H5RSD5	Eukaryotic translation initiation factor 3 subunit C (eIF3c)	NIP1 RIR_0829100	962	29.4093	45.4
A0A2H5RSD9	Alcohol dehydrogenase, zinccontaining, putative	RIR_0827900	147	29.2348	74.1
A0A2H5RSE4	Glycine-tRNA ligase	RIR_0828200	73	24.5218	12.3
A0A2H5RSF4	Protein disulfide-isomerase A6	RIR_0829200	182	28.8165	48.4
A0A2H5RSI7	Armadillo-type protein (Importin subunit beta-1)	GLOIN_2v1776822 RIR_0833300	867	29.6935	45.6
A0A2H5RSJ6	Trehalose 6-phosphate synthase/phosphatase	RIR_0833900	856	29.6764	55.6
A0A2H5RSM7	Chromatin remodeling complex ATPase subunit	RIR_0835600	1066	25.8967	15.8
A0A2H5RSP3	Acetohydroxy-acid synthase small subunit	GLOIN_2v1532038 RIR_0838900	350	27.1143	42.6
A0A2H5RSQ4	RNA-binding protein 26	RIR_0839100	657	25.1165	12.8
U9SVS8	Ras protein (Ras-related protein Rab-5C)	GLOIN_2v1532091 GLOINDRAFT_70024 RIR_0839400	214	29.0368	63.1
A0A2H5RSS0	Conserved fungal protein	RIR_0839600	285	23.9684	11.6
A0A2H5RST5	Eukaryotic translation initiation factor 5A (eIF-5A)	RIR_0841200	159	30.7582	83.6
A0A2H5RSW9	Heat shock protein hsp20/hsp26	RIR_0844800	190	32.5828	87.4
A0A2H5RSX2	CCT-beta	RIR_0844900	525	31.7374	69.9
A0A2H5RSX9	Protein-tyrosine-phosphatase	RIR_0845000	508	29.1965	43.5
A0A2H5RSY1	Heat shock protein 70 family (Heat shock protein hsp60)	GLOIN_2v370318 RIR_0845800	558	26.3182	15.9
A0A2H5RSY2	U6 snRNA-associated Sm-like protein LSm4	LSM4 RIR_0845500	147	25.84	14.3
A0A2H5RSY3	Arginyl-tRNA synthetase (EC 6.1.1.19)	RIR_0845200	612	29.3283	58.5
A0A2H5RSY6	Elongation factor 2	RIR_0845300	772	33.19	61
A0A2H5RSY9	Trafficking protein particle complex subunit	RIR_0846000	185	26.1987	30.3
A0A2H5RSZ2	AP-3 complex subunit beta	RIR_0846700	794	25.8306	13.4
A0A2H5RSZ5	3-deoxy-7-phosphoheptulonate synthase (EC 2.5.1.54)	RIR_0845400	640	28.6993	31.4
A0A2H5RSZ9	Ribosomal 40S subunit protein S16 (Ribosomal protein S5 domain 2-type protein)	GLOIN_2v1659445 RIR_0845100	142	31.3819	78.9
A0A2H5RT02	Probable electron transfer flavoprotein subunit alpha	RIR_0847500	321	29.2438	52.3
A0A2H5RT19	40S ribosomal protein S27	GLOIN_2v1659710 RIR_0847000	84	29.2563	35.7
A0A2H5RT20	Endoplasmic reticulum junction formation protein lunapark	RIR_0848600	313	25.4037	29.4
A0A2H5RT24	DNA-directed RNA polymerase I, II, and III subunit RPABC5 (DNA-directed RNA polymerases I, II, and III subunit RPABC5)	GLOIN_2v1659696 RIR_0846800	99	24.6597	42.4
A0A2H5RT36	Nuclear pore complex protein Nup205	GLOIN_2v1659806 RIR_0847600	2041	27.7997	24.5
A0A2H5RT40	Ww domain binding protein-2	RIR_0848700	227	25.7423	30
A0A2H5RT51	Serine/threonine protein phosphatase 5 phosphatase, putative	RIR_0851400	471	27.3654	26.5
A0A2H5RT67	Choline dehydrogenase	RIR_0852000	1196	26.7764	16.3
A0A2H5RT71	Ankyrin repeat protein	RIR_0853200	179	26.4437	35.2
A0A2H5RT81	NADH-ubiquinone oxidoreductase subunit	GLOIN_2v1783171 RIR_0852400	162	26.213	36.4
A0A2H5RT82	Altered inheritance of mitochondria protein 24, mitochondrial	RIR_0854100	445	28.0138	61.3
A0A2H5RT83	Poly(A)-specific ribonuclease (EC 3.1.13.4)	RIR_0853900	388	24.4652	12.6
A0A2H5RT88	Rab GDP dissociation inhibitor	RIR_0853800	403	32.0893	79.9
A0A2H5RT93	Ngg1 interacting factor 3 family protein	RIR_0854000	228	24.7538	29.4
A0A2H5RT97	NADH dehydrogenase (Ubiquinone) 1 beta subcomplex subunit 8	RIR_0853700	140	27.3133	40.7
A0A2H5RTA1	Copper homeostasis protein cutC homolog	RIR_0826800	241	24.0901	17
A0A2H5RTB5	Tyrosine aminotransferase	RIR_0857400	297	25.7491	35.7
A0A2H5RTC6	Small nuclear ribonucleoprotein-associated protein	RIR_0857000	284	27.6457	34.9
A0A2H5RTD2	Pre-mRNA splicing factor	RIR_0858100	1213	25.5671	11
A0A2H5RTD3	Copii-coated vesicle component	RIR_0857800	187	26.5122	27.8
A0A2H5RTG5	Fas1 domain-containing protein	RIR_0860200	131	23.5291	29.8
A0A2H5RTG9	Putative Plasma membrane phosphate transporter Pho87	RIR_0860000	879	28.8413	18.7
A0A2H5RTH0	Low quality protein: ubiquitin carboxyl-terminal hydrolase 25-like, partial	GLOIN_2v1625024 RIR_0833600	994	24.9001	9.9
A0A2H5RTY1	Peptidase s41 family protein	RIR_0873600	667	25.0611	7.8
A0A2H5RTY8	Peptidase s41 family protein	RIR_0873500	665	23.7509	4.1
A0A2H5RU81	Uncharacterized protein	RIR_0855200	349	26.8264	28.7
A0A2H5RUA3	3'-5' exonuclease for RNA 3' ss-tail	RIR_0857100	593	23.4546	11.3
A0A2H5RUE0	Ubiquitin domain-containing protein	RIR_0886200	335	25.8177	31.9
A0A2H5RUE2	DnaJ homolog subfamily C member 19	GLOIN_2v1675493 RIR_0859500	111	24.8279	55
A0A2H5RUF3	Uncharacterized protein	RIR_0887900	208	24.7719	29.3
A0A2H5RUS4	Uncharacterized protein	GLOIN_2v1530804 RIR_0896600	420	25.3104	22.9
A0A2H5RUV5	Alpha-amylase (EC 3.2.1.1)	GLOIN_2v1530689 RIR_0898400	512	29.5177	36.9
A0A2H5RVT3	Chitin deacetylase	RIR_0899000	392	29.3053	28.6
A0A2H5RVZ7	Protein phosphatase regulatory subunit ekc1	RIR_0928500	871	24.4695	5.5
A0A2H5RW19	Short-chain dehydrogenase/reductase sdr	RIR_0930700	213	32.4271	80.3
A0A2H5RW67	Uncharacterized protein	RIR_0935800	820	25.5338	13.4
A0A2H5RX84	Endoglycosylceramidase	RIR_0964800	342	29.9284	53.5
A0A2H5RXA1	Aryl-alcohol dehydrogenase aad14	RIR_0967400	377	26.3304	34.2
A0A2H5TS90	Flagellar calcium-binding protein-like	RIR_2803100	226	23.6656	13.7
A0A2H5RXD1	Aryl-alcohol dehydrogenase aad14	RIR_0969900	379	34.2927	62.8
A0A2H5RXD7	Aldo/keto reductase (Aryl-alcohol dehydrogenase aad14)	GLOIN_2v1858003 RIR_0968800	374	30.6469	51.1
A0A2H5RXH1	L-galactono-gamma-lactone oxidase (EC 1.1.3.37)	RIR_0973000	584	25.1402	18.3
A0A2H5RXK0	Glutathione S-transferase (Ure2p)	GLOIN_2v1611822 RIR_0975800	215	28.7864	36.3
A0A2H5RXL8	Aldo/keto reductase (Aryl-alcohol dehydrogenase aad14)	GLOIN_2v1611726 RIR_0977100	370	29.6741	60.8
A0A2H5RXN3	Putative seipin	GLOIN_2v1611639 RIR_0978300	452	27.2411	31.4
A0A2H5RXP4	Kinase-like domain-containing protein (Serine/threonine protein kinase)	GLOIN_2v1611572 RIR_0979100	504	25.4832	17.7
A0A2H5RXZ3	von willebrand domain-containing protein	RIR_0988000	856	27.8793	32.1
A0A2H5RY24	Phenylpyruvate tautomerase (Tautomerase/MIF superfamily)	GLOIN_2v1836290 RIR_0988700	116	31.4208	53.4
A0A2H5RY29	Acyl-coa dehydrogenase (Putative acyl-CoA dehydrogenase)	GLOIN_2v1526883 RIR_0990400	520	30.724	32.7
A0A2H5RY38	Acyl-coa dehydrogenase	RIR_0990600	520	29.5216	27.7
A0A2H5RY42	Extended fer/cip4 domain protein cdc15	RIR_0991700	1284	24.3341	2.6
A0A2H5RY83	Ddhd family phospholipase	GLOIN_2v1768480 RIR_0994300	733	24.3699	13.6
A0A2H5RYA2	Uncharacterized protein	GLOIN_2v1552565 RIR_0995900	355	26.205	27.9
A0A2H5RYC3	HD domain-containing protein	GLOIN_2v1552615 RIR_0996500	463	26.1422	20.5
A0A2H5RYG6	Abc transporter	RIR_1001100	785	25.296	14.8
A0A2H5RYI9	Btb/poz domain-containing protein kctd6-like	RIR_0976300	269	25.0553	16.7	Class C
A0A2H5RYJ1	Non-specific protein-tyrosine kinase (EC 2.7.10.2)	RIR_1003300	500	24.7899	24.4
A0A2H5RYL2	Ras homolog gene family, member A (Rho type small GTPase)	GLOIN_2v1512331 RIR_1005100	189	28.3496	59.8
A0A2H5RYL7	Beta-galactosidase (EC 3.2.1.23)	GLOIN_2v1512308 RIR_1005300	1053	26.5178	18.2
A0A2H5RYN3	Acetyltransferase component of pyruvate dehydrogenase complex (EC 2.3.1.12)	RIR_1006800	498	30.1758	58.8
A0A2H5RYQ2	Mitochondrion protein	RIR_1009200	158	27.898	56.3
A0A2H5RYT5	DNA damage-inducible protein 1	RIR_1009300	414	26.8765	24.4
A0A2H5RYZ7	Peroxisome organization and biogenesis-related protein	RIR_1017100	233	28.2465	24
A0A2H5RZ15	Glutamine synthetase	RIR_1018700	486	26.5641	24.9
A0A2H5RZ21	Ubiquitin thioesterase OTU1 (EC 3.4.19.12)	RIR_1019100	331	26.3512	34.1
A0A2H5RZ63	Uncharacterized protein	RIR_0996700	298	24.0214	16.8
A0A2H5RZ84	Ste/ste20/fray protein kinase	RIR_1024500	767	24.9989	10.6
A0A2H5RZA0	Uncharacterized protein	RIR_1026200	330	28.7411	40.3
A0A2H5RZA8	Hydroxyisourate hydrolase (EC 3.5.2.17)	RIR_1023900	167	27.7883	37.1
A0A2H5RZI9	Translation initiation factor 4E	RIR_1006700	224	28.1288	47.3
A0A2H5RZK4	NADH-ubiquinone oxidoreductase subunit	RIR_1034200	82	25.3704	23.2
A0A2H5RZK5	Uncharacterized protein	RIR_1034600	219	26.3295	31.1
A0A2H5RZL5	5'-nucleotidase	RIR_1034900	303	28.1122	47.5
U9UUG7	Uncharacterized protein	GLOIN_2v1539518 GLOINDRAFT_342218 RIR_1034700	194	24.5442	11.9
A0A2H5RZM1	Voltage-dependent potassium channel, beta subunit (Voltage-gated potassium channel protein beta-2 subunit)	GLOIN_2v1539359 RIR_1034000	335	29.8431	67.2
A0A2H5RZP3	2-oxoisovalerate dehydrogenase subunit alpha (EC 1.2.4.4) (Branched-chain alpha-keto acid dehydrogenase E1 component alpha chain)	RIR_1037900	389	24.4316	10.5
A0A2H5RZQ4	Nuclear-enriched ubiquitin-like polyubiquitin-binding protein Dsk2p	GLOIN_2v1539895 RIR_1038700	358	26.8175	11.2
A0A2H5RZR0	Methylmalonyl-CoA decarboxylase, alpha subunit	RIR_1038000	517	30.1575	46.2
A0A2H5RZR4	L dehydrogenase	RIR_1039700	221	25.8932	51.6
A0A2H5RZS2	Trehalose synthase	RIR_1040800	643	27.6763	38.9
A0A2H5RZS6	5'-3' exoribonuclease 1 (EC 3.1.13.-)	RIR_1039300	1362	25.6264	12.8
A0A2H5RZT4	Metaxin	RIR_1040900	253	26.6219	42.7
A0A2H5RZT9	Beach domain protein	RIR_1040200	3340	23.228	1
A0A2H5RZU8	Propanoyl-CoA:carbon dioxide ligase subunit alpha (Propionyl-CoA carboxylase alpha chain, mitochondrial)	RIR_1041500	666	30.7602	61.9
A0A2H5RZV4	Eukaryotic translation initiation factor 4E type 3 (Eukaryotic translation initiation factor 4e)	GLOIN_2v1540295 RIR_1042400	238	24.6503	24.8
A0A2H5RZZ7	Aspartyl aminopeptidase	RIR_1047100	460	30.7239	73
A0A2H5S001	Uncharacterized protein	RIR_1047000	1086	28.1051	21.4
A0A2H5S021	NAD-dependent epimerase/dehydratase	RIR_1046900	1044	27.8118	40.1
A0A2H5S067	Actin cortical patch component aip1	GLOIN_2v1653058 RIR_1052500	603	30.5627	61.9
A0A2H5S084	Uncharacterized protein	RIR_1053800	152	27.6408	66.4
A0A2H5S0G3	Pentatricopeptide repeat protein	RIR_1059600	575	27.9263	37.7
A0A2H5S0I2	Sec14 cytosolic factor family phosphatidylinositol transporter	RIR_1060100	396	24.6749	11.9
A0A2H5S0I5	Nucleolar protein	RIR_1061500	681	28.1159	39.1
A0A2H5S0I8	Nasp family CENP-a chaperone	RIR_1061400	468	24.4875	9.8
A0A2H5S0J9	TRAPP complex core subunit BET3	RIR_1060900	295	26.3466	19
A0A2H5S1C2	Meiotic RNA-binding protein 1 (spo5 in S. pombe)	RIR_1062000	598	27.2355	25.8	Sex and meiosis
A0A2H5S0L0	Cytosolic Cu/zn superoxide dismutase	RIR_1061800	237	27.6021	30.8
A0A2H5S0L3	ATP-binding cassette transporter ATM1	RIR_1063200	961	27.0382	15.3
A0A2H5S0L6	Ubiquitin C	RIR_1063600	381	26.4024	6.6
A0A2H5S0M1	Cytokinesis protein sepa	GLOIN_2v1612885 RIR_1063700	1456	23.2268	3
A0A2H5S0Q7	Glucosamine-6-phosphate isomerase (EC 3.5.99.6) (Glucosamine-6-phosphate deaminase)	RIR_1066800	299	26.1871	28.8
A0A2H5S0R0	Ddhd family phospholipase	RIR_1066100	796	25.6865	20.6
A0A2H5S0S9	GTPase-activating protein	RIR_1068400	1151	23.6202	3.4
A0A2H5S0S3	Amidase (EC 3.5.1.4)	RIR_1045300	602	26.7104	23.4
A0A2H5S0S6	Cytochrome P450 monooxygenase	RIR_1066200	456	24.0284	8.8
A0A2H5S0Z1	Non-specific serine/threonine protein kinase (EC 2.7.11.1)	RIR_1074100	737	24.4694	14.2	Class C
A0A2H5S0Z4	Leukotriene A-4 hydrolase (Peptidase family M1)	GLOIN_2v1711591 RIR_1074900	612	27.0644	22.4
A0A2H5S105	Mitochondrial thiamine pyrophosphate transporter (Predicted)	RIR_1075600	376	24.5036	14.1
A0A2H5S130	Vacuolar transporter chaperone 4	RIR_1076100	572	25.0946	18.9
A0A2H5S171	Methionine aminopeptidase 2 (MAP 2) (MetAP 2) (EC 3.4.11.18) (Peptidase M)	RIR_1080600	478	27.2449	39.7
A0A2H5S181	Uncharacterized protein	GLOIN_2v1476390 RIR_1082200	185	27.1881	41.1
A0A2H5S184	Uncharacterized protein	RIR_1082100	373	23.5191	12.3
A0A2H5S196	Eukaryotic translation initiation factor 3 subunit K (eIF3k) (eIF-3 p25)	GLOIN_2v1771650 RIR_1082700	235	27.2449	44.7
A0A2H5S1A1	Omega-amidase	RIR_1083500	310	28.7093	64.5
A0A2H5S1A8	Glyoxalase II (EC 3.1.2.6)	RIR_1081500	257	30.6783	77.4
A0A2H5S1D4	Alpha/beta superfamily hydrolase	RIR_1086400	149	26.4398	24.2
A0A2H5S1E8	DNA replication complex GINS protein PSF2	RIR_1087300	352	27.583	17.3
A0A2H5S1G3	Protein serine/threonine phosphatase 4 regulatory subunit 1	RIR_1088300	856	26.5471	24.2
A0A2H5S1G6	JEMT01029574.1_cds_EXX51812.1_28217	RIR_1088510	91	26.0498	31.9
A0A2H5S1G8	6-phosphogluconate dehydrogenase, decarboxylating (EC 1.1.1.44)	GLOIN_2v1496175 RIR_1088700	491	34.5132	88
A0A2H5S1H5	Orotate phosphoribosyltransferase (EC 2.4.2.10)	RIR_1089400	226	27.9311	65
A0A2H5S1I5	Mediator of RNA polymerase II transcription subunit 16 (Mediator complex subunit 16)	MED16 RIR_1089900	831	23.1895	6.1
A0A2H5S1L4	Enoyl reductase	RIR_1092700	690	31.4751	23.8
A0A2H5S1M3	Isoflavone reductase family protein cipa	GLOIN_2v1867335 RIR_1093300	286	25.392	18.5
A0A2H5S1T0	Uncharacterized protein	GLOIN_2v1578104 RIR_1075400	174	29.5853	77.6
A0A2H5S1V8	Extracellular serine-rich protein	RIR_1099800	143	26.2974	37.8
A0A2H5S1W3	Extracellular serine-rich protein	RIR_1099900	189	27.8463	34.4
A0A2H5S1Y2	Phospholipid-transporting ATPase (EC 7.6.2.1)	RIR_1101400	1009	26.3724	17.4
A0A2H5S1Y4	Actin-related protein 2/3 complex subunit 5	GLOIN_2v1157842 RIR_1101100	153	26.2915	47.7
A0A2H5S1Y9	Arginine biosynthesis bifunctional protein ArgJ, mitochondrial	RIR_1102500	232	28.4062	42.2
A0A2H5S217	Cytochrome p450 monooxygenase	RIR_1104200	564	24.2522	11.9
A0A2H5S224	Aldehyde dehydrogenase family protein	RIR_1104500	481	29.8058	64.9
A0A2H5S237	Serum paraoxonase/arylesterase family protein	RIR_1103700	331	26.8572	38.1
A0A2H5S262	Heat shock 70kDa protein 1/8	RIR_1108600	603	26.5006	2.7
A0A2H5S280	Uncharacterized protein	RIR_1109900	1413	26.6559	2.9
A0A2H5S286	Cytochrome p450 monooxygenase	RIR_1110000	487	29.0038	52
A0A2H5S2C0	Duf1682 family protein	RIR_1111900	389	24.6314	5.7
A0A2H5S2C4	Four-helix bundle copper-binding protein	GLOIN_2v1769074 RIR_1113100	103	27.3186	30.1
A0A2H5S2F9	Methionine--tRNA ligase (EC 6.1.1.10)	RIR_1115600	527	23.9347	23
A0A2H5S2G2	Integral membrane protein	RIR_1113300	448	23.3981	5.8
A0A2H5S2G8	Titin-like	RIR_1115300	243	27.5912	9.9
A0A2H5S2I6	IMP-specific 5'-nucleotidase 1 (EC 3.1.3.-)	RIR_1118500	437	23.2312	8.7
A0A2H5S2J3	Putative Transcription initiation factor TFIID subunit 5	RIR_1117700	696	24.8158	10.5
A0A2H5S2J6	Mitochondrial carrier domain-containing protein (Mitochondrial guanine nucleotide transporter)	GLOIN_2v1556127 RIR_1117800	319	27.9085	45.8
A0A2H5S2J9	Uncharacterized protein	RIR_1119000	124	31.9845	80.6
A0A2H5S2K7	Transcription elongation factor complex subunit Iws1 (Predicted)	RIR_1119700	321	24.6861	19.9
A0A2H5S2L3	Cytochrome p450 monooxygenase	RIR_1119500	483	23.2328	6.2
A0A2H5S2N0	HLH DNA binding protein	RIR_1121900	236	28.4229	57.6
A0A2H5S2N2	Phosphatase 1 regulatory subunit SDS22	RIR_1100500	351	26.4717	31.1
A0A2H5S2N7	V-type proton ATPase subunit	RIR_1121400	334	29.4742	56.3
A0A2H5S2P6	Erythritol-mannosyl-transferase invovled in mel production	RIR_1122200	642	26.0588	16
A0A2H5S2P7	Glyoxal oxidase	RIR_1121800	526	30.4001	54
A0A2H5S2Q2	Smooth muscle cell associated protein-1 isoform 2	RIR_1122400	639	25.6594	20.8
A0A2H5S2X9	Abc transporter protein	RIR_1128900	642	24.6436	10.1
A0A2H5S2Y2	Ubiquitinyl hydrolase 1 (EC 3.4.19.12)	GLOIN_2v1694931 RIR_1128000	1115	30.0129	54.5
A0A2H5S302	GTPase imap family member 8-like	RIR_1131200	446	24.2968	11.7
A0A2H5S309	GTPase imap family member 8-like	RIR_1131500	647	27.6391	9.9
A0A2H5S312	Efflux pump antibiotic resistance protein	GLOIN_2v1860978 RIR_1132200	564	24.7397	12.4
A0A2H5S314	GTPase imap family member 8-like	RIR_1131600	433	28.1996	25.4
A0A2H5S341	Uncharacterized protein	RIR_1135200	91	32.3348	53.8
A0A2H5S3J5	Uncharacterized protein	RIR_1125100	316	23.4479	27.2
A0A2H5S3S3	GTPase imap family member 8-like	RIR_1131700	647	28.2319	15.1
A0A2H5S435	26S proteasome regulatory complex component	GLOIN_2v1452378 RIR_1161600	446	30.7515	76.5
A0A2H5S442	Eukaryotic translation initiation factor 6 (eIF-6)	TIF6 RIR_1162300	234	27.3012	37.2
A0A2H5S448	Ethanolamine-phosphate cytidylytransferase	RIR_1162900	225	27.4563	59.1
A0A2H5S451	Coiled-coil domain-containing protein 115-like	GLOIN_2v1560745 RIR_1162700	224	23.4323	15.6
A0A2H5S453	Carbon catabolite repressor protein 4	RIR_1162600	725	23.7428	14.2
A0A2H5S456	ATP synthase subunit 5, mitochondrial	RIR_1162400	171	30.9968	53.2
A0A2H5S459	Nuclear distribution protein PAC1 (Lissencephaly-1 homolog) (LIS-1) (nudF homolog)	PAC1 LIS1 GLOIN_2v1560642 RIR_1163700	420	28.711	63.3
A0A2H5S467	Chaperone activator aha1	RIR_1164700	336	27.4153	38.1
A0A2H5S4H3	CDP-diacylglycerol synthase (EC 2.7.7.41) (Phosphatidate cytidylyltransferase, mitochondrial)	RIR_1172100	396	25.6596	24
A0A2H5S4I1	DnaJ homolog subfamily C member 7	RIR_1173300	506	27.7486	43.3
A0A2H5S4J4	Dynamin 1-like protein	RIR_1175100	719	27.1021	36.4
A0A2H5S4K3	Protein phosphatase PP2A regulatory subunit B	RIR_1174500	439	28.8387	32.3
A0A2H5S4K8	Translation initiation factor 2 subunit 1	RIR_1174300	300	28.7349	63
A0A2H5S4P2	Sorting nexin MVP1	RIR_1177600	565	28.2147	38.1
A0A2H5S4P8	Pre-mRNA branch site protein p14	RIR_1178700	140	24.1263	30
A0A2H5S4Q1	Argonaute binding protein 2	RIR_1178200	824	24.2746	14.8	RNAi-related
A0A2H5S4Q3	Pyridine nucleotide-disulfide oxidoreductase domain-containing protein 1	RIR_1178600	1048	27.4121	19.4
A0A2H5S4R0	Cyclohydrolase	RIR_1178800	490	29.0995	57.6
A0A2H5S4R2	6-phosphogluconolactonase (6PGL) (EC 3.1.1.31)	RIR_1179500	269	29.731	57.6
A0A2H5S4R3	Protein farnesyltransferase/ geranylgeranyltransferase type-1 subunit alpha	RIR_1179200	270	28.7184	47
A0A2H5S4R4	26S proteasome regulatory subunit T2	RIR_1179100	417	29.6191	40.8
A0A2H5S4T8	Hmg-box	RIR_1180900	156	24.1809	28.2
A0A2H5S4U8	Uncharacterized protein	GLOIN_2v1560735 RIR_1163000	283	23.5766	11.3
A0A2H5S4Z3	Uncharacterized protein	RIR_1186300	79	25.5901	36.7
A0A2H5S570	Uncharacterized protein	GLOIN_2v1606651 RIR_1192800	131	32.6329	65.6
A0A2H5S5Y3	Natb n-acetyltransferase complex regulatory subunit naa25	RIR_1192600	923	27.9189	35.8
A0A2H5S5B6	Non-specific serine/threonine protein kinase (EC 2.7.11.1)	RIR_1195900	759	28.6779	35.6	Class C
A0A2H5S5C3	Non-specific serine/threonine protein kinase (EC 2.7.11.1)	RIR_1195700	744	26.6532	24.2	Class C
A0A2H5S5C5	E3 ubiquitin-protein ligase rnf213-like	RIR_1194900	5737	29.0271	18.7
A0A2H5S5C7	Non-specific serine/threonine protein kinase (EC 2.7.11.1)	RIR_1195600	765	27.6766	28.1	Class C
A0A2H5S5D1	Asparagine synthase (glutamine-hydrolyzing) (EC 6.3.5.4)	RIR_1177200	516	27.0325	33.5
A0A2H5S5D2	6-hydroxy-D-nicotine oxidase	RIR_1196900	495	28.2595	36
A0A2H5S5D8	Non-specific serine/threonine protein kinase (EC 2.7.11.1)	RIR_1195800	724	25.5994	16.2	Class C
A0A2H5S5F9	Serine/threonine protein kinase	RIR_1197600	708	22.9992	3.1	Class C
A0A2H5S5V9	Uncharacterized protein	RIR_1210800	948	23.8187	3
A0A2H5S610	Kinase-like domain-containing protein (Tkl family protein kinase)	GLOIN_2v1881909 RIR_1214400	436	24.2523	13.8
A0A2H5S681	Protein disulfide isomerase	RIR_1221400	578	27.7891	31.1
A0A2H5S6A9	Dipeptidyl-peptidase V	RIR_1221800	1071	27.9274	24.1
A0A2H5S6D1	Antiviral helicase SLH1 (Putative DEAD/DEAH box helicase)	GLOIN_2v1653336 RIR_1204900	2081	25.8829	13.1
A0A2H5S6I5	Actin cytoskeleton organization protein app1	RIR_1231500	636	29.145	51.1
A0A2H5S6N8	Glyoxal oxidase	RIR_1235400	564	31.1567	40.8
A0A2H5S6Q1	WW domain-containing oxidoreductase	GLOIN_2v1764674 RIR_1236400	316	26.2753	39.9
A0A2H5S6T9	Mitochondrion protein	RIR_1239500	461	23.1437	7.6
A0A2H5S6U3	Autophagy-related protein 16, animal type (WD40-repeat-containing domain protein)	GLOIN_2v1519844 RIR_1239400	581	22.9424	7.4
A0A2H5S6Y0	Meiosis induction protein kinase IME2/SME1	RIR_1242300	1113	30.219	15.1	Sex and meiosis
A0A2H5S6Y4	Orotidine 5'-phosphate decarboxylase (EC 4.1.1.23)	GLOIN_2v1520186 RIR_1242100	263	26.6983	47.9
A0A2H5S6Z8	Transformer-2 protein	RIR_1242600	259	24.9743	18.5
A0A2H5S724	Cdc50-like protein	RIR_1244400	448	26.8659	15.2
A0A2H5S709	ASXH domain-containing protein	RIR_1242700	491	25.3758	15.1
A0A2H5S712	General transcriptional repressor	RIR_1243800	866	26.9633	20.7
A0A2H5S714	Ribonucloprotein	RIR_1244500	206	26.7959	29.6
A0A2H5S716	Actin-related protein 2	RIR_1243500	397	27.9951	35
A0A2H5S745	Uma2 domain-containing protein	RIR_1248700	323	23.2796	9
A0A2H5S791	Ubiquitin-conjugating enzyme family protein	GLOIN_2v1459513 RIR_1253000	726	23.945	8
A0A2H5S797	Pep-cterm sorting domain-containing protein	GLOIN_2v1847507 RIR_1251800	329	28.9434	48
A0A2H5S7B4	Uncharacterized protein	GLOIN_2v1634845 RIR_1254700	712	23.2584	5.5
A0A2H5S7B9	Acyl-coenzyme A oxidase	RIR_1253500	684	27.2337	36.4
A0A2H5S7D5	Non-specific serine/threonine protein kinase (EC 2.7.11.1)	RIR_1254000	694	25.9837	16
A0A2H5S7E4	Protein phosphatase (EC 3.1.3.16)	RIR_1257100	388	23.6195	10.1
A0A2H5S7G3	Copper transporter	RIR_1257700	319	29.4235	16.9
A0A2H5S7G4	Outer membrane voltage-dependent anion-selective channel	RIR_1257400	323	30.4296	32.8
A0A2H5S7G5	Putative defense protein hdd11-like	GLOIN_2v1635085 RIR_1256100	217	26.0277	22.1
A0A2H5S7L2	Aldo/keto reductase	GLOIN_2v1519929 RIR_1240100	330	26.8611	4.2
A0A2H5S7M5	NADH dehydrogenase (Ubiquinone) Fe-S protein 7	RIR_1262300	222	25.9388	35.1
A0A2H5S7M9	Glycerol-3-phosphate dehydrogenase (EC 1.1.5.3)	RIR_1262500	764	29.431	48.8
A0A2H5S7N5	Clavaminate synthase-like protein	RIR_1263200	400	27.551	60.5
A0A2H5S7N6	Nuclear pore protein	RIR_1242000	901	27.9364	38.1
A0A2H5S7R0	Calcium-binding protein	GLOIN_2v1673741 RIR_1264400	185	26.5759	36.2
A0A2H5S7R2	Protein scai isoform x5	RIR_1244300	620	27.7916	39.4
A0A2H5S7R3	Succinate-semialdehyde dehydrogenase / glutarate-semialdehyde dehydrogenase	RIR_1266100	363	29.8489	63.6
A0A2H5S7S0	Saccharopine dehydrogenase	RIR_1267000	431	30.5436	66.4
A0A2H5S7S2	Gnat family acetyltransferase	RIR_1266400	368	24.9574	24.2
A0A2H5S7S5	Importin-5	RIR_1266600	795	26.0222	19
A0A2H5S7T7	60S ribosomal export protein NMD3	RIR_1266500	785	25.88	20
A0A2H5S7U0	AP-3 complex subunit delta	GLOIN_2v1673472 RIR_1267100	1252	23.8115	6.2
A0A2H5S7U2	Rho family GTPase rho1	RIR_1268300	220	25.8027	35.9
A0A2H5S7U3	PRA1 family protein	RIR_1268100	282	28.7369	28.4
A0A2H5S7U8	Succinate-semialdehyde dehydrogenase	RIR_1266000	80	27.5469	76.2
A0A2H5S7X1	Pantetheine-phosphate adenylyltransferase protein	GLOIN_2v1611288 RIR_1270400	327	23.6956	9.5
A0A2H5S7X9	Putative Pre-60S factor REI1	GLOIN_2v1794567 RIR_1270500	387	24.1735	13.7
A0A2H5S7Y6	Mitochondrial import inner membrane translocase subunit TIM16	GLOIN_2v1857849 RIR_1268500	138	25.2986	54.3
A0A2H5S7Y8	RNA cytidine acetyltransferase (EC 2.3.1.-) (18S rRNA cytosine acetyltransferase)	NAT10 RIR_1271400	734	23.5706	10.1
A0A2H5S7Z8	Nuclear pore protein ely5	RIR_1270900	833	23.4916	8.6
A0A2H5S800	Threonyl-tRNA synthetase (EC 6.1.1.3)	RIR_1272200	711	23.6598	6.5
A0A2H5S803	Mads-box-containing transcription factor	GLOIN_2v1610831 RIR_1273100	283	25.0622	23.7
A0A2H5S804	Uncharacterized protein	GLOIN_2v1611248 RIR_1270700	324	30.6345	62.7
A0A2H5S8Q6	Cargo-transport protein ypp1	RIR_1271000	926	24.1612	12.1
A0A2H5S811	6-phosphofructo-2-kinase	RIR_1274000	716	26.9825	35.2
A0A2H5S812	RNA binding protein	RIR_1273900	353	26.6461	21.8
A0A2H5S814	Uncharacterized protein	RIR_1274100	172	24.9136	44.2
A0A2H5S818	GDP-L-fucose synthase (EC 1.1.1.271)	GLOIN_2v1775258 RIR_1272700	325	29.9083	67.1
A0A2H5S8T4	Nuclear division rft1 protein	RIR_1273500	764	23.3819	4.6
A0A2H5S835	Ubiquitin-domain-containing protein	RIR_1272400	207	26.6648	52.7
A0A2H5S839	Mitochondrial translation protein	RIR_1273600	566	28.1394	16.4
A0A2H5S845	F-actin-capping protein subunit beta	RIR_1273200	264	27.9142	41.3
A0A2H5S866	Uncharacterized protein	GLOIN_2v1709121 RIR_1279100	354	25.9351	28.8
A0A2H5S8B1	Isocitrate dehydrogenase [NAD] subunit, mitochondrial	RIR_1281200	424	29.8689	43.4
A0A2H5S8C1	RalA-binding protein 1	RIR_1281100	1530	24.7555	4.4
A0A2H5S8C2	Tumor antigen cml66-l	RIR_1280900	166	24.7721	39.8
A0A2H5S8C4	Vacuolar protein sorting-associated protein	RIR_1283700	3186	31.7541	52
A0A2H5S8D5	Diphthamide synthase (EC 6.3.1.14) (Diphthamide synthetase) (Diphthine--ammonia ligase)	RIR_1284400	746	24.0586	8.7
A0A2H5S8E0	IK cytokine	GLOIN_2v1701054 RIR_1282400	565	22.9599	5
A0A2H5S8F7	Uncharacterized protein	GLOIN_2v1709323 RIR_1281500	193	28.5673	67.4
A0A2H5S8G4	Superoxide dismutase (EC 1.15.1.1)	GLOIN_2v1700945 RIR_1284000	228	32.4403	78.1
A0A2H5S8G5	Mediator complex subunit 5 (Mediator of RNA polymerase II transcription subunit 5)	RIR_1287000	792	24.0017	8
A0A2H5S8H2	Putative microtubule-associated protein, partial	RIR_1287900	425	25.2432	50.8
A0A2H5S8H5	Chitin deacetylase	RIR_1282900	373	28.5451	36.2
A0A2H5S8I8	RING-box protein 1	RIR_1283800	109	25.6338	12.8
A0A2H5S8J3	Vacuolar protein sorting-associated protein 33	RIR_1288600	310	24.5048	13.2
A0A2H5S8J4	Amidase (EC 3.5.1.4)	RIR_1289700	581	27.4525	30.3
A0A2H5S8K0	Sjogrens syndrome scleroderma autoantigen 1 family protein	RIR_1287600	294	25.2698	21.1
A0A2H5S8K1	Argonaute binding protein 1	RIR_1288700	565	25.2166	28.1	RNAi-related
A0A2H5S8K9	Vacuolar protein sorting-associated protein 33	RIR_1288500	336	25.07	27.7
A0A2H5S8N3	AIR synthase (EC 6.3.3.1) (EC 6.3.4.13) (Glycinamide ribonucleotide synthetase)	RIR_1288000	728	27.9928	36.8
A0A2H5S8P2	Secondary thiamine-phosphate synthase enzyme	RIR_1291900	138	25.6699	44.2
A0A2H5S8R6	26S proteasome non-ATPase regulatory subunit 3 (26S proteasome regulatory subunit N3)	GLOIN_2v1588279 RIR_1291400	491	30.4494	68
A0A2H5S8U0	Mediator of RNA polymerase II transcription subunit 17 (Mediator complex subunit 17)	MED17 RIR_1292900	636	23.9535	15.7
A0A2H5S950	Polyamine n-acetyltransferase	RIR_1283300	463	26.1498	13.4
A0A2H5S992	Gh11553	RIR_1306200	469	23.6889	8.7
A0A2H5S998	Kelch-like protein 17	GLOIN_2v1772476 RIR_1306900	516	23.8766	6.8	Class C
A0A2H5S9A3	Kelch-like protein 17	RIR_1310200	467	25.8699	16.7	Class C
A0A2H5S9D8	Ribosomal RNA-processing protein 43	GLOIN_2v1454928 RIR_1291000	292	26.3201	30.8
A0A2H5S9H6	Isoflavone reductase family protein cipa	RIR_1315900	288	30.9158	26
A0A2H5S9K1	Btb/poz domain-containing protein 19	RIR_1316600	510	26.2298	25.9	Class C
A0A2H5S9M0	Kelch-like protein 17	RIR_1319100	502	27.3661	34.3	Class C
A0A2H5S9P2	Kinase-like domain-containing protein (Sel1 repeat domain-containing protein)	GLOIN_2v1719160 RIR_1322900	504	23.555	11.7	Class C
A0A2H5S9P6	Isoflavone reductase family protein cipa	GLOIN_2v1663308 RIR_1316000	289	28.0397	27
A0A2H5S9X3	Sel1 repeat domain-containing protein	RIR_1323100	477	23.6425	14.5	Class C
A0A2H5SA73	Kelch-like protein 17	RIR_1313300	428	23.6993	10	Class C
A0A2H5SAA3	Kelch-like protein 17	RIR_1339900	467	27.1057	35.1	Class C
A0A2H5SAI5	Kelch repeat protein	RIR_1347800	523	23.5147	10.1	Class C
A0A2H5SAI9	Serine/threonine-protein kinase sty8-like	RIR_1347000	480	24.3516	14	Class C
A0A2H5SAL9	Peptide-n(4)-(N-acetyl-beta-glucosaminyl) asparagine amidase-like	GLOIN_2v1470770 RIR_1348500	455	26.3144	28.8
A0A2H5SAN7	Kelch repeat protein	GLOIN_2v1470756 RIR_1350600	460	24.0608	6.5	Class C
A0A2H5SAS3	Mitochondrial inner membrane i-AAA protease complex subunit Yme1 (Predicted)	RIR_1353100	773	23.2522	8.7
A0A2H5SAQ6	Uncharacterized protein	RIR_1351500	581	24.0791	4.3
A0A2H5SAR6	Acetyl-CoA C-acyltransferase	RIR_1350800	461	25.4827	25.6
A0A2H5SAX6	Protein kinase C (EC 2.7.11.13)	RIR_1357400	1025	28.2902	28.7	Class C
A0A2H5SAV6	Uncharacterized protein	GLOIN_2v1791210 RIR_1355300	476	30.8705	52.9
A0A2H5SAW6	Phosphatase 2C-like domain-containing protein (Protein phosphatase PTC2/3)	GLOIN_2v1561434 RIR_1358500	457	30.6864	61.9
A0A2H5SB85	MIR domain-containing protein	RIR_1366100	324	23.3061	6.2
A0A2H5SBD4	Uncharacterized protein	GLOIN_2v1709522 RIR_1365900	331	26.178	31.4
A0A2H5SBH4	Mitochondrial 54S ribosomal protein YmL17/YmL30	RIR_1373300	288	23.6851	6.9
A0A2H5SBH9	Lysosomal acid lipase/cholesteryl ester hydrolase	RIR_1373200	458	23.6936	17.7
A0A2H5SBI2	Complex III subunit 7	RIR_1372900	87	29.3119	62.1
A0A2H5SBI5	AP-1 adaptor complex subunit mu, putative (AP-1 complex subunit mu)	GLOIN_2v1742216 RIR_1374000	436	26.342	33.5
A0A2H5SBJ8	Mitochondrial 54S ribosomal protein YmL6	RIR_1374600	272	23.8993	11.8
A0A2H5SBK5	Glutaminyl-tRNA synthetase (EC 6.1.1.18)	GLOIN_2v1615349 RIR_1374700	795	29.0528	44.7
A0A2H5SBN2	Flagellar associated protein	RIR_1377300	463	27.0215	27.6
A0A2H5SBP6	Periplasmic divalent cation tolerance protein	RIR_1375400	165	27.3037	42.4
A0A2H5SBP7	FACT complex subunit POB3	RIR_1379800	545	26.8749	27
A0A2H5SBP8	Cytokine inducing-glycoprotein	RIR_1378900	149	28.5642	24.8
A0A2H5SBQ6	Recombination hotspot-binding protein	RIR_1380100	233	28.8428	55.4	Sex and meiosis
A0A2H5SBQ9	Bridging integrator 3	GLOIN_2v1775834 RIR_1380500	256	26.6897	37.9
A0A2H5SBR8	Tpr repeat protein, meiotically spliced	RIR_1380300	198	27.027	27.3
A0A2H5SBS3	Deoxyhypusine hydroxylase (DOHH) (EC 1.14.99.29) (Deoxyhypusine dioxygenase) (Deoxyhypusine monooxygenase)	LIA1 GLOIN_2v1615796 RIR_1380400	319	24.0053	23.2
A0A2H5SBT5	Arsenite-resistant protein asr2	RIR_1381000	562	25.8233	19.9
A0A2H5SBT6	Sterol metabolism-related protein	GLOIN_2v1615851 RIR_1381100	119	29.753	88.2
A0A2H5SBU6	Glucosamine 6-phosphate N-acetyltransferase (EC 2.3.1.4)	GLOIN_2v1479174 RIR_1377400	177	27.5653	70.1
A0A2H5SBW9	Serine/threonine protein phosphatase 5 phosphatase, putative	RIR_1384800	731	23.3871	6
A0A2H5SC70	Tellurium resistance protein terz-like, partial	GLOIN_2v1880554 RIR_1391600	354	23.126	6.2
A0A2H5SC71	Uncharacterized protein	GLOIN_2v1717897 RIR_1368100	166	26.3298	29.5
A0A2H5SCB9	Tellurium resistance protein terz-like, partial	GLOIN_2v1781663 RIR_1391300	358	23.0569	8.1
A0A2H5SCE8	Small nuclear ribonucleoprotein (LSM7), putative (U6 snRNA-associated Sm-like protein LSm7)	GLOIN_2v1858188 RIR_1374300	126	23.8824	26.2
A0A2H5SCF1	Ricin B-type lectin domain-containing protein	GLOIN_2v1883121 RIR_1398100	428	24.4122	11.7
A0A2H5SCL6	Poly(A)+ RNA export protein (mRNA export factor)	GLOIN_2v1615757 RIR_1379900	352	25.9246	22.7
A0A2H5SCM3	Adaptation to pheromone during conjugation with cellular fusion-related protein	RIR_1380600	404	24.9462	13.1
A0A2H5SCW7	Epidermal growth factor receptor substrate 15	RIR_1413800	1070	24.768	9.8
A0A2H5SCY0	Cytochrome p450 monooxygenase	RIR_1414600	635	23.2453	3
A0A2H5SD06	Nuclear pore complex protein Nup155	RIR_1415800	1202	27.6133	27.2
A0A2H5SD09	Uncharacterized protein	RIR_1417200	445	24.6089	9.4
A0A2H5SD29	Peptidase	RIR_1412900	865	23.9083	5.1
A0A2H5SD33	Uncharacterized protein	RIR_1417400	733	25.837	11.9
A0A2H5SD44	Bzip transcription factor	RIR_1415300	416	25.3597	20.7
A0A2H5SD48	Aminopeptidase (EC 3.4.11.-)	GLOIN_2v1541065 RIR_1413300	882	33.018	73.4
A0A2H5SD61	Ricin B-type lectin domain-containing protein	RIR_1421000	443	24.4527	5.9
A0A2H5SD71	Uncharacterized protein	RIR_1416300	1304	23.3975	2.5
A0A2H5SD79	E3 ubiquitin protein ligase (EC 2.3.2.27)	GLOIN_2v1542053 RIR_1422800	887	24.5273	16.2
A0A2H5SD81	Uncharacterized protein	RIR_1417100	256	23.8033	12.9
A0A2H5SD82	Protein transport protein SEC61 subunit alpha	RIR_1421400	418	28.2665	21.3
A0A2H5SD90	Actin-related protein 2/3 complex subunit 4	GLOIN_2v1542089 RIR_1423800	169	28.1587	62.1
A0A2H5SE24	Nucleosome assembly protein nap1	RIR_1423600	354	28.6839	41.2
A0A2H5SDE2	Hypothetical pas domain protein	RIR_1424800	404	24.4047	21.8
A0A2H5SDC7	Dimethylaniline monooxygenase [N-oxide-forming] 5	RIR_1421300	527	24.9575	26.2
A0A2H5SDD9	Mitochondrial ATPase complex subunit ATP10	RIR_1423700	218	24.027	16.1
A0A2H5SDG6	ATP-dependent RNA helicase DDX5/DBP2 (P-loop containing nucleoside triphosphate hydrolase protein)	GLOIN_2v1542164 RIR_1424500	601	25.7003	22.3
A0A2H5SDJ0	Expressed protein	RIR_1430800	867	23.7978	6.9
A0A2H5SDP7	Uma2 domain-containing protein	RIR_1435700	375	25.565	14.1
A0A2H5SDS0	Kelch repeat protein	RIR_1438800	452	25.1205	12.2	Class C
A0A2H5SDT2	RuvB-like helicase (EC 3.6.4.12)	GLOIN_2v1767105 RIR_1416100	456	29.1366	52.2
A0A2H5SE34	Uncharacterized protein	RIR_1424400	189	23.4849	25.4
A0A2H5SE53	3-hydroxyacyl-CoA dehydrogenase / 3-hydroxy-2-methylbutyryl-CoA dehydrogenase	GLOIN_2v1745917 RIR_1445500	259	26.6331	25.1
A0A2H5SEG9	Tyrosine kinase domain protein	RIR_1459100	762	24.1218	9.8	Class C
A0A2H5SEI6	Carbonic anhydrase (EC 4.2.1.1)	RIR_1461400	239	27.9044	45.2
A0A2H5SEJ0	Btb/poz domain containing protein	RIR_1454700	486	27.116	25.5	Class C
A0A2H5SEK7	Retinol dehydrogenase 12-like	GLOIN_2v1721473 RIR_1464000	300	26.4634	37
A0A2H5SEM4	Short-chain dehydrogenase tic 32, chloroplastic isoform x2	RIR_1464100	301	29.3028	41.9
A0A2H5SEM6	Retinol dehydrogenase 13-like	GLOIN_2v1786135 RIR_1465200	302	23.9446	12.3
A0A2H5SEN2	Retinol dehydrogenase 12-like	RIR_1465000	301	25.0979	33.9
A0A2H5SEQ9	ATP-dependent RNA helicase DDX60	RIR_1466300	1882	30.9195	51.2
A0A2H5SEY0	Short-chain dehydrogenase tic 32, chloroplastic isoform x2	GLOIN_2v1485949 RIR_1465500	299	26.3967	45.8
A0A2H5SF84	Uncharacterized protein	GLOIN_2v1779294 RIR_1483200	524	26.0673	40.3
A0A2H5SF91	Uncharacterized protein	RIR_1484600	191	26.525	39.8
A0A2H5SF96	Uncharacterized protein	RIR_1482800	710	23.5822	5.2
A0A2H5SFA0	Uncharacterized protein	RIR_1483700	512	27.5384	43.2
A0A2H5SFG1	Retinol dehydrogenase 12 (Retinol dehydrogenase 12-like protein)	GLOIN_2v1487745 RIR_1464500	303	24.5264	14.2
A0A2H5SFI8	Uncharacterized protein	RIR_1483500	641	27.0006	35.4
A0A2H5SFU2	Hsp70 family protein	GLOIN_2v1678595 RIR_1499500	544	26.6909	31.2
A0A2H5SFU7	Eukaryotic translation initiation factor 2-alpha kinase 2	RIR_1492600	355	27.96	50.4
A0A2H5SFV6	Hsp70 family protein	RIR_1500000	974	23.7669	4.1
A0A2H5SFX9	Nesprin-2-like, partial	RIR_1500300	625	23.4955	3.5
A0A2H5SG01	Hsp70 family protein	RIR_1502200	443	24.1723	17.4
A0A2H5SG11	Non-specific serine/threonine protein kinase (EC 2.7.11.1)	RIR_1482400	863	23.0383	6.8	Class C
A0A2H5SG24	Hsp70 family protein	RIR_1483300	533	24.4314	25
A0A2H5SG34	Microtubule-associated protein 1a	RIR_1499800	493	24.3668	9.7
A0A2H5SG37	Uncharacterized protein	GLOIN_2v1732727 RIR_1507800	389	24.8077	10.3
A0A2H5SG42	Hsp70 family protein	GLOIN_2v1732731 RIR_1507900	628	26.4548	22.6
A0A2H5SG50	Uncharacterized protein	GLOIN_2v1678344 RIR_1508800	427	28.3137	34.2
A0A2H5SG51	Uncharacterized protein	RIR_1505000	462	27.059	31.6
A0A2H5SG81	Hsp70 family protein	RIR_1510800	568	23.6829	14.8
A0A2H5SG88	Hsp70 family protein	RIR_1505100	579	28.1973	45.9
A0A2H5SGL9	Translation initiation factor 4G	RIR_1524400	651	23.4463	4.3
A0A2H5SGN1	Hsp70 family protein	GLOIN_2v1845506 RIR_1499600	578	25.948	16.6
A0A2H5SGP8	Hsp70 family protein	GLOIN_2v1484166 RIR_1501400	567	23.9344	9.3
A0A2H5SGS0	Fad binding domain protein	RIR_1528200	451	27.0145	36.1
A0A2H5SGS8	Non-specific serine/threonine protein kinase (EC 2.7.11.1)	RIR_1526800	812	24.8095	3.1	Class C
A0A2H5SGT9	Hsp70 family protein	RIR_1504900	545	23.2927	7.3
A0A2H5SGV0	Fad binding domain protein	RIR_1528400	446	24.4429	10.3
A0A2H5SGZ4	Crinkler family protein	RIR_1531000	637	27.2588	20.9	Putative effector
A0A2H5SH12	Sam-dependent methyltransferase	RIR_1527200	191	31.5871	67
A0A2H5SHB4	Uncharacterized protein	RIR_1542900	187	24.3013	29.9
A0A2H5SHU0	Phenoloxidase subunit 1-like	RIR_1555400	639	27.8725	29.7
A0A2H5SI76	Hypothetical integral membrane protein	GLOIN_2v1616248 RIR_1566700	1026	25.3744	7
A0A2H5SI81	Ubiquitin domain-containing protein	RIR_1565200	328	25.243	34.1
A0A2H5SI88	Nf-x1 finger and helicase domain protein	RIR_1566900	2221	26.7711	14.9
A0A2H5SI89	Expressed protein	RIR_1568000	313	25.427	8
A0A2H5SI91	GDP-mannose 4,6-dehydratase (EC 4.2.1.47)	RIR_1565800	364	31.7333	64
A0A2H5SI99	Proteasome subunit alpha type	GLOIN_2v1615982 RIR_1568700	253	30.7434	71.5
A0A2H5SIA1	Tyrosine--tRNA ligase (EC 6.1.1.1) (Tyrosyl-tRNA synthetase)	RIR_1567800	496	25.6316	26.2
A0A2H5SIA8	4-alpha-glucanotransferase / amylo-1,6-glucosidase-debranching	RIR_1567700	1583	30.3798	45.2
A0A2H5SIB0	Triosephosphate isomerase (EC 5.3.1.1)	RIR_1568900	223	31.2672	82.5
A0A2H5SIH2	E3 ubiquitin-protein ligase rnf213-like	GLOIN_2v1841731 RIR_1567000	4760	28.3155	15.4
A0A2H5SIH9	CoA-transferase family III (Coa transferase)	GLOIN_2v1616316 RIR_1566600	451	23.3829	5.5
A0A2H5SIN1	40S ribosomal protein S23	RIR_1579000	88	29.2112	22.7
A0A2H5SIN7	60S ribosomal protein L11	RIR_1579600	194	30.534	61.3
A0A2H5SIT1	Pro-apoptotic serine protease NMA111 (Pro-apoptotic serine protease nma111)	RIR_1558800	932	24.8996	12
A0A2H5SIU7	E3 ubiquitin-protein ligase rnf213-like	RIR_1584200	5425	26.5728	6.6
A0A2H5SIW8	Negative elongation factor C/D (TH1 family protein)	GLOIN_2v1555201 RIR_1578900	625	24.3874	16.8
A0A2H5SIZ4	5'-nucleotidase (EC 3.1.3.5)	RIR_1579500	296	23.8313	25.3
A0A2H5SIZ9	Chitinase (EC 3.2.1.14)	RIR_1584000	1110	26.8512	10.8
A0A2H5SJ18	Carnitine O-acetyltransferase	RIR_1566400	641	29.8322	59
A0A2H5SJ23	Ubiquitin-conjugating enzyme E2	RIR_1585800	286	22.9795	8.4
A0A2H5SJ62	Ndt80 / phog like DNA-binding family protein	RIR_1591800	674	26.1057	14.1
A0A2H5SJ79	40S ribosomal protein S8	RIR_1594000	287	30.5817	36.2
A0A2H5SJ84	Eukaryotic translation initiation factor 5B (Translation initiation factor IF-2)	RIR_1592200	1602	27.6447	13.9
A0A2H5SJ86	ADP-ribosylation factor GTPase-activating protein	GLOIN_2v1774813 RIR_1594200	459	25.5044	23.3
A0A2H5SJA3	Eukaryotic translation initiation factor 3 subunit A (eIF3a)	TIF32 GLOIN_2v1606043 RIR_1594100	1164	29.4624	34.7
A0A2H5SJA4	Ubiquitin-protein ligase E3 (Predicted) (Vacuolar protein sorting protein 18)	GLOIN_2v1605964 RIR_1594700	1010	26.2003	15.7
A0A2H5SJA7	E2 ubiquitin-conjugating enzyme	RIR_1596400	210	26.7038	20
A0A2H5SJC6	Mitochondrial chch domain protein	GLOIN_2v1605283 RIR_1597900	163	23.9291	30.7
A0A2H5SJF5	Nuclear pore complex protein	RIR_1598000	814	26.7347	23.6
A0A2H5SJG2	Chitin synthase (EC 2.4.1.16)	GLOIN_2v1864359 RIR_1600120	920	24.9568	8
A0A2H5SJG7	Cation dependent mannose-6-phosphate cargo receptor	GLOIN_2v1705762 RIR_1600500	295	23.7385	12.9
A0A2H5SJH4	Nicotinamide phosphoribosyltransferase	GLOIN_2v1705841 RIR_1599700	504	30.9026	57.9
A0A2H5SJH5	ATP-dependent chaperone ClpB	RIR_1596300	693	29.7822	56.7
A0A2H5SJH8	Translation initiation factor subunit beta	RIR_1597400	322	27.7055	31.7
A0A2H5SJN4	Isochorismatase domain-containing protein	RIR_1601200	211	29.3191	59.7
A0A2H5SJR3	Aldo/keto reductase	GLOIN_2v1016968 RIR_1609200	331	26.1293	27.5
A0A2H5SJR4	Aldo/keto reductase	RIR_1608900	345	29.0387	31.6
A0A2H5SJV3	T-complex protein 1 subunit gamma	RIR_1612000	618	31.8018	56.3
A0A2H5SK14	Adenylate kinase	RIR_1613300	255	28.1849	48.2
A0A2H5SK20	5'-deoxynucleotidase (EC 3.1.3.89)	RIR_1615200	214	23.1144	29.4
A0A2H5SK60	AIG1-type G domain-containing protein	GLOIN_2v1658506 RIR_1620300	272	23.5154	14
A0A2H5SK89	Asparaginase (EC 3.5.1.1)	RIR_1617200	739	23.6931	5.4
A0A2H5SKD4	Neutral zinc metallopeptidase	RIR_1626500	1578	25.538	14.2
A0A2H5SKH7	Alpha/Beta hydrolase protein (Putative lipase, class 3)	GLOIN_2v1480373 RIR_1629000	563	27.9986	35
A0A2H5SKL2	HSP20 family protein	RIR_1632200	146	24.4541	22.6
A0A2H5SKL3	Aldo/keto reductase	GLOIN_2v1571795 RIR_1609500	329	27.6297	33.4
A0A2H5SKU8	Uncharacterized protein	GLOIN_2v1530019 RIR_1638400	508	30.2253	62.8
A0A2H5SL29	Cytochrome p450 monooxygenase	RIR_1644400	493	23.7147	11.4
A0A2H5SL54	Uncharacterized protein	GLOIN_2v1700470 RIR_1643200	187	25.907	44.9
A0A2H5SLS8	Nitric oxide dioxygenase	GLOIN_2v1727598 RIR_1666800	289	23.5024	13.1
A0A2H5SLW6	E3 ubiquitin-protein ligase PEP5 (EC 2.3.2.27)	RIR_1669000	1011	26.3172	19.1
A0A2H5SLX7	Protein disulfide-isomerase (EC 5.3.4.1)	RIR_1668900	551	31.3345	44.6
A0A2H5SLX8	UDP-glucose:glycoprotein glucosyltransferase	RIR_1669300	1576	27.7832	20.4
A0A2H5SLY5	Mitochondrial import receptor subunit TOM20	GLOIN_2v1514977 RIR_1670600	482	27.9514	58.1
A0A2H5SLY9	Cap1 methyltransferase	RIR_1668300	623	23.6707	9.3
A0A2H5SM10	Tat pathway signal sequence domain protein	RIR_1672000	338	26.0923	12.7
A0A2H5SM44	Gyf domain protein	RIR_1675600	1400	24.7642	8.8
A0A2H5SM45	DNA helicase (EC 3.6.4.12)	GLOIN_2v1514563 RIR_1675400	838	25.0496	10.3
A0A2H5SM59	Mitogen-activated protein kinase kinase kinase	RIR_1675900	1453	24.4572	5.3	Class C
A0A2H5SM69	Endoplasmic reticulum protein	RIR_1674400	295	26.1312	24.1
A0A2H5SM83	Twinkle protein	RIR_1678100	666	23.6356	9.8
A0A2H5SM94	Prefoldin subunit 3	GLOIN_2v1514352 RIR_1678000	196	28.7491	58.7
A0A2H5SMD5	Vesicle-fusing ATPase (EC 3.6.4.6)	GLOIN_2v1514526 RIR_1675700	436	28.5934	57.8
A0A2H5SMG5	Pre-mRNA splicing factor	RIR_1677800	264	25.281	8.3
A0A2H5SMN1	Non-specific serine/threonine protein kinase (EC 2.7.11.1)	RIR_1688900	694	27.4546	42.5	Class C
A0A2H5SMN4	TAG lipase / lysophosphatidylethanolamine acyltransferase	RIR_1689600	532	24.5767	19.5
A0A2H5SMR2	Uncharacterized protein	RIR_1684600	228	27.759	36.4
A0A2H5SMR8	Vesicular-fusion protein SEC18 (EC 3.6.4.6)	RIR_1693100	809	29.8933	59.3
A0A2H5SMS2	Rho family GTPase rho1	RIR_1692900	165	29.3924	66.1
A0A2H5SMT2	Ubiquitin-like modifier HUB1	RIR_1693800	72	26.7915	47.2
A0A2H5SMT9	Non-specific serine/threonine protein kinase (EC 2.7.11.1)	RIR_1694200	679	28.6884	39.2	Class C
A0A2H5SMV6	Clip-associating protein 1	RIR_1674300	640	25.6464	16.7
A0A2H5SMW8	Vamp/synaptobrevin-associated protein family protein	RIR_1696500	283	25.8735	22.6
A0A2H5SMY5	Stress protein ddr48	RIR_1697200	224	25.9285	72.3
A0A2H5SMY7	Carboxy-terminal domain RNA polymerase II polypeptide A small phosphatase	RIR_1677500	407	25.7912	22.6
A0A2H5SMZ0	BTB domain-containing protein	GLOIN_2v1572508 RIR_1696800	579	27.2116	34.7	Class C
A0A2H5SN22	Uncharacterized protein	RIR_1700200	2127	23.9886	3.3
A0A2H5SN66	Alpha-galactosidase (EC 3.2.1.22) (Melibiase)	RIR_1704500	422	27.7793	37.9
A0A2H5SNB9	Ubiquitin conjugation factor E4	RIR_1690100	1049	27.2183	21.6
A0A2H5SPJ6	Uncharacterized protein	RIR_1727900	167	26.9912	23.4
A0A2H5SP63	Methylenetetrahydrofolate dehydrogenase(NAD+)	RIR_1729600	306	27.3419	47.7
A0A2H5SP70	3-hydroxy acid dehydrogenase / malonic semialdehyde reductase	RIR_1728500	274	26.3784	25.5
A0A2H5SPL8	Elongator complex protein 1	GLOIN_2v1784559 RIR_1729500	1314	23.605	4.3
A0A2H5SPP6	Putative aarF domain-containing kinase	RIR_1743700	327	23.2673	10.1
A0A2H5SPU7	Hypothetical scp-like extracellular protein domain-containing protein	RIR_1748700	153	23.4876	26.1
A0A2H5SQ03	ThiJ/PfpI family transcriptional regulator	RIR_1752500	192	24.5955	10.9
A0A2H5SQ91	Serine/threonine protein kinase	RIR_1759200	1038	26.0311	3.7	Class C
A0A2H5SQF6	Non-specific serine/threonine protein kinase (EC 2.7.11.1)	RIR_1766500	2154	23.8874	1.3	Class C
A0A2H5SQM5	Non-specific serine/threonine protein kinase (EC 2.7.11.1)	RIR_1771500	2244	25.9522	7.7	Class C
A0A2H5SQS2	Uncharacterized protein	RIR_1773400	488	24.7773	4.1
A0A2H5SQY6	Cytochrome P450 monooxygenase	RIR_1777900	524	23.2586	6.7
A0A2H5SQY9	Protein ATP-binding cassette transporter	RIR_1777600	856	24.5601	4.9
A0A2H5SQZ7	Uncharacterized protein	RIR_1777700	124	27.1046	58.9
A0A2H5SR27	Calmodulin-dependent protein kinase	RIR_1782200	590	25.0639	12.4
A0A2H5SR37	Aquaporin 1 (Aquaporin rerated protein, other eukaryote)	GLOIN_2v1682276 RIR_1779800	253	29.3905	12.6
A0A2H5SR64	von willebrand factor a domain-containing protein 8-like	RIR_1785700	1953	28.1744	26.1
A0A2H5SR70	Glutamate-5-semialdehyde dehydrogenase	GLOIN_2v1643900 RIR_1785500	448	27.7848	43.1
A0A2H5SRA1	NADH dehydrogenase	RIR_1784800	322	26.1998	32.3
A0A2H5SRA3	JEMT01029649.1_cds_EXX51511.1_28516	RIR_1786230	113	29.3177	38.1
A0A2H5SRC3	von willebrand domain-containing protein	RIR_1786900	997	28.0365	25
A0A2H5SRN2	Sphinganine-1-phosphate aldolase	RIR_1797800	492	26.6925	24
A0A2H5SRN7	Bar domain protein	GLOIN_2v1602425 RIR_1797900	284	27.4942	55.3
A0A2H5SRQ4	Cytochrome c oxidase subunit 5b	RIR_1798300	132	26.0237	22
A0A2H5SRP3	Stomatin-like protein	RIR_1798100	326	28.658	37.7
A0A2H5SRP4	Peroxidase (EC 1.11.1.-)	RIR_1797600	269	31.7152	65.4
A0A2H5SRP9	Glucose-6-phosphate isomerase (EC 5.3.1.9)	RIR_1799300	514	31.801	72.6
A0A2H5SRQ8	Metaxin	RIR_1798400	326	24.9792	19.3
A0A2H5SRR5	Protein JSN1	GLOIN_2v1602563 RIR_1799100	1300	24.6284	5
A0A2H5SRS1	Alanine--glyoxylate aminotransferase (EC 2.6.1.44) (EC 2.6.1.51)	GLOIN_2v1644250 RIR_1788000	383	30.4701	56.4
A0A2H5SRW0	Asparaginyl-tRNA synthetase	RIR_1803800	431	28.2775	31.6
A0A2H5SRX2	RNA-binding protein nrd1	RIR_1804000	554	26.368	38.4
A0A2H5SRW5	Peptidyl-prolyl cis-trans isomerase (PPIase) (EC 5.2.1.8)	RIR_1804200	149	25.9301	33.6
A0A2H5SRX8	Spindle pole body component	RIR_1805400	845	23.3834	8.6
A0A2H5SRY2	Protein FRA10AC1	RIR_1806000	263	23.0105	8
A0A2H5SRZ4	Glycerol-3-phosphate dehydrogenase [NAD(+)] (EC 1.1.1.8)	RIR_1806800	365	27.6942	33.2
A0A2H5SS04	Pre-mRNA-processing factor 39	RIR_1806500	719	27.2529	30.3
A0A2H5SS29	Eukaryotic translation initiation factor 2C	RIR_1809300	815	28.5871	39.3	RNAi-related
A0A2H5SS35	Threonine ammonia-lyase (EC 4.3.1.19)	RIR_1809600	517	28.6954	57.6
A0A2H5SS41	COP9 signalosome complex subunit 8	RIR_1810000	227	26.8213	31.3
A0A2H5SS44	Cysteine proteinase 1, mitochondrial (EC 3.4.22.40)	RIR_1810500	470	29.4503	48.9
A0A2H5SS45	Extracellular serine-rich protein	RIR_1810300	444	23.1582	6.1
A0A2H5SS46	Adenylosuccinate synthetase (AMPSase) (AdSS) (EC 6.3.4.4) (IMP--aspartate ligase)	RIR_1809500	383	27.9958	53.5
A0A2H5SS49	Kelch repeat protein	RIR_1811000	501	24.9412	14.8	Class C
A0A2H5SS52	Tigr02452 family protein	RIR_1811400	337	28.3833	49.9
A0A2H5SS81	Fumarylacetoacetase (EC 3.7.1.2) (Fumarylacetoacetate hydrolase)	RIR_1813700	417	28.0738	63.5
A0A2H5SSA1	Ubiquitinyl hydrolase 1 (EC 3.4.19.12)	RIR_1813600	3209	27.9619	17.5
A0A2H5SSA7	Asparagine-tRNA ligase	RIR_1803900	67	25.5511	58.2
A0A2H5SSD1	Ring finger domain protein	RIR_1817600	295	25.0138	13.6
A0A2H5SSE1	MICOS complex subunit	RIR_1818400	1978	28.6608	18.9
A0A2H5SSE2	Translocation protein SEC62	RIR_1818500	159	26.1006	18.2
A0A2H5SSH6	Quinone oxidoreductase	RIR_1821300	1128	28.1897	13.8
A0A2H5SSJ3	U3 small nucleolar RNA-associated protein 3	RIR_1820700	1294	24.6437	5.8
A0A2H5SSL9	L-lactate dehydrogenase (EC 1.1.1.27)	RIR_1824200	281	30.8086	71.5
A0A2H5SSM7	PDCD5-related protein (Programmed cell death protein 5)	GLOIN_2v1525159 RIR_1824500	130	23.362	28.5
A0A2H5SSM8	Cytochrome C1 family-domain-containing protein	GLOIN_2v1525069 RIR_1825600	310	29.1721	51.9
A0A2H5SSP3	Non-specific serine/threonine protein kinase (EC 2.7.11.1)	RIR_1827400	547	24.2617	5.1	Class C
A0A2H5SSQ3	Pentatricopeptide repeat protein	RIR_1825800	376	26.0053	18.6
A0A2H5SSQ4	Alpha,alpha-trehalose-phosphate synthase (UDP-forming) (EC 2.4.1.15)	GLOIN_2v1582750 RIR_1828100	777	31.0268	62.9
A0A2H5SSQ9	Diacylglycerol cholinephosphotransferase	RIR_1828200	346	26.0218	6.1
A0A2H5SSR9	Casein kinase II subunit alpha	RIR_1828900	328	27.5452	35.4
A0A2H5SSS2	Cytochrome P450 (Cytochrome p450 monooxygenase)	GLOIN_2v1582625 RIR_1829700	502	29.5523	42.2
A0A2H5SST4	DUF727 domain-containing protein	GLOIN_2v1582707 RIR_1829000	131	25.708	41.2
A0A2H5SST9	Cytochrome P450 (Cytochrome p450 monooxygenase)	GLOIN_2v1582502 RIR_1830900	503	25.4344	15.1
A0A2H5SSU4	Cytochrome P450 (Cytochrome p450 monooxygenase)	GLOIN_2v1454446 RIR_1830200	487	26.2468	33.9
A0A2H5SSV5	Hemocyanin II	RIR_1832400	655	30.4255	62.7
A0A2H5SSV6	Hemocyanin II	RIR_1832300	670	31.7416	60.6
A0A2H5SSW2	Carboxypeptidase D (Putative serine carboxypeptidase)	GLOIN_2v1839714 RIR_1832100	604	23.1613	9.9
A0A2H5ST02	Hemocyanin II	RIR_1832200	679	33.2613	71.1
A0A2H5ST08	Uncharacterized protein	RIR_1837000	1168	23.7402	4.5
A0A2H5ST73	Ubiquitin domain-containing protein	RIR_1842100	319	23.288	17.6
A0A2H5STH2	Hexaprenyldihydroxybenzoate methyltransferase	RIR_1850100	223	26.5995	37.2
A0A2H5STN0	Glutamate-rich protein 3	RIR_1855000	974	24.4311	2
A0A2H5STQ0	Sacsin-like, partial	RIR_1844000	1108	24.712	15.9
A0A2H5STS2	Cytochrome p450 monooxygenase	RIR_1858600	524	28.647	46.2
A0A2H5STT2	Protein-tyrosine phosphatase	RIR_1859600	168	25.3121	31
A0A2H5STV2	Branched-chain-amino-acid aminotransferase-like protein 1	RIR_1848000	295	25.0157	29.5
A0A2H5SU83	Glucuronosyltransferase	RIR_1868400	515	23.5376	16.1
A0A2H5SUC3	Uncharacterized protein	RIR_1871400	635	23.7094	13.7
A0A2H5SUV0	Class I glutamine amidotransferase	RIR_1890200	275	25.2231	18.2
A0A2H5SUV2	Cytochrome p450 monooxygenase	RIR_1887400	514	27.8545	43.2
A0A2H5SUX5	Uncharacterized protein	RIR_1890800	241	24.325	20.3
A0A2H5SUZ4	Secretory carrier-associated membrane protein	GLOIN_2v1581020 RIR_1892300	193	23.5371	10.9
A0A2H5SV52	Extracellular dihydrogeodin oxidase/laccase	RIR_1898300	612	23.9825	2.3
A0A2H5SV64	Cys-Gly metallodipeptidase DUG1	RIR_1898900	479	28.1698	25.1
A0A2H5SV85	Extracellular dihydrogeodin oxidase/laccase	RIR_1898400	620	29.1317	24.5
A0A2H5SV94	p-loop containing nucleoside triphosphate hydrolase protein	RIR_1899300	2192	23.3241	2.3
A0A2H5SVB8	6-hydroxy-D-nicotine oxidase	RIR_1903400	453	26.1673	23.2
A0A2H5SVC7	Uncharacterized protein	GLOIN_2v1780843 RIR_1901800	298	25.0109	25.8
A0A2H5SVF1	Aldo-keto reductase (Aldose reductase, putative)	GLOIN_2v278480 RIR_1906700	293	27.1774	42
A0A2H5SVF2	Putative Alpha/beta superfamily hydrolase	GLOIN_2v1646060 RIR_1906600	286	24.9972	22.7
A0A2H5SVG7	Protein krueppel	RIR_1907300	424	22.6355	6.4
A0A2H5SVJ6	Crooked neck	RIR_1909900	680	25.9321	19.9
A0A2H5SVK1	Methylenetetrahydrofolate reductase (EC 1.5.1.20)	RIR_1910300	570	25.6302	19.5
A0A2H5SVL0	Protein mmf1	RIR_1911200	155	28.3083	56.8
A0A2H5SVL1	60S ribosomal protein L36	GLOIN_2v1720160 RIR_1910900	109	29.4854	31.2
A0A2H5SVL9	Eukaryotic translation initiation factor 3 subunit G (eIF3g)	TIF35 GLOIN_2v1788829 RIR_1910600	288	27.7694	34
A0A2H5SVV1	Biotin synthase	RIR_1906800	307	26.6778	30.6
A0A2H5SW02	Phosphopyruvate hydratase (EC 4.2.1.11)	RIR_1924700	396	32.5451	65.4
A0A2H5SW09	2,5-diamino-6-(5-phospho-D-ribosylamino)pyrimidin-4(3H)-one reductase	RIR_1925600	186	23.7264	34.4
A0A2H5SW12	Diacylglycerol O-acyltransferase (EC 2.3.1.20)	RIR_1925800	337	26.4616	34.4
A0A2H5SW18	THO complex subunit 4	RIR_1925300	252	25.9463	14.3
A0A2H5SW32	Hhe domain cation binding protein	RIR_1925400	233	29.9198	65.7
A0A2H5SW38	Calcium-binding protein	RIR_1928100	239	29.6538	49
A0A2H5SW48	Adenine nucleotide transporter	RIR_1928700	311	25.4854	12.9
A0A2H5SW70	Translocation protein SEC63	RIR_1927800	636	28.1544	39.6
A0A2H5SW76	Mitochondrial-processing peptidase subunit beta	RIR_1931500	448	30.2188	47.8
A0A2H5SW77	Regulator of nonsense transcripts 3	RIR_1931200	559	23.1001	4.5
A0A2H5SWB9	Myosin V	RIR_1931700	1609	29.9047	51.5
A0A2H5SWC3	Signal recognition particle subunit SRP68 (SRP68)	GLOIN_2v1538534 RIR_1933200	610	27.4011	34.6
A0A2H5SWD0	Ubiquilin	RIR_1935300	477	23.9577	9.9
A0A2H5SWE0	NAD(P)-binding protein	RIR_1936400	296	28.1401	54.7
A0A2H5SWF5	Uncharacterized protein	RIR_1935800	208	25.5617	29.3
A0A2H5SWF6	Isocitrate lyase	RIR_1924000	492	32.7327	71.5
A0A2H5SWG1	Thioredoxin-like protein	RIR_1935900	163	28.8382	58.9
A0A2H5SWJ6	Phosphoketolase (Xylulose-5-phosphate/fructose-6-phosphate phosphoketolase)	GLOIN_2v1537931 RIR_1927500	799	30.2028	48.7
A0A2H5SWN0	Uncharacterized protein	GLOIN_2v1524126 RIR_1943300	203	24.1692	28.1
A0A2H5SWN1	Mitochondrial import inner membrane translocase subunit TIM50	RIR_1943100	417	26.4155	25.2
A0A2H5SWP0	Adenosylhomocysteinase	RIR_1944200	187	30.6122	56.1
A0A2H5SWP1	Protein-serine/threonine kinase (EC 2.7.11.-)	RIR_1943900	331	24.6693	15.4	Class C
A0A2H5SWP2	Adenosylhomocysteinase	RIR_1944100	174	30.2385	42
A0A2H5SWQ2	Maleylacetoacetate isomerase	RIR_1944800	215	29.8523	80.5
A0A2H5SWQ4	ATP synthase subunit beta (EC 7.1.2.2)	RIR_1943700	520	33.5679	72.3
A0A2H5SWT2	Carboxylic ester hydrolase (EC 3.1.1.-)	RIR_1947700	394	25.7672	21.6
A0A2H5SWU7	Sac3/ganp domain protein associated with nuclear localization of protein	RIR_1947500	515	23.1262	8.2
A0A2H5SWX0	ABC multidrug transporter Mdr1 (ATP-binding cassette, subfamily B (MDR/TAP), member 1)	GLOIN_2v1702847 RIR_1950700	1290	23.8602	4.7
A0A2H5SX08	Putative ribonuclease t2 family protein	RIR_1952500	598	23.1507	5.9
A0A2H5SX35	Prenylcysteine oxidase/farnesylcysteine lyase	RIR_1954600	463	29.5157	52.5
A0A2H5SX36	Structural maintenance of chromosomes protein	RIR_1954400	1250	24.7673	7
A0A2H5SX43	40S ribosomal protein S5	RIR_1954500	188	31.3159	44.7
A0A2H5SX54	Exportin-T (Exportin(tRNA)) (tRNA exportin)	RIR_1954300	1022	27.2397	20.8
A0A2H5SX62	Uncharacterized protein	GLOIN_2v1524760 RIR_1957400	198	25.0609	28.3
A0A2H5SX64	60S ribosomal protein L8	RIR_1955100	264	30.5218	63.3
A0A2H5SX76	Duf1000-domain-containing protein	RIR_1956900	444	23.2739	5.2
A0A2H5SX78	ER lumen protein-retaining receptor	GLOIN_2v1524833 RIR_1958500	215	24.9916	17.7
A0A2H5SX82	Nuclear export mediator factor nemf	RIR_1958800	1093	25.1795	8.6
A0A2H5SXA9	Cytosol aminopeptidase	RIR_1959000	566	32.6207	68.6
A0A2H5SXB0	Uncharacterized protein	GLOIN_2v1766211 RIR_1961300	128	23.8881	27.3
A0A2H5SXB4	Non-specific serine/threonine protein kinase (EC 2.7.11.1)	RIR_1961600	483	24.4207	6.8	Class C
A0A2H5SXD5	Cytosol aminopeptidase	RIR_1963300	526	27.6325	45.1
A0A2H5SXF5	Proteasomal ATPase-associated factor 1	RIR_1964700	415	27.5271	47
A0A2H5SXH2	Heterogeneous nuclear rnp K-like protein 2	RIR_1966200	921	27.4358	17.6
A0A2H5SXH5	Ph-response transcription factor pacc/rim101	RIR_1966000	578	23.6488	8.8
A0A2H5SXI4	Glutamate dehydrogenase	GLOIN_2v1852386 RIR_1966700	516	29.6657	54.8
A0A2H5SXI5	Holo-[acyl-carrier-protein] synthase	RIR_1954100	863	30.0976	22.1
A0A2H5SXJ2	Cysteine synthase A	RIR_1967400	331	28.8268	52.6
A0A2H5SXJ6	Vacuolar protein sorting-associated protein IST1	RIR_1967600	302	23.2072	6
A0A2H5SXJ9	cAMP-dependent protein kinase regulatory subunit	RIR_1955600	372	26.3962	23.1
A0A2H5SXK1	Chitin synthase (EC 2.4.1.16)	GLOIN_2v1791132 RIR_1968200	1860	25.6603	10.1
A0A2H5SXK9	Charged multivesicular body protein 6	RIR_1967700	167	23.8224	11.4
A0A2H5SXM8	DNA topoisomerase I (EC 5.6.2.1) (DNA topoisomerase 1)	RIR_1958000	913	26.955	19.8
A0A2H5SXN4	Peptidyl-prolyl cis-trans isomerase (EC 5.2.1.8)	RIR_1971100	221	29.2858	67
A0A2H5SXP0	Cytochrome c oxidase subunit	GLOIN_2v1524838 RIR_1958600	86	28.4332	72.1
A0A2H5SXP2	L-galactono-gamma-lactone oxidase (EC 1.1.3.37)	GLOIN_2v1495829 RIR_1970200	458	24.9528	17
A0A2H5SXP4	M protein repeat protein	RIR_1972000	1010	28.2975	38.4
A0A2H5SXQ4	Uncharacterized protein	RIR_1972810	449	24.8272	15.6
A0A2H5SXQ9	Multifunctional fusion protein [Includes: L-glutamate gamma-semialdehyde dehydrogenase	RIR_1971900	513	32.0049	66.1
A0A2H5SXR2	Prephenate dehydrogenase [NADP(+)] (PRDH) (EC 1.3.1.13)	RIR_1972900	433	28.0128	53.3
A0A2H5SXS7	Acidic leucine-rich nuclear phosphoprotein 32 family member b isoform x3	RIR_1973900	329	26.7915	28.9
A0A2H5SXS6	Pheromone receptor transcription factor	RIR_1974500	290	25.8531	19
A0A2H5SXT3	SWI/SNF-related matrix-associated actin-dependent regulator of chromatin subfamily A3	RIR_1974400	953	24.2051	7.7
A0A2H5SXX7	Non-specific serine/threonine protein kinase (EC 2.7.11.1)	RIR_1978400	696	25.5682	14.9	Class C
A0A2H5SY08	D-fructose-6-phosphate amidotransferase (EC 2.6.1.16) (Hexosephosphate aminotransferase)	RIR_1981700	703	32.1091	81.7
A0A2H5SY21	Chitin synthase export chaperone	RIR_1981400	316	23.1912	10.1
A0A2H5SY25	Serine/threonine-protein kinase 24/25/MST4	RIR_1982800	444	24.5524	16.2	Class C
U9SS39	Phosphopantothenate-cysteine ligase (Putative phosphopantothenate-cysteine ligase)	GLOIN_2v1668342 GLOINDRAFT_339478 RIR_1982300	325	26.7612	45.5
A0A2H5SY32	High-mobility group non-histone protein	RIR_1983300	320	26.5889	25.3
A0A2H5SY37	40S ribosomal protein S2	GLOIN_2v1668274 RIR_1983100	269	31.3936	56.1
A0A2H5SY40	Ubiquitin conjugating enzyme E2 (Ubiquitin-conjugating enzyme E2 G1)	GLOIN_2v1668171 RIR_1983800	171	26.3896	14.6
A0A2H5SY44	Thiol-disulfide exchange intermediate	GLOIN_2v1668179 RIR_1983700	280	29.2878	55
A0A2H5SY57	Aaa family ATPase cdc48	RIR_1972800	797	32.1218	65.5
A0A2H5SY59	Cys-Gly metallodipeptidase DUG1	RIR_1985300	479	29.4098	25.5
A0A2H5SY67	Uncharacterized protein	RIR_1986500	1038	23.2236	6.4
A0A2H5SY75	Alkaline phosphatase (EC 3.1.3.1)	RIR_1986800	536	26.5706	34.1
A0A2H5SY80	Uncharacterized protein	GLOIN_2v160065 RIR_1987000	115	23.3443	40.9
A0A2H5SY83	Protein SCO1/2	RIR_1986900	295	25.1228	19
A0A2H5SY84	Cullin 4 (Cullin-4B-like)	GLOIN_2v1623626 RIR_1987600	843	26.6967	17.9
A0A2H5SY92	60S ribosomal protein L37 (60s ribosomal protein l37a)	GLOIN_2v1623628 RIR_1987700	92	28.7803	48.9
A0A2H5SY98	Vacuolar protein sorting-associated protein 27	GLOIN_2v1623648 RIR_1988100	700	25.359	13.4
A0A2H5SYD1	Arm repeat-containing protein	RIR_1991600	103	25.7221	47.6
A0A2H5SYD3	Amphiphysin	GLOIN_2v1623823 RIR_1991500	413	26.9744	27.4
A0A2H5SYD5	Acetolactate synthase I/II/III large subunit	RIR_1992000	666	27.2446	40.1
A0A2H5SYE1	Inorganic diphosphatase (EC 3.6.1.1)	RIR_1992500	273	29.3649	76.6
A0A2H5SYE3	Carnitine O-acetyltransferase	RIR_1992400	567	28.9885	48
A0A2H5SYF0	Arm repeat-containing protein	RIR_1991700	259	26.8102	49.4
A0A2H5SYG0	Chitin synthase regulator 3	RIR_1994400	777	24.697	9.1
A0A2H5SYG1	ATP-binding cassette, subfamily D (ALD), peroxisomal long-chain fatty acid import protein	RIR_1994200	696	28.2967	34.8
A0A2H5SYG9	Precorrin-2 dehydrogenase (EC 1.3.1.76)	RIR_1993600	1315	25.2309	14.1
A0A2H5SYH2	LMBR1 domain-containing protein 1	GLOIN_2v1758490 RIR_1995000	546	25.4748	6.4
A0A2H5SYH6	Charged multivesicular body protein 2A (Putative vacuolar sorting protein DID4)	GLOIN_2v1668152 RIR_1984000	220	24.9883	16.8
A0A2H5SYI1	Nuclear segregation protein bfr1	RIR_1994300	467	25.9908	20.1
A0A2H5SYI5	Ubiquinol-cytochrome c reductase subunit 6	GLOIN_2v1703346 RIR_1996100	100	25.2567	23
A0A2H5SYI8	Dynamin-related GTPase mgm1	RIR_1996500	953	28.0824	29.3
A0A2H5SYJ2	Defective in cullin neddylation protein	RIR_1996400	260	27.7682	33.1
A0A2H5SYJ6	Nuclear and cytoplasmic polyadenylated RNA-binding protein pub1	RIR_1996300	376	28.4276	54.8
A0A2H5SYK3	Ribosomal 60S subunit protein L22 (Ribosomal protein L22e)	GLOIN_2v1703429 RIR_1996700	130	30.9575	61.5
A0A2H5SYK4	SURF1-like protein	RIR_1996900	303	23.3446	15.5
A0A2H5SYL1	3-hydroxyisobutyryl-CoA hydrolase, mitochondrial (EC 3.1.2.4) (3-hydroxyisobutyryl-coenzyme A hydrolase)	RIR_1996600	526	26.441	24.1
A0A2H5SYM9	Ap-1 adaptor complex subunit beta subunit	RIR_1999900	989	24.6831	4.3
A0A2H5SYN3	Eukaryotic translation initiation factor 3 subunit H (eIF3h)	GLOIN_2v1466658 RIR_1999500	360	28.4487	56.9
A0A2H5SYQ5	Ubiquitinyl hydrolase 1 (EC 3.4.19.12)	GLOIN_2v1714535 RIR_1999800	354	27.634	32.5
A0A2H5SYW5	Kexin	RIR_1994000	774	24.2958	9.2
A0A2H5SZ62	NADH:ubiquinone reductase (non-electrogenic) (EC 1.6.5.9)	RIR_2016500	582	27.7984	41.2
A0A2H5SZN7	Aminomethyltransferase (EC 2.1.2.10) (Glycine cleavage system T protein)	RIR_2018600	415	28.987	48
A0A2H5SZ90	Dynein intermediate chain	RIR_2018700	642	25.1851	14.5
A0A2H5SZC0	Methionine aminopeptidase (EC 3.4.11.18)	RIR_2021500	373	23.82	11.8
A0A2H5SZC3	F-box/lrr-repeat protein 14	RIR_2007900	954	26.5774	27
A0A2H5SZC4	Methionine aminopeptidase (EC 3.4.11.18)	GLOIN_2v1744343 RIR_2021900	373	26.0493	23.3
A0A2H5SZC5	Peroxiredoxin	RIR_2022000	197	31.7445	73.6
A0A2H5SZG0	Uncharacterized protein	GLOIN_2v1762614 RIR_2024400	616	27.2678	28.1
A0A2H5SZH0	Hsp70 family protein	RIR_2024700	543	23.9549	13.1
A0A2H5SZI0	Hsp70 family protein	RIR_2026000	520	27.4423	27.9
A0A2H5SZJ2	Hsp70 family protein	RIR_2024500	552	24.3498	12.5
A0A2H5SZJ4	Cerevisin	RIR_2027100	376	23.034	19.1
A0A2H5SZL1	Uncharacterized protein	RIR_2026100	542	26.3985	21.4
A0A2H5SZL9	Endopeptidase	RIR_2028600	395	27.0227	26.6
A0A2H5SZP3	MMS19 nucleotide excision repair protein	GLOIN_2v1762658 RIR_2028400	1049	25.5665	17.2
A0A2H5SZQ0	Mitogen-activated protein kinase kinase	RIR_2031400	317	28.1796	42.6
A0A2H5SZT8	Abc transporter protein	RIR_2034700	984	24.9404	11.5
A0A2H5T085	Ino80 complex subunit iec3	RIR_2034800	324	23.605	16.7
A0A2H5SZW3	Uncharacterized protein	RIR_2034300	248	25.6349	21.4
A0A2H5U7D8	Uncharacterized protein	RIR_3236100	119	23.2506	27.7
A0A2H5T034	Rab proteins geranylgeranyltransferase component	RIR_2043400	542	23.0458	6.6
A0A2H5T042	26S proteasome non-ATPase regulatory subunit 9	RIR_2043800	186	25.0182	30.1
A0A2H5T047	Transcription initiation factor TFIID subunit 10	GLOIN_2v1651775 RIR_2043700	170	23.8184	24.1
A0A2H5T071	Cell cycle arrest in response to pheromone-related protein	RIR_2045900	548	26.8955	34.3
A0A2H5T074	Zinc knuckle transcription factor	RIR_2045700	1523	30.8502	59.4
A0A2H5T078	Xanthine phosphoribosyltransferase (Predicted)	RIR_2034000	189	27.4186	57.7
A0A2H5T0A5	Lipase ATG15	RIR_2047100	421	23.5983	17.1
A0A2H5T0A8	Putative translation elongation factor 2 (Ribosome assembly protein 1)	GLOIN_2v1651430 RIR_2046000	1080	24.0326	7.9
A0A2H5T0F1	Pq loop repeat protein	GLOIN_2v1726945 RIR_2052200	306	26.2652	13.4
A0A2H5T0H3	Calcineurin temperature suppressor cts1	GLOIN_2v1726817 RIR_2053300	129	32.6118	81.4
A0A2H5T0H5	Calcineurin temperature suppressor cts1	GLOIN_2v1726827 RIR_2053100	128	32.5874	90.6
A0A2H5T0N7	Fumarate hydratase (EC 4.2.1.2)	GLOIN_2v1528645 RIR_2059700	493	29.5017	60.4
A0A2H5T0P1	Endoribonuclease Dicer	RIR_2059200	567	23.3242	13.6	RNAi-related
A0A2H5T0U4	ER membrane protein complex subunit 3	GLOIN_2v1509528 RIR_2064000	301	25.0521	15.9
A0A2H5T0U6	Putative NADPH oxidase	RIR_2064900	496	23.8335	17.1
A0A2H5T0V2	GTP-binding nuclear protein	RIR_2065000	239	31.1608	57.3
A0A2H5T0V3	Sorting nexin	RIR_2065200	517	25.8659	19.3
A0A2H5T0W0	CPSF A subunit region-domain-containing protein (DNA damage-binding protein 1)	GLOIN_2v1744924 RIR_2065500	1122	26.7255	20
A0A2H5T0V8	Chitin deacetylase	RIR_2053500	322	28.267	26.7
A0A2H5T116	Expressed protein	GLOIN_2v1648923 RIR_2070400	396	23.0177	7.8
A0A2H5T139	Copii-coated vesicle component	RIR_2061000	240	27.5841	32.9
A0A2H5T142	Uncharacterized protein	RIR_2071600	219	27.8149	29.7
A0A2H5T161	14-3-3 protein epsilon	RIR_2073600	270	31.5858	50.4
A0A2H5T163	Glyoxylate reductase	RIR_2073400	152	24.7074	26.3
A0A2H5T165	Serine/threonine-protein phosphatase (EC 3.1.3.16)	RIR_2073200	2256	29.5437	16.3
A0A2H5T1B7	Serine/threonine protein kinase	RIR_2077700	1288	23.27	3.3	Class C
A0A2H5T1J8	Ubiquitin-conjugating enzyme E2 Q	RIR_2073700	1218	26.7409	15.6
A0A2H5T203	Crinkler family protein	RIR_2096400	500	27.3479	33.8	Putative effector
A0A2H5T210	Uncharacterized protein	GLOIN_2v1674984 RIR_2087200	219	24.5824	32.9
A0A2H5T2A3	Alpha/beta hydrolase	RIR_2103700	188	31.1477	61.7
A0A2H5T2R3	Glycosyl hydrolase	RIR_2112200	681	30.7616	57.9
A0A2H5T2T0	Tripeptidyl-peptidase II (EC 3.4.14.10)	RIR_2114100	1372	33.1311	65.2
A0A2H5T2Y6	Sodium/potassium-transporting ATPase subunit alpha	RIR_2117800	1211	29.8301	45.8
A0A2H5T315	Kinesin family member 1	RIR_2120800	1604	24.3472	5.5
A0A2H5T321	Uncharacterized protein	RIR_2122400	336	23.86	10.4
A0A2H5T331	60S ribosomal protein L5	RIR_2122900	275	31.7295	50.5
A0A2H5T338	Chromatin structure-remodeling complex subunit RSC9	RIR_2122200	729	24.074	8.8
A0A2H5T346	ATP-binding cassette, subfamily B (MDR/TAP), member 1 (P-loop containing nucleoside triphosphate hydrolase protein)	GLOIN_2v1593654 RIR_2124000	1355	26.4776	15.4
A0A2H5T354	Ser/thr protein phosphatase family protein	RIR_2123200	1551	27.0489	11.6
A0A2H5T366	Lysophospholipase (EC 3.1.1.5)	RIR_2125400	656	28.3769	39.8
A0A2H5T389	FIST domain-containing protein	GLOIN_2v1593322 RIR_2126000	461	24.3301	14.8
A0A2H5T3B5	Nmra-like family protein	GLOIN_2v1481424 RIR_2128400	314	28.1547	43
A0A2H5T3B7	Conserved fungal protein	RIR_2129300	768	25.8185	15.5
A0A2H5T3C1	Nmra-like family protein	RIR_2128500	263	32.9249	63.9
A0A2H5T3F6	Phosphoserine phosphatase	RIR_2131900	650	28.561	49.8
A0A2H5T3H0	Serine/threonine protein phosphatase 5 phosphatase, putative	RIR_2131800	769	28.6654	44.9
A0A2H5T3P1	Acyl-coenzyme A oxidase	GLOIN_2v1629159 RIR_2139000	681	26.3935	27.8
A0A2H5T3T0	Heat shock protein 90kDa beta (Hsp90 protein)	GLOIN_2v1753453 RIR_2140500	803	29.7327	33.4
A0A2H5T3W4	E3 ubiquitin-protein ligase listerin (EC 2.3.2.27) (RING-type E3 ubiquitin transferase listerin)	GLOIN_2v1776229 RIR_2144600	1728	24.9763	8.6
A0A2H5T3Z1	Multidrug resistance-associated protein 1-like	RIR_2147200	1385	23.6879	4.1
A0A2H5T401	Calcium binding protein caleosin	RIR_2148100	347	29.123	38.3
A0A2H5T405	Protein YOP1	GLOIN_2v136030 RIR_2147400	163	26.4799	35.6
A0A2H5T479	Alpha carbonic anhydrase (Carbonic anhydrase)	GLOIN_2v1477498 RIR_2153100	263	25.7504	25.1
A0A2H5T4A6	Methylenetetrahydrofolate reductase (EC 1.5.1.20)	GLOIN_2v1619827 RIR_2145400	596	24.6194	7.2
A0A2H5T4V8	Crinkler family protein, putative	RIR_2170900	809	25.4483	9.4	Putative effector
A0A2H5T4Z4	Calpain-7	RIR_2173200	938	22.9462	3.5
A0A2H5T4Z5	A1 cistron-splicing factor (A1 cistron-splicing factor AAR2)	GLOIN_2v1609348 RIR_2173800	372	24.5161	17.7
A0A2H5T504	Fe-S cluster assembly protein DRE2 (Anamorsin homolog)	DRE2 RIR_2174600	294	27.6455	67.7
A0A2H5T527	mRNA polyadenylation-related protein	RIR_2174100	880	24.6683	8
A0A2H5T507	RNA-binding protein	RIR_2174200	140	29.1592	50.7
A0A2H5T517	E3 ubiquitin-protein ligase NEDD4	RIR_2175100	426	24.93	14.8
A0A2H5T524	E3 ubiquitin-protein ligase NEDD4	RIR_2175000	299	24.585	18.7
A0A2H5T583	COX assembly mitochondrial protein	RIR_2181100	86	23.7195	37.2
A0A2H5T587	GTP-binding protein	RIR_2181200	302	23.7461	10.6
A0A2H5T589	NEDD8-activating enzyme E1 catalytic subunit (EC 6.2.1.64)	RIR_2181400	435	28.5147	56.3
A0A2H5T5A6	Uncharacterized protein	GLOIN_2v1726323 RIR_2182800	679	25.2737	10.3
A0A2H5T5A8	Serine/threonine-protein phosphatase (EC 3.1.3.16)	RIR_2183400	650	25.5099	17.8
A0A2H5T5B0	Kynureninase (EC 3.7.1.3) (Biosynthesis of nicotinic acid protein 5) (L-kynurenine hydrolase)	BNA5 RIR_2183000	618	29.9344	42.7
A0A2H5T5B6	Translation machinery-associated protein 20	RIR_2183600	71	25.7132	62
A0A2H5T5C1	Tellurium resistance protein terz-like, partial	RIR_2183300	333	25.7665	23.1
A0A2H5T5D9	Glycosyltransferase-like protein LARGE	RIR_2186100	425	23.1648	13.2
A0A2H5T5E7	Ubiquitin	RIR_2186600	525	26.5968	6.7
A0A2H5T5G6	60S ribosomal protein L9	RIR_2188100	112	29.9696	66.1
A0A2H5T5H0	DNA mismatch repair protein	RIR_2187800	1173	23.4127	7.8
A0A2H5T5H2	Geranylgeranyl diphosphate synthase, type III	RIR_2186700	314	27.139	48.7
A0A2H5T5H3	Nuclear movement protein nudc	RIR_2188000	253	29.0961	44.3
A0A2H5T5I2	Cytidine deaminase-like protein (Drap deaminase)	GLOIN_2v1478664 RIR_2175400	147	24.0866	29.3
A0A2H5T5I4	Putative Prolactin regulatory element-binding protein	RIR_2188200	363	26.3402	28.7
A0A2H5T5I5	GPN-loop GTPase (EC 3.6.5.-)	RIR_2186300	370	23.2176	17
A0A2H5T5I9	Glyceraldehyde-3-phosphate dehydrogenase (EC 1.2.1.12)	RIR_2190100	349	34.3049	56.4
A0A2H5T5J4	Eukaryotic translation initiation factor 3 subunit II	TIF34 RIR_2188500	307	28.2376	52.8
A0A2H5T5J7	Cerevisin	RIR_2189800	465	31.6558	46.2
A0A2H5T5J9	Adenylyl cyclase-associated protein	RIR_2190400	515	28.7039	43.1
A0A2H5T5K7	Ribosomal RNA-processing protein 40	GLOIN_2v1687376 RIR_2190600	243	24.7856	20.6
A0A2H5T5M1	Membrane protein, putative	RIR_2191400	245	25.415	30.2
A0A2H5T5N4	Protein acetyllysine N-acetyltransferase (EC 2.3.1.286)	RIR_2190300	461	27.1112	32.5
A0A2H5T5P5	Btb/poz domain-containing protein 19-like	RIR_2192100	460	24.2119	8.3	Class C
A0A2H5T5R5	CCR4-NOT transcription complex subunit 4	RIR_2181700	1270	24.0342	2.5
A0A2H5T5X4	Phosphatidylserine decarboxylase (Phosphatidylserine decarboxylase-related protein)	GLOIN_2v1630447 RIR_2199600	404	25.8301	15.8
A0A2H5T5X6	Phosphatidylserine decarboxylase family protein	RIR_2199800	343	27.1354	20.1
A0A2H5T6H9	Ubiquitin conjugating enzyme (UbcD), putative (Ubiquitin-conjugating enzyme E2 D)	GLOIN_2v1550602 RIR_2214000	149	24.6874	50.3
A0A2H5T6J1	Pirin domain protein	RIR_2214800	302	23.5641	13.9
A0A2H5T6Q2	Kelch-like protein 21	RIR_2221000	481	26.8584	35.3	Class C
A0A2H5T6R4	Btb/poz domain-containing protein 9	RIR_2222600	474	26.4476	25.1	Class C
A0A2H5T6R7	Btb/poz domain-containing protein 9	GLOIN_2v1636747 RIR_2222700	479	30.6457	40.3	Class C
A0A2H5T6T2	Btb/poz domain-containing protein 9	GLOIN_2v1636722 RIR_2222500	475	28.1598	49.5	Class C
A0A2H5T6V1	Phosphatidylinositol glycan, class F	GLOIN_2v1878288 RIR_2222800	265	24.0264	7.9
A0A2H5T6W8	Btb/poz domain-containing protein 19-like	GLOIN_2v1878318 RIR_2226100	471	23.9015	11.9	Class C
A0A2H5T718	Serine-enriched protein	RIR_2230200	477	23.0631	4
A0A2H5T731	Bifunctional cysteine synthase/O-acetylhomoserine aminocarboxypropyltransferase MET17	RIR_2230000	456	25.9177	32.5
A0A2H5T764	Uncharacterized protein	RIR_2234800	464	24.2834	11.6
A0A2H5T782	Bifunctional cysteine synthase/O-acetylhomoserine aminocarboxypropyltransferase MET17	RIR_2235200	432	26.1725	34.5
A0A2H5T7A2	ADP-ribosylglycohydrolase	RIR_2237400	514	25.0329	14.2
A0A2H5T7A5	PB1 domain-containing protein	RIR_2237800	431	23.6616	11.1
A0A2H5T7C7	Non-specific serine/threonine protein kinase (EC 2.7.11.1)	RIR_2236600	614	28.3049	40.6	Class C
A0A2H5T7F3	Carbohydrate-binding module family 18/carbohydrate esterase family 4 protein (Chitin deacetylase)	GLOIN_2v1480904 RIR_2240400	322	30.2676	51.9
A0A2H5T7I4	Autophagy-related protein 26	RIR_2242700	1606	23.2701	2.2
A0A2H5T7I9	Ribosomal protein L15	GLOIN_2v1638933 RIR_2243500	204	29.1063	32.8
A0A2H5T7J3	Leucine-rich repeat-containing protein 40 isoform x1	RIR_2243400	1014	26.358	16.7
A0A2H5T7N8	DNA polymerase epsilon subunit c	RIR_2245100	993	27.5741	23.6
A0A2H5T7K6	Ras-GEF domain-containing protein	GLOIN_2v1681113 RIR_2246000	806	23.9563	4.3
A0A2H5T7L7	ARGININE/SERINE RICH PRE-mRNA SPLICING FACTOR	RIR_2246600	285	26.4085	25.3
A0A2H5T7L8	Hypothetical integral membrane protein	RIR_2243200	966	26.6623	12.6
A0A2H5T7L9	Mitochondrial inorganic phosphate transporter (Predicted)	RIR_2246200	308	31.9087	76.6
A0A2H5T7M2	60S ribosomal protein L7	RIR_2246100	250	31.5535	64
A0A2H5T7Q6	Mannose-1-phosphate guanylyltransferase	RIR_2248100	370	28.9161	63
A0A2H5T7R8	Cytoplasm protein	RIR_2247500	329	22.8554	8.8
A0A2H5T7U6	Stomatin-like protein	RIR_2253400	316	23.4872	8.5
A0A2H5T7V7	3'(2'),5'-bisphosphate nucleotidase (EC 3.1.3.7)	GLOIN_2v1638669 RIR_2241100	331	28.712	40.2
A0A2H5T7V8	Kelch-like protein 17	RIR_2253000	442	25.4626	31.2	Class C
A0A2H5T7X7	Calcineurin temperature suppressor cts1	RIR_2255200	191	24.544	13.1
A0A2H5T7Z6	Nod3 protein	RIR_2243600	631	24.7983	16.3
A0A2H5T823	High-mobility group non-histone protein	RIR_2246300	385	26.9832	30.1
A0A2H5T8D9	B30.2/SPRY domain-containing protein	RIR_2267300	352	28.0966	43.2
A0A2H5T8Q3	Uncharacterized protein	RIR_2275000	332	27.9177	31
A0A2H5T8S3	Uncharacterized protein	GLOIN_2v1738391 RIR_2280200	417	23.5894	9.6
A0A2H5T8Y0	Serine/threonine protein kinase	RIR_2284900	738	23.8764	7.5	Class C
A0A2H5T926	Uncharacterized protein	GLOIN_2v1614394 RIR_2288900	174	28.7856	67.2
A0A2H5T9R1	Serine/threonine/tyrosine protein kinase rad53	RIR_2308600	703	23.7624	9.7	Sex and meiosis
A0A2H5T9R9	Serine/threonine protein kinase	RIR_2308300	460	23.2503	6.5	Class C
A0A2H5T9V9	Ubiquitin domain-containing protein	RIR_2312400	371	23.1816	10.5
A0A2H5T9X8	Kinase-like domain-containing protein (Sterile alpha motif and leucine zipper containing kinase AZK)	GLOIN_2v1597781 RIR_2314100	497	23.3754	12.7
A0A2H5TA06	Putative lipase, class 3	RIR_2315500	563	31.2732	57.4
A0A2H5TA75	Uncharacterized protein	RIR_2322000	301	24.9325	20.6
A0A2H5TAD3	Non-heme chloroperoxidase	RIR_2326700	341	27.9949	41.9
A0A2H5TAS0	La-related protein 1	GLOIN_2v1505907 RIR_2338400	973	24.6852	13.4
A0A2H5TAT8	Phosphoenolpyruvate carboxykinase (ATP)	RIR_2338200	210	30.4223	41
A0A2H5TAU3	Rwd domain protein	RIR_2340400	240	23.7373	8.8
A0A2H5TAU4	Phosphoenolpyruvate carboxykinase (ATP) (EC 4.1.1.49)	RIR_2338300	349	32.4949	73.1
A0A2H5TAU5	AMPK1_CBM domain-containing protein	RIR_2338600	1044	28.2499	27.3
A0A2H5TAV3	Uncharacterized protein	RIR_2341100	428	27.4054	19.6
A0A2H5TAW6	Acylpyruvate hydrolase	RIR_2340300	202	26.5216	41.6
A0A2H5TAX7	Uncharacterized protein	GLOIN_2v1506258 RIR_2341000	358	32.2117	79.9
A0A2H5TAY2	Protein serine/threonine kinase	RIR_2343000	192	27.2037	34.4	Class C
A0A2H5TB25	Serine/threonine protein kinase	RIR_2335800	459	27.0849	37.9	Class C
A0A2H5TB34	Adenylyl-sulfate kinase (EC 2.7.1.25)	RIR_2347200	167	25.4343	29.3
A0A2H5TB43	Selenoprotein O	RIR_2346700	532	25.265	20.9
A0A2H5TB65	von willebrand domain-containing protein	RIR_2338900	820	28.0046	17.4
A0A2H5TB69	Integral membrane protein 25d9-6	GLOIN_2v1506759 RIR_2347000	221	26.4207	26.7
A0A2H5TB70	88 kDa immunoreactive mannoprotein mp88	GLOIN_2v1447817 RIR_2347400	176	30.0186	51.1
A0A2H5TB77	Histone H4	GLOIN_2v1506718 RIR_2346600	123	27.0212	52	Histone and histone modification
A0A2H5TB81	Carboxypeptidase S1	RIR_2350400	470	25.5983	27.9
A0A2H5TBB2	Carboxypeptidase (EC 3.4.16.-)	RIR_2350300	444	27.5838	28.4
A0A2H5TBB8	Dihydrofolate synthetase (EC 6.3.2.12)	RIR_2351300	415	24.4848	12.3
A0A2H5TBH5	CTP synthase (EC 6.3.4.2) (UTP--ammonia ligase)	RIR_2357000	589	27.2018	34.1
A0A2H5TBI5	Peroxiredoxin Q/BCP	RIR_2357700	158	30.1174	76.6
A0A2H5TBK2	Uncharacterized protein	RIR_2359500	350	24.9305	15.4
A0A2H5TBM5	Proteasome subunit beta (EC 3.4.25.1)	GLOIN_2v1450681 RIR_2361700	194	29.9832	49.5
A0A2H5TBQ6	Endosome-associated ubiquitin isopeptidase	RIR_2364200	451	23.9206	13.1
A0A2H5TBR0	Cohesin complex subunit SA-1/2	RIR_2364400	1711	24.1044	4.6
A0A2H5TBT9	Expressed protein	RIR_2365300	839	27.228	14.9
A0A2H5TBW8	40S ribosomal protein S4	RIR_2369400	230	31.7575	60.4
A0A2H5TC13	Sister chromatid cohesion protein pds5	RIR_2369900	1232	23.6845	3.6
A0A2H5TBY5	Transformer-2 protein	RIR_2368300	290	23.23	4.1
A0A2H5TBY9	Protein serine/threonine kinase	RIR_2371700	198	28.1918	62.1	Class C
A0A2H5TC24	Elongation factor-2 kinase efk-1b isoform	RIR_2371600	198	24.2093	29.8
A0A2H5TBZ1	Ubiquitin-conjugating enzyme E2 R	RIR_2369300	244	26.456	28.7
A0A2H5TBZ3	Mhck/ef2 kinase domain protein	RIR_2371800	155	25.896	36.8
A0A2H5TBZ5	Outer membrane protein insertion porin family	RIR_2369700	471	28.2779	47.8
A0A2H5TC04	Uncharacterized protein	RIR_2372000	554	24.7766	23.8
A0A2H5TC11	ATP synthase subunit d, mitochondrial	RIR_2364300	115	30.172	70.4
A0A2H5TC15	Eukaryotic translation initiation factor 4e	RIR_2373500	492	25.242	18.7
A0A2H5TC21	Vesicle-associated membrane protein 712	RIR_2373800	221	28.4469	57.5
A0A2H5TC22	Pih1 domain-containing protein 1	GLOIN_2v1547855 RIR_2374000	332	23.6702	19.9
A0A2H5TC23	N-alpha-acetyltransferase 30	RIR_2374100	848	29.2885	38.9
A0A2H5TC27	Uncharacterized protein	RIR_2374800	101	26.5566	44.6
A0A2H5TC30	Chloroperoxidase (Peroxidase)	GLOIN_2v1451386 RIR_2374700	221	25.2986	41.6
A0A2H5TC38	1,4-alpha-glucan-branching enzyme (EC 2.4.1.18) (Glycogen-branching enzyme)	RIR_2374500	640	31.4892	68.9
A0A2H5TC55	Lectin, mannose-binding 2	RIR_2377400	310	27.0207	26.5
A0A2H5TC57	Ubiquitin-like modifier-activating enzyme ATG7 (Autophagy-related protein 7)	RIR_2374200	700	28.8137	51
A0A2H5TC70	26S proteasome regulatory subunit RPN1	GLOIN_2v1707863 RIR_2369500	888	30.8111	66.8
A0A2H5TC90	Pyruvate dehydrogenase E1 component subunit beta (EC 1.2.4.1)	RIR_2376900	377	29.5412	44.3
A0A2H5TC95	Hsp70 family protein	GLOIN_2v1547973 RIR_2372100	573	27.9651	31.1
A0A2H5TCA5	Poly(ADP-ribose) glycohydrolase (EC 3.2.1.143)	RIR_2377600	347	27.7785	35.2
A0A2H5TCB3	BTB/POZ protein (Gl16304)	GLOIN_2v1547875 RIR_2373700	369	25.5762	23	Class C
A0A2H5TCF6	Protein transport protein SEC13	RIR_2377100	294	27.8766	38.8
A0A2H5TCJ6	Ragulator complex protein lamtor1-like	GLOIN_2v1505095 RIR_2388800	194	24.5308	19.1
A0A2H5TCK2	Ubiquitin C	RIR_2389500	168	24.8448	23.8
A0A2H5TCK6	Uncharacterized protein	RIR_2389800	1321	26.1982	16.1
A0A2H5TCK8	Uncharacterized protein	GLOIN_2v1868009 RIR_2389700	177	30.4462	48.6
A0A2H5TCL2	Peptidylprolyl isomerase (EC 5.2.1.8)	RIR_2389300	155	29.0626	34.8
A0A2H5TCN6	Uncharacterized protein	GLOIN_2v1505244 RIR_2390700	171	28.9453	48
A0A2H5TCT0	3-hydroxyacyl-CoA dehydrogenase	RIR_2389100	333	30.008	60.1
A0A2H5TD02	Serine/threonine-protein kinase ht1-like	RIR_2399600	448	27.5926	32.4	Class C
A0A2H5TD41	Glycoside hydrolase family 63 protein (Mannosyl-oligosaccharide glucosidase)	GLOIN_2v1701873 RIR_2404600	807	23.3542	13.4
A0A2H5TDC6	Uncharacterized protein	RIR_2412700	249	27.5907	42.2
A0A2H5TDL5	Ion_trans domain-containing protein	GLOIN_2v1644706 RIR_2420100	1380	23.5278	7.2
A0A2H5TDY0	Serine-enriched protein	RIR_2418400	483	27.2798	31.5
A0A2H5TE44	Pre-mRNA-processing protein 45	RIR_2435100	554	24.9205	17.1
A0A2H5TE53	Transient receptor potential ion channel protein	RIR_2432700	1390	23.1499	3.7
A0A2H5TE76	S-methyl-5'-thioadenosine phosphorylase	GLOIN_2v1461254 RIR_2434200	311	28.4132	56.3
A0A2H5TE94	Deha2e20614p	RIR_2435800	366	25.2691	19.4
A0A2H5TEQ7	Cytochrome oxidase complex assembly protein COA1	RIR_2450800	198	23.7216	13.1
A0A2H5TER3	Pre-mRNA 3'-end processing cleavage and polyadenylation factor	RIR_2452100	1007	25.134	9
A0A2H5TES7	Putative cell division control protein CDC3 (Septin protein)	GLOIN_2v1685389 RIR_2452500	424	29.711	66
A0A2H5TEU0	Zinc finger domain-containing protein	GLOIN_2v1817684 RIR_2455700	688	27.557	10.6
A0A2H5TEU7	Apoptosis inhibitor 5	RIR_2452300	552	26.5487	30.8
A0A2H5TEV2	DNAJ domain protein, DNAJC11 family	GLOIN_2v1717485 RIR_2456200	596	23.8427	9.1
A0A2H5TEV3	Cation-transporting ATPase (EC 7.2.2.-)	RIR_2455300	1060	26.5667	15.8
A0A2H5TEW0	Calmodulin-dependent protein kinase	RIR_2457300	688	29.302	27	Class C
A0A2H5TEW7	Serine/threonine/tyrosine protein kinase rad53	RIR_2453900	1343	25.465	10	Sex and meiosis
A0A2H5TEY7	Alpha glucosidase II, alpha	RIR_2455500	889	26.7715	24.4
A0A2H5TEY9	Eukaryotic translation initiation factor 2C 2	GLOIN_2v1516785 RIR_2459200	838	24.8607	14.2	RNAi-related
A0A2H5TEZ5	Eukaryotic translation initiation factor 2C 2	GLOIN_2v1764424 RIR_2459400	826	24.0692	12.5	RNAi-related
A0A2H5TF02	Serine/threonine protein kinase	RIR_2460200	942	24.6923	12.1	Class C
A0A2H5TF11	Apolipoprotein n-acyltransferase	RIR_2451000	479	26.8611	24.8
A0A2H5TF38	Eukaryotic translation initiation factor 2C 2	GLOIN_2v1745457 RIR_2459300	830	26.7599	24.5	RNAi-related
A0A2H5TFB2	DNA topoisomerase 2 (EC 5.6.2.2) (DNA topoisomerase II)	RIR_2468300	1898	25.193	2.7
A0A2H5TFE3	E2 ubiquitin-conjugating protein (Ubiquitin-conjugating enzyme E2 D)	GLOIN_2v1515368 RIR_2470500	148	27.4395	37.2
A0A2H5TFV4	Regulator of chromosome condensation rcc1, partial	GLOIN_2v1725885 RIR_2483400	588	25.1986	17.2
A0A2H5TFW8	Uncharacterized protein	RIR_2485100	220	28.0853	20.9
A0A2H5TFZ6	Cyclin-dependent serine/threonine-protein kinase pho85	RIR_2486900	302	25.5572	32.5	Class C
A0A2H5TG03	Pb1 domain protein	RIR_2487400	590	25.7216	18.8
A0A2H5TG27	Seryl-tRNA synthetase (EC 6.1.1.11) (Seryl-tRNA(Ser/Sec) synthetase)	RIR_2490200	474	23.2405	13.5
A0A2H5TG29	Uncharacterized protein	GLOIN_2v1520982 RIR_2489500	116	25.7759	46.6
A0A2H5TG55	T-complex protein 1 subunit epsilon	RIR_2492700	226	29.9878	77.9
A0A2H5TG59	Kelch-like protein 17	RIR_2492100	472	28.0429	38.8	Class C
A0A2H5TG63	T-complex protein 1 subunit epsilon	RIR_2492600	261	30.5026	67.8
A0A2H5TG69	Translation elongation facter 1-alpha	RIR_2492800	528	28.4216	43.6
A0A2H5TG85	Oxidoreductase, 2og-Fe(II) oxygenase family	RIR_2494600	348	25.2048	21.6
A0A2H5TG86	Splicing factor 3B subunit 2	RIR_2494800	490	24.8513	9
A0A2H5TG88	Ubiquitin conjugating enzyme E2	RIR_2493700	142	23.7507	43
A0A2H5TG90	Metalloenzyme, LuxS/M16 peptidase-like protein (Zinc metalloprotease)	GLOIN_2v1521324 RIR_2493800	1007	30.2632	47
A0A2H5TGB2	Uncharacterized protein	RIR_2495900	490	27.7398	18.8
A0A2H5TGB7	Enoyl-coa hydratase/isomerase family protein	RIR_2497200	387	28.1517	27.9
A0A2H5TGE5	Uncharacterized protein	RIR_2498900	573	28.012	25.5
A0A2H5TGE7	FAS-associated factor 2	RIR_2499000	376	27.7651	39.4
A0A2H5TGG0	E3 ubiquitin-protein ligase rnf213-like	RIR_2489800	6090	24.6967	5.4
A0A2H5TGH9	Iron-sulfur protein ribosome biogenesis translation initiation	RIR_2502300	602	28.5298	40.4
A0A2H5TGL5	Protein-L-isoaspartate O-methyltransferase (EC 2.1.1.77)	RIR_2505200	295	27.7856	45.4
A0A2H5TGM3	NADH dehydrogenase [ubiquinone] 1 beta subcomplex subunit 7	GLOIN_2v1618641 RIR_2504500	88	23.5341	25
A0A2H5TGM7	Structural maintenance of chromosomes protein	RIR_2506000	1377	23.2283	5
A0A2H5TH07	Endosomal peripheral membrane protein	RIR_2506400	703	26.2521	9.7
A0A2H5TGN3	ADP-ribose pyrophosphatase	RIR_2505300	461	26.2544	20
A0A2H5TGP1	General transcriptional repressor	RIR_2506700	678	28.5065	35.3
A0A2H5TGP0	Obg-like ATPase 1	RIR_2507200	425	29.7759	59.8
A0A2H5TGQ6	Flagellar attachment zone protein 1-like	RIR_2505000	832	25.2652	18.1
A0A2H5TGS1	Rho GTPase activating protein	RIR_2508300	598	23.301	7.9
A0A2H5TGS6	Iq domain-containing calmodulin-binding protein	RIR_2506600	475	28.3953	44.2
A0A2H5TGS7	Protein-serine/threonine kinase (EC 2.7.11.-)	RIR_2510400	288	28.0772	49	Class C
A0A2H5TGS8	Mitochondrial translation initiation factor 2 Ifm1p	RIR_2510000	1002	27.4273	7.8
A0A2H5TGT1	RNA-binding protein cabeza-like isoform x1	GLOIN_2v1617807 RIR_2510300	435	25.1693	23.4
A0A2H5TGU7	Polyadenylate tail-binding protein (Polyadenylate-binding protein, cytoplasmic and nuclear)	RIR_2510600	630	27.7999	27.9
A0A2H5TGU8	Translation machinery-associated protein 22	RIR_2511900	192	25.4548	8.9
A0A2H5TGV3	Homoserine dehydrogenase (EC 1.1.1.3)	RIR_2512000	320	28.9133	61.6
A0A2H5TGV9	ER to Golgi transport-related protein	RIR_2512800	1030	28.9901	33
A0A2H5TGX8	Ubiquitin protease cofactor glp1	GLOIN_2v1684506 RIR_2514300	744	25.9828	22.7
A0A2H5TGZ0	Acetyltransferase	RIR_2514700	121	26.752	47.1
A0A2H5TH02	ADP-ribosylation factor GTPase-activating protein 1	RIR_2515900	652	23.9646	11.2
A0A2H5TH18	Dnaj subfamily b member 5	RIR_2517900	458	25.6498	12
A0A2H5TH27	Srp40p	RIR_2514600	454	22.9923	5.5
A0A2H5TH72	Lipid droplet-associated perilipin protein	GLOIN_2v1710101 RIR_2521400	393	33.3577	81.9
A0A2H5THA1	Heme peroxidase, animal	RIR_2524600	1598	27.1012	12.1
A0A2H5THA8	Hypothetical integral membrane protein	GLOIN_2v1656080 RIR_2524700	848	24.9174	10.4
A0A2H5THB4	Ca2+-dependent lipid-binding protein	GLOIN_2v1655999 RIR_2525500	1335	30.3946	31.2
A0A2H5THC8	Ubx domain-containing protein 2	GLOIN_2v1783844 RIR_2515700	231	26.4144	36.8
A0A2H5THF5	Uncharacterized protein	RIR_2529400	249	27.4894	24.1
A0A2H5THM1	Endocytosis-related protein	GLOIN_2v1603818 RIR_2534500	929	23.1058	1.9
A0A2H5THM2	Polyvinylalcohol dehydrogenase (Quinon protein alcohol dehydrogenase-like superfamily)	GLOIN_2v1603808 RIR_2534200	532	29.9989	27.1
A0A2H5THM6	54S ribosomal protein L4, mitochondrial	GLOIN_2v1603903 RIR_2535700	187	23.8223	18.2
A0A2H5THM7	Glycosyltransferase family 20 protein (Trehalose-phosphatase)	GLOIN_2v1603843 RIR_2534800	777	29.114	48.4
A0A2H5THN8	RNA-binding protein	RIR_2535800	1151	26.0378	11.8
A0A2H5THQ2	Histone H2A	RIR_2535900	205	29.5616	36.1	Histone and histone modification
A0A2H5THS7	Long-chain-fatty-acid-CoA ligase	RIR_2539500	691	30.8921	52.7
A0A2H5THT5	AP complex subunit beta	GLOIN_2v1604283 RIR_2539400	695	27.7278	28.3
A0A2H5THT6	T-snare	RIR_2539100	269	26.8299	44.6
A0A2H5THT9	DNA-directed RNA polymerase subunit beta (EC 2.7.7.6)	RIR_2540400	1268	23.3405	3.2
A0A2H5THU5	Uncharacterized protein	GLOIN_2v1604326 RIR_2540300	177	23.6922	14.1
A0A2H5THX6	Uncharacterized protein	GLOIN_2v1604354 RIR_2540500	134	30.6498	70.1
A0A2H5TI30	Protein transport protein SEC23	GLOIN_2v1767798 RIR_2547300	760	29.4763	50.5
A0A2H5TI57	Complex I-B14.7 (NADH dehydrogenase [ubiquinone] 1 alpha subcomplex subunit 11)	RIR_2539200	134	25.0927	17.2
A0A2H5TIE0	Nucleoside diphosphate kinase (EC 2.7.4.6)	RIR_2555600	143	31.9276	83.2
A0A2H5TIE4	Ubiquitin carboxyl-terminal hydrolase (EC 3.4.19.12)	RIR_2556300	227	31.9676	85.5
A0A2H5TIE6	Mevalonate kinase (MK) (EC 2.7.1.36)	RIR_2546400	465	27.0405	52.7
A0A2H5TIE8	Translationally-controlled tumor protein homolog	RIR_2556800	121	29.8213	62.8
A0A2H5TIF0	Cytoskeletal regulatory protein binding protein, putative	RIR_2556000	808	27.448	41.5
A0A2H5TIF4	DNA ligase (EC 6.5.1.1)	RIR_2557300	729	27.073	28.7
A0A2H5TIF5	Fg-nucleoporin nsp1	RIR_2556600	862	23.3443	4.3
A0A2H5TIF8	Mitochondrial import inner membrane translocase subunit TIM54	GLOIN_2v1781496 RIR_2557200	320	25.8333	34.7
A0A2H5TIG0	Uncharacterized protein	GLOIN_2v1482974 RIR_2557400	135	27.2304	40.7
A0A2H5TIG1	Protoplast regeneration and killer toxin resistance protein	RIR_2547700	640	25.0225	13.9
A0A2H5TIG6	Ndt80 / phog like DNA-binding family protein	RIR_2557700	605	26.6205	16.4
A0A2H5TIH5	Ubiquitin-conjugating enzyme E2	RIR_2558400	147	27.1305	56.5
A0A2H5TIH7	Histone deacetylase (EC 3.5.1.98)	GLOIN_2v1664349 RIR_2558800	623	26.0071	23.3	Histone and histone modification
A0A2H5TII5	Mitochondrial 54S ribosomal protein YmL24/YmL14	RIR_2559300	185	23.215	9.7
A0A2H5TIJ5	Gamma interferon inducible lysosomal thiol reductase	RIR_2558000	212	27.7915	43.4
A0A2H5TIK1	Vesicle-associated membrane protein 4	RIR_2560500	130	24.3187	19.2
A0A2H5TIK5	Golgi to vacuole transport-related protein	RIR_2561800	391	23.4553	13.3
A0A2H5TIK9	Cell wall chitin catabolism-related protein	RIR_2561000	236	26.0587	39.4
A0A2H5TIM5	GAR domain-containing protein	RIR_2563100	3227	24.9187	5.5
A0A2H5TIP0	Ribosomal 60S subunit protein L24	RIR_2563400	179	29.8274	26.3
A0A2H5TIP2	COP9 signalosome complex subunit 6	RIR_2563200	339	28.8957	48.4
A0A2H5TIP8	Ran GDP/GTP exchange factor	GLOIN_2v1533887 RIR_2564300	644	28.1661	45.2
A0A2H5TIQ2	SNAP receptor, synaptobrevin	RIR_2564800	76	25.9353	40.8
A0A2H5TIS7	AMP deaminase (EC 3.5.4.6)	RIR_2566900	745	28.9892	50.5
A0A2H5TIT2	Peptidylprolyl isomerase (EC 5.2.1.8)	RIR_2556900	145	30.0037	50.3
A0A2H5TIV5	Phosphatidylserine decarboxylase (EC 4.1.1.65)	RIR_2558500	360	23.2419	8.1
A0A2H5TIV6	Elongator complex protein 2	GLOIN_2v1661235 RIR_2570200	881	24.6082	12.6
A0A2H5TIV7	Enhancer of mRNA-decapping protein 4	RIR_2567000	1451	28.6996	31.2
A0A2H5TJ53	Phosphatidylserine decarboxylase family protein	RIR_2574900	445	31.4084	62.5
A0A2H5TJ61	Alpha carbonic anhydrase (Carbonic anhydrase)	GLOIN_2v1671090 RIR_2576700	282	27.6785	44.7
A0A2H5TJ67	Dolichyl-diphosphooligosaccharide--protein glycosyltransferase subunit 1	RIR_2578000	435	28.4362	48.7
A0A2H5TJ70	Phosphatidylserine decarboxylase	RIR_2567500	135	26.1293	43
A0A2H5TJ74	3-hydroxyanthranilate 3,4-dioxygenase (EC 1.13.11.6) (3-hydroxyanthranilate oxygenase))	BNA1 RIR_2579200	158	26.2261	36.1
A0A2H5TJ76	Galactinol synthase	RIR_2578800	316	26.8251	46.8
A0A2H5TJ98	Vam7p	RIR_2580310	359	25.204	14.8
A0A2H5TJD4	Branchpoint-bridging protein	RIR_2580700	561	24.2217	7.5
A0A2H5TJA1	Serine/threonine-protein phosphatase (EC 3.1.3.16)	GLOIN_2v1464550 RIR_2580200	564	30.2202	59.2
A0A2H5TJB5	L-galactono-gamma-lactone oxidase (EC 1.1.3.37)	RIR_2579300	519	29.3834	53.9
A0A2H5TJC9	Uncharacterized protein	GLOIN_2v1627940 RIR_2583400	184	28.6453	65.2
A0A2H5TJE1	Serine/threonine-protein kinase	RIR_2583500	478	28.1221	28.9	Class C
A0A2H5TJE6	HTH myb-type domain-containing protein	RIR_2583600	218	26.9863	31.2
A0A2H5TJG0	Negative elongation factor B	RIR_2585900	624	23.5721	9.6
A0A2H5TJG4	Stearoyl-CoA desaturase	RIR_2584800	342	26.8457	32.7
A0A2H5TJG5	[Histone H3]-lysine(27) N-trimethyltransferase (EC 2.1.1.356)	RIR_2585500	912	25.5896	9.2	Histone and histone modification
A0A2H5TJH3	Ornithine aminotransferase (EC 2.6.1.13)	RIR_2585800	400	33.0396	84
A0A2H5TJH4	Ribosomal 40S subunit protein S22	RIR_2585700	168	30.5975	51.8
A0A2H5TJK8	Sh3 domain-binding glutamic acid-rich-like protein 3	GLOIN_2v1785006 RIR_2579000	99	27.8609	67.7
A0A2H5TJN2	Chs5-Arf1p-binding protein BUD7/BCH1	RIR_2592300	754	27.6921	26.4
A0A2H5TJP8	Partner of Y14 and mago	RIR_2592200	202	24.4571	20.3
A0A2H5TJP9	MICOS complex subunit MIC10	RIR_2591000	152	27.9324	32.2
A0A2H5TJQ0	ATP-binding cassette, subfamily D (ALD), peroxisomal long-chain fatty acid import protein	RIR_2592600	751	27.7423	30.6
A0A2H5TJR5	Autophagy-related protein 18	RIR_2583000	397	24.4901	26.7
A0A2H5TJR6	Trafficking protein particle complex subunit 9	RIR_2593400	1325	25.1272	7.9
A0A2H5TJT5	Oxysterol binding protein	RIR_2584700	399	29.0829	40.9
A0A2H5TK83	Kh domain containing protein	RIR_2596200	1331	26.1609	13.7
A0A2H5TJU8	Cytoplasm protein	RIR_2596400	437	25.9338	16.2
A0A2H5TJV1	Phenylalanyl-tRNA synthetase beta subunit (EC 6.1.1.20)	RIR_2585600	579	29.6283	52.3
A0A2H5TKB1	Mitochondrial pyruvate carrier	RIR_2607800	115	27.0479	45.2
A0A2H5TKH1	Glutathione S-transferase (Ure2p)	GLOIN_2v1670834 RIR_2614200	215	28.8155	38.6
A0A2H5TKQ0	Uncharacterized protein	RIR_2622000	2125	29.7102	31.1
A0A2H5TKS4	Neurofibromin 1	RIR_2622700	2645	24.3699	5.9
A0A2H5TKV1	Putative Glutathione transferase omega-1	RIR_2625600	1309	23.8848	5.1
A0A2H5TKV9	Ca2+-dependent lipid-binding protein	GLOIN_2v1814473 RIR_2626400	1146	30.8663	62.3
A0A2H5TKW5	Leukotriene A-4 hydrolase (Leukotriene A4 hydrolase)	GLOIN_2v1705450 RIR_2625400	612	28.95	38.4
A0A2H5TKX0	Deoxyribonuclease-1-like 2	RIR_2626600	545	27.276	33.8
A0A2H5TL14	Microsomal glutathione S-transferase 3	RIR_2629400	272	30.9989	48.5
A0A2H5TL23	Kelch-like protein 17	RIR_2619000 RIR_2619900	928	24.7655	10.7	Class C
A0A2H5TLC6	Eukaryotic translation initiation factor 4C	RIR_2640100	493	27.2318	10.3
A0A2H5TLD3	Cytochrome p450	RIR_2638700	535	26.4491	28
A0A2H5TLE4	Replication factor C subunit 1	RIR_2639900	970	26.1644	17.9
A0A2H5TLE7	Arylesterase / paraoxonase	RIR_2638900	366	26.4136	20.5
A0A2H5TLH9	Glutamyl-tRNA synthetase (EC 6.1.1.17)	RIR_2641600	797	29.1274	47.7
A0A2H5TLJ6	Uncharacterized protein	RIR_2643600	348	25.6949	34.5
A0A2H5TLJ7	Uncharacterized protein	RIR_2645900	997	22.8925	2.3
A0A2H5TLL5	Periplasmic binding protein	RIR_2645600	504	23.8107	10.3
A0A2H5TLS7	Major facilitator superfamily transporter	GLOIN_2v1677353 RIR_2652300	537	22.8441	5.2
A0A2H5TLT3	Peroxidase	RIR_2652800	678	27.6127	31.3
A0A2H5TLT4	Protein RER1	RIR_2640200	206	23.5538	27.2
A0A2H5TLV1	ATP phosphoribosyltransferase (EC 2.4.2.17)	RIR_2653000	276	26.429	30.4
A0A2H5TLV8	GMP synthase (glutamine-hydrolyzing) (EC 6.3.5.2)	RIR_2653700	476	27.877	51.1
A0A2H5TLW3	Kinase-like domain-containing protein (Phosphotransferase enzyme family domain protein)	GLOIN_2v1742901 RIR_2652900	368	26.5975	40.8
A0A2H5TLZ2	O-acetyl-ADP-ribose deacetylase 1	RIR_2645400	198	28.0372	52
A0A2H5TLZ3	Copper transporter	RIR_2655500	90	25.7273	30
A0A2H5TM01	Cytochrome p450 monooxygenase	RIR_2656800	789	23.0144	7.1
A0A2H5TM15	Curved DNA-binding protein cdb4, peptidase family (Putative peptidase M24)	GLOIN_2v1657707 RIR_2658600	404	31.256	66.1
A0A2H5TM18	Xanthine dehydrogenase/oxidase	RIR_2658100	724	24.7999	5.8
A0A2H5TM21	Gtp1/obg developmentally regulated GTP-binding protein	RIR_2658400	336	26.8998	40.2
A0A2H5TM33	Indigoidine synthase a family protein	RIR_2658800	381	24.0078	10.5
A0A2H5TM34	Ribosomal RNA methyltransferase Nop2	RIR_2659700	411	24.6523	11.4
A0A2H5TM35	Aldo-keto reductase	RIR_2658300	308	30.4273	71.1
A0A2H5TM46	HTH APSES-type domain-containing protein	RIR_2659500	297	26.9427	32
A0A2H5TM50	Pwwp domain protein	GLOIN_2v1658020 RIR_2661400	511	25.2583	12.1
A0A2H5TM52	Mitochondrial import receptor subunit TOM70	RIR_2661300	590	28.4473	46.9
A0A2H5TMA2	Ubiquitinyl hydrolase 1 (EC 3.4.19.12)	RIR_2664600	267	25.5704	34.5
A0A2H5TMA5	ADP-sugar pyrophosphatase / 8-oxo-dGDP phosphatase	RIR_2664500	197	26.3035	33.5
A0A2H5TMB0	50S ribosomal protein L22 (60S ribosomal protein L17)	GLOIN_2v1464795 RIR_2664300	196	30.1098	44.9
A0A2H5TML6	Pre-rRNA processing protein associated with U3 snRNP	RIR_2673500	506	23.1978	6.7
A0A2H5TML8	Uncharacterized protein	GLOIN_2v1673248 RIR_2673600	139	27.717	48.2
A0A2H5TMN2	Late endosome to vacuole transport-related protein, putative	RIR_2675200	482	25.4968	11
A0A2H5TMQ0	Uncharacterized protein	RIR_2675600	160	24.8194	45
A0A2H5TMX1	Aldo/keto reductase	RIR_2681300	274	26.0776	9.1
A0A2H5TMX3	Peptidase S8/S53 domain-containing protein (Peptidase s8)	GLOIN_2v1522529 RIR_2681500	426	28.6121	48.4
A0A2H5TNA1	Ribosomal protein s17	RIR_2692000	205	32.606	62
A0A2H5TNM0	Adf-like domain-containing protein	GLOIN_2v1849394 RIR_2698700	148	25.5203	29.1
A0A2H5TNP6	mRNA-capping enzyme subunit beta (EC 3.1.3.33) (Polynucleotide 5'-triphosphatase)	RIR_2700700	289	24.2485	16.6
A0A2H5TNP9	RNA lariat debranching enzyme	RIR_2701300	425	24.0951	15.8
A0A2H5TNQ0	Methylmalonyl CoA epimerase-like (Methylmalonyl-CoA/ethylmalonyl-CoA epimerase)	GLOIN_2v1490359 RIR_2700900	212	26.8916	40.6
A0A2H5TNQ3	Calcium-transporting ATPase (EC 7.2.2.10)	RIR_2701000	2379	25.3206	7.6
A0A2H5TNR1	Putative saccharopine dehydrogenase-like protein (Saccharopine dehydrogenase)	GLOIN_2v1490397 RIR_2701200	445	26.697	30.6
A0A2H5TNS6	NADH dehydrogenase 1 alpha subcomplex 6 (NADH dehydrogenase, alpha subcomplex, subunit 6)	GLOIN_2v1849426 RIR_2702600	117	28.765	68.4
A0A2H5TNU4	Cyclopropane-fatty-acyl-phospholipid synthase-like protein	GLOIN_2v1490561 RIR_2704300	360	23.7362	11.7
A0A2H5TNU5	Acetyl-CoA C-acyltransferase	RIR_2705000	957	32.0614	25.9
A0A2H5TNV4	Dephospho-coa kinase protein	RIR_2705200	188	23.0307	20.2
A0A2H5TNW1	Sterol metabolism-related protein	RIR_2705400	143	25.5949	44.8
A0A2H5TNW5	Clathrin heavy chain	RIR_2706400	2029	30.7334	44.2
A0A2H5TNW8	3-hydroxy-3-methylglutaryl coenzyme A synthase (HMG-CoA synthase) (EC 2.3.3.10)	RIR_2703900	471	28.2093	40.8
A0A2H5TNX3	Eukaryotic translation initiation factor 3 30 kDa subunit	RIR_2706200	348	27.5293	24.7
A0A2H5TNX7	Cytochrome b561	RIR_2707600	108	26.1558	15.7
A0A2H5TNX8	Nuclease s1 (S1/P1 nuclease)	GLOIN_2v1446383 RIR_2704900	296	31.0574	55.1
A0A2H5TNY7	Malate dehydrogenase (EC 1.1.1.37)	RIR_2708500	294	31.8179	60.2
A0A2H5TNZ2	UDP-glucose 4-epimerase (EC 5.1.3.2)	RIR_2708000	372	32.4251	68
A0A2H5TP08	NADH dehydrogenase [ubiquinone] flavoprotein 1, mitochondrial (EC 7.1.1.2)	GLOIN_2v1490877 RIR_2707500	486	29.3425	64.8
A0A2H5TP22	Protein arginine N-methyltransferase	RIR_2701100	610	24.5798	9.7
A0A2H5TP24	Probable ATP-dependent RNA helicase ddx43	RIR_2711900	379	25.5082	35.1
A0A2H5TP30	(2E,6E)-farnesyl diphosphate synthase	RIR_2711700	347	28.7981	44.4
A0A2H5TP32	PHD finger-like domain-containing protein 5A	RIR_2712300	124	23.2419	23.4
A0A2H5TP51	Short chain dehydrogenase/reductase family protein	RIR_2713800	261	23.5018	11.9
A0A2H5TP52	2-isopropylmalate synthase (EC 2.3.3.13)	RIR_2713700	862	30.4629	57.7
A0A2H5TP54	Calcium transporting P-type ATPase type	RIR_2713600	842	26.7366	24.3
U9SG66	Acyl-CoA dehydrogenase/oxidase (Short/branched chain acyl-coa dehydrogenase)	GLOIN_2v1491515 GLOINDRAFT_315392 RIR_2714100	422	30.9655	60.7
A0A2H5TP66	Pyruvate decarboxylase	RIR_2713500	569	25.4813	15.3
A0A2H5TP70	Ca2+:H+ antiporter	RIR_2706100	871	23.2088	1.7
A0A2H5TPA0	Mitochondrial carrier protein	GLOIN_2v1491035 RIR_2708900	460	24.211	8.3
A0A2H5TPC6	Uncharacterized protein	RIR_2717700	340	25.5592	16.8
A0A2H5TPE4	Uncharacterized protein	RIR_2722800	289	24.9859	25.3
A0A2H5TPF3	Uncharacterized protein	RIR_2722400	351	24.6831	4.6
A0A2H5TPM7	C2H2-type domain-containing protein	RIR_2729000	202	24.6602	21.3
A0A2H5TPM9	Alpha-aminoadipate reductase (EC 1.2.1.31) (EC 1.2.1.95) (L-aminoadipate-semialdehyde dehydrogenase)	RIR_2719200	1358	27.566	22
A0A2H5TPY4	Uncharacterized protein	RIR_2728900	552	27.0192	25.9
A0A2H5TQ04	Putative berberine family protein	RIR_2730100	745	24.5832	11.3
A0A2H5TQ12	Sdr family oxidoreductase	RIR_2738500	241	26.5245	15.8
A0A2H5TQ13	tRNA uridine 5-carboxymethylaminomethyl modification enzyme	RIR_2739900	2016	28.0195	14.1
A0A2H5TQ22	Serine/threonine protein phosphatase	RIR_2739500	535	23.6093	6.2
A0A2H5TQ35	Rho family GTPase Rho1	RIR_2740200	167	26.6388	34.7
A0A2H5TQ87	Serine peptidase, family s28	RIR_2745800	460	27.4018	26.1
A0A2H5TQA5	Nuclear pore complex protein nup214 isoform x2	RIR_2738300	742	24.5155	7.5
A0A2H5TQA7	Actin-binding protein Fragmin	GLOIN_2v1687986 RIR_2745900	379	30.7109	44.6
A0A2H5TQC1	Serine/threonine protein kinase	RIR_2748500	718	28.6238	41.9	Class C
A0A2H5TQC3	Alpha-glucosidase	RIR_2747700	1031	25.2089	6.6
A0A2H5TQE7	Anoctamin-7	GLOIN_2v1688267 RIR_2749010	854	26.3573	15.7
A0A2H5TQG1	Serine/threonine protein kinase	RIR_2748600	299	25.8123	36.1	Class C
A0A2H5TQP7	Transient receptor potential cation channel subfamily a member 1 homolog isoform x1	RIR_2758700	1433	25.3254	10.4
A0A2H5TQS1	Sacsin	RIR_2760000	2814	23.2227	2.7
A0A2H5TR40	Btb/poz domain-containing protein 19-like	RIR_2770700	485	22.7683	4.3	Class C
A0A2H5TR97	Cardiolipin synthase/ hydrolase fusion protein	RIR_2772800	441	23.1155	7
A0A2H5TRA5	SAM domain-containing protein	GLOIN_2v1587390 RIR_2774400	333	25.9976	29.7
A0A2H5TRA9	Selenoprotein w	RIR_2776100	293	26.9302	12.6
A0A2H5TRB1	Uncharacterized protein	GLOIN_2v1587441 RIR_2775900	777	24.8878	11.6
A0A2H5TRD6	Mynd domain protein	RIR_2778500	306	24.8443	23.5
A0A2H5TRE2	Mynd domain protein	RIR_2778200	414	31.2054	48.6
A0A2H5TRJ9	Mynd domain protein	RIR_2778600	375	26.7181	33.6
A0A2H5TRK3	Long-chain-fatty-acid-CoA ligase	GLOIN_2v1768036 RIR_2784000	676	27.9919	36.2
A0A2H5TRV7	Uncharacterized protein	RIR_2791000	166	26.9242	31.3
A0A2H5TSN2	Conserved fungal protein	GLOIN_2v1642062 RIR_2813900	124	31.0944	67.7
A0A2H5TSS0	Uncharacterized protein	RIR_2817800	350	28.8379	67.1
A0A2H5TSS5	Uncharacterized protein	RIR_2817700	881	33.5722	36.4
A0A2H5TST7	3-methylcrotonyl-CoA carboxylase alpha subunit (Methylcrotonoyl-CoA carboxylase 1)	GLOIN_2v1494675 RIR_2819400	724	25.6153	16.3
A0A2H5TSU7	Kelch repeat protein	GLOIN_2v1641931 RIR_2812900	431	26.5034	23.9	Class C
A0A2H5TSW3	Conserved protein Mug157	RIR_2814500	490	24.3548	12.4
A0A2H5TSW7	Glutathione synthetase (GSH-S) (EC 6.3.2.3)	GLOIN_2v620327 RIR_2817300	485	28.1885	58.4
A0A2H5TSY6	Uncharacterized protein	RIR_2823200	315	24.227	18.1
A0A2H5TSZ5	Metallo-dependent phosphatase-like protein (Tartrate-resistant acid phosphatase type 5)	GLOIN_2v1494770 RIR_2819700	350	24.7988	18.3
A0A2H5TT10	Fatty acid oxygenase (Heme peroxidase)	GLOIN_2v1544432 RIR_2823000	635	34.2543	72.8
A0A2H5TT22	Uncharacterized protein	RIR_2825400	354	24.841	13.3
A0A2H5TT35	Uncharacterized protein	RIR_2827300	345	27.0195	35.1
A0A2H5TT42	Uncharacterized protein	GLOIN_2v1544279 RIR_2824900	358	26.4709	28.2
A0A2H5TT44	Phospholipase (EC 3.1.4.4)	RIR_2823600	1188	29.2541	38.5
A0A2H5TT45	Mannosyltransferase	RIR_2820800	342	26.2586	24
A0A2H5TT55	MIR domain-containing protein	RIR_2828600	347	25.4645	30.8
A0A2H5TT95	Uncharacterized protein	RIR_2831500	401	27.7423	35.7
A0A2H5TTB3	Uncharacterized protein	GLOIN_2v1543797 RIR_2831300	352	27.4203	40.1
A0A2H5TTC3	Uncharacterized protein	RIR_2832100	366	23.2702	9.8
A0A2H5TTG7	Uncharacterized protein	GLOIN_2v1767369 RIR_2831600	362	25.9658	18
A0A2H5TTJ2	Hit-like hydrolase	RIR_2839200	154	29.5919	66.2
A0A2H5TTK3	Uncharacterized protein	GLOIN_2v1734790 RIR_2837700	313	25.8579	27.8
A0A2H5TTK5	NAD dependent epimerase/dehydratase (NAD-P-binding protein)	GLOIN_2v1680242 RIR_2839900	300	29.7234	56.7
A0A2H5TTM7	Calcium/calmodulin-dependent protein kinase kinase (Kinase-like domain-containing protein)	GLOIN_2v1680010 RIR_2841000	453	26.8994	29.8	Class C
A0A2H5TTP7	Chaperonin GroEL	RIR_2842700	583	33.3966	73.8
A0A2H5TTR1	Nmra-like family protein	GLOIN_2v1543605 RIR_2834300	313	32.71	69.3
A0A2H5TTR8	C2 domain protein	RIR_2844200	1708	27.3314	17.4
A0A2H5TTS3	Dihydroorotase (EC 3.5.2.3)	GLOIN_2v1679999 RIR_2841100	350	26.9234	25.4
A0A2H5TTT0	Proteasome regulatory particle lid subunit rpn13	RIR_2840400	352	28.345	30.4
A0A2H5TTV0	Alpha-actinin-actin cross linking	RIR_2841800	601	29.903	59.9
A0A2H5TTV4	ATP-dependent RNA helicase MSS116	GLOIN_2v1679675 RIR_2843600	630	27.7461	39.2
A0A2H5TTW6	Electron transfer flavoprotein-ubiquinone oxidoreductase (ETF-QO) (EC 1.5.5.1)	RIR_2844300	613	29.5054	51.2
A0A2H5TTX1	Phosphoribosylformylglycinamidine synthase	RIR_2849800	899	27.6445	30.4
A0A2H5TTZ4	Prohibitin	RIR_2850000	299	31.2622	62.9
A0A2H5TU11	DNA-directed RNA polymerase II subunit RPB7	GLOIN_2v1607822 RIR_2850500	179	23.9923	30.2
A0A2H5TU13	Autophagy-related protein 2	RIR_2851100	3342	26.0884	6.4
A0A2H5TU18	ATP-dependent RNA helicase DDX35	RIR_2842300	665	23.2121	5
A0A2H5TU39	GTP--RNA guanylyltransferase (EC 2.7.7.50) (mRNA guanylyltransferase)	RIR_2844000	388	24.0556	10.3
A0A2H5TU54	Coatomer subunit beta (Beta-coat protein)	GLOIN_2v1607807 RIR_2850400	952	29.4168	46.1
A0A2H5TU85	Uncharacterized protein	RIR_2857700	1390	25.0639	7.8
A0A2H5TUE2	JEMT01012221.1_cds_EXX76513.1_3519	GLOIN_2v1857668 RIR_2856810	63	28.1511	44.4
A0A2H5TUF0	Nucleus protein	RIR_2862100	926	24.5325	6.4
A0A2H5TUF1	Putative urea active transporter (Urea transporter)	GLOIN_2v1725431 RIR_2859000	654	24.673	5.4
A0A2H5TUF3	Epsilon-trimethyllysine 2-oxoglutarate dioxygenase (EC 1.14.11.8) (TML hydroxylase) (TML-alpha-ketoglutarate dioxygenase)	RIR_2863400	466	24.3826	13.9
A0A2H5TUL7	DnaJ homolog subfamily C member 2	RIR_2863100	734	26.7263	30.7
A0A2H5TUP9	Alpha/beta hydrolase protein	RIR_2869500	319	28.1697	46.4
A0A2H5TUM4	Mitochondrial morphology protein	RIR_2869700	459	25.138	18.1
A0A2H5TUM8	Putative Multiple inositol-polyphosphate phosphatase / 2,3-bisphosphoglycerate 3-phosphatase	RIR_2869600	418	27.4289	35.2
A0A2H5TUN3	Dihydrolipoyllysine-residue succinyltransferase (EC 2.3.1.61)	RIR_2870300	460	23.3429	5
A0A2H5TUQ1	Putative Multiple inositol-polyphosphate phosphatase / 2,3-bisphosphoglycerate 3-phosphatase	RIR_2869900	403	28.9796	47.1
A0A2H5TUQ3	S-phase kinase-associated protein 1	RIR_2872200	195	28.204	39.5
A0A2H5TUQ5	Ran protein binding protein	RIR_2872100	847	28.5551	24.4
A0A2H5TUQ6	Malonyl-CoA decarboxylase	RIR_2866900	554	24.0857	6.9
A0A2H5TUQ7	Isoleucyl-tRNA synthetase (EC 6.1.1.5)	GLOIN_2v1599210 RIR_2872000	1072	29.2764	38.1
A0A2H5TUS4	Mitogen-activated protein kinase kinase	RIR_2873300	805	29.4471	36.6
A0A2H5TUT0	Folylpolyglutamate synthase (EC 6.3.2.17) (Folylpoly-gamma-glutamate synthetase) (Tetrahydrofolylpolyglutamate synthase)	RIR_2870100	498	27.4297	33.3
A0A2H5TUT9	Serine/threonine-protein phosphatase 2A activator (EC 5.2.1.8) (Phosphotyrosyl phosphatase activator)	RIR_2874100	324	23.8284	14.5
A0A2H5TUY3	Histone H2A	GLOIN_2v1599873 RIR_2879600	135	30.3554	58.5	Histone and histone modification
A0A2H5TUY8	Tubulin beta chain	GLOIN_2v1599597 RIR_2877300	454	30.7689	57.5
A0A2H5TUY9	Gcn1-like translational activator	RIR_2874400	2696	29.4583	35.3
A0A2H5TVE0	Ras-related protein Rab-2A	RIR_2880500	222	26.4205	56.8
A0A2H5TUZ9	60S ribosomal protein L28	RIR_2878800	134	28.8989	41
A0A2H5TV07	60S ribosomal protein L30	RIR_2879300	135	29.5141	53.3
A0A2H5TV26	Histone H2B	RIR_2881310	171	32.2179	46.2	Histone and histone modification
A0A2H5TV36	MEMO1 family protein	RIR_2882100	329	27.1982	40.4
A0A2H5TV44	Pre-mRNA-processing factor 6	RIR_2878200	899	25.8116	21.7
A0A2H5TV54	ATP-binding cassette, subfamily F, member 2	RIR_2885200	591	28.1373	52.1
A0A2H5TV55	Protein MYSM1	RIR_2884600	531	23.5328	9.8
A0A2H5TV64	Ribosomal 60S subunit protein L2	RIR_2885900	149	29.2073	24.2
A0A2H5TV69	3-methylcrotonyl-CoA carboxylase beta subunit	RIR_2884800	603	25.3033	18.4
A0A2H5TVA7	Expressed protein	GLOIN_2v1487012 RIR_2885600	254	23.6553	13.8
A0A2H5TVB9	WD40 repeat-containing protein SMU1	GLOIN_2v1713169 RIR_2884900	519	24.8353	9.2
A0A2H5TVC1	Sulfurtransferase	RIR_2878700	190	25.6358	33.7
A0A2H5TVD9	Leucine-rich repeat-containing protein	RIR_2886500	669	23.9609	6.6
A0A2H5TVJ2	Putative heat shock protein (Stress-induced-phosphoprotein 1)	GLOIN_2v1713073 RIR_2884400	561	30.1848	63.6
A0A2H5TVK1	Mir domain containing protein	RIR_2897600	383	23.8391	9.1
A0A2H5TVK5	Stromal cell-derived factor 2	RIR_2897500	376	26.734	30.3
A0A2H5TVP5	Protein o-mannosyl-transferase 2-like	GLOIN_2v1543209 RIR_2900700	354	23.3534	10.2
A0A2H5TVS4	Retinol dehydrogenase 12	GLOIN_2v1543344 RIR_2902100	303	28.553	47.9
A0A2H5TVT3	Nf-x1 finger and helicase domain protein	RIR_2902300	2224	25.6118	8.4
A0A2H5TW64	Uncharacterized protein	RIR_2915000	352	25.2357	27
A0A2H5TWA7	Uncharacterized protein	RIR_2917300	583	24.9015	14.9
A0A2H5TWE2	Glucose-methanol-choline oxidoreductase (Putative Choline dehydrogenase)	GLOIN_2v1667824 RIR_2920900	617	27.2668	20.4
A0A2H5TWF8	Crinkler family protein	RIR_2921600	872	25.0391	12.7	Putative effector
A0A2H5TWF9	Pap2 phosphatidic acid phosphatase	RIR_2921300	280	25.0324	12.5
A0A2H5TWG7	Patatin	RIR_2912100	1343	29.0173	40.2
A0A2H5TWP7	Pap2 phosphatidic acid phosphatase	RIR_2918100	271	26.4526	6.6
A0A2H5TWT0	Alpha/Beta hydrolase protein (Lipase/esterase family protein)	GLOIN_2v1686417 RIR_2931800	465	27.3599	22.6
A0A2H5TXF3	Btb/poz domain-containing protein 9	GLOIN_2v1492801 RIR_2950600	485	27.0332	28.9	Class C
A0A2H5TXG0	Serine/threonine protein kinase	RIR_2948900	615	26.9846	24.2	Class C
A0A2H5TXN5	Extracellular dihydrogeodin oxidase/laccase	RIR_2958200	640	23.514	10
A0A2H5TXT4	Universal stress protein a-like protein	GLOIN_2v1648082 RIR_2959200	162	25.862	51.9
A0A2H5TXV1	DNA-directed DNA polymerase	RIR_2964300	1197	24.1058	6.1
A0A2H5TYB4	ATP-binding cassette transporter atm1	RIR_2966500	726	24.1947	9.6
A0A2H5TXZ2	Mitochondrial carrier protein leu5	RIR_2967100	240	23.1264	12.5
A0A2H5TY10	Splicing factor u2af-associated protein 2	RIR_2968800	377	23.9613	19.1
A0A2H5TY15	Lipase	RIR_2969000	276	24.357	20.3
A0A2H5TY34	Queuosine salvage protein	GLOIN_2v1574998 RIR_2970500	360	25.6795	24.4
A0A2H5TY39	NADH-ubiquinone oxidoreductase subunit	RIR_2971110	211	23.7137	19.4
A0A2H5TY41	Cytosine-mismatch binding protein 1	RIR_2970600	1208	24.3591	3.4
A0A2H5TY48	Uncharacterized protein	RIR_2967800	97	23.9049	22.7
A0A2H5TY51	Actin lateral binding protein	RIR_2969400	122	25.0317	33.6
A0A2H5TYB5	Cbs and pb1 domain-containing protein	RIR_2973200	611	24.8105	12.8
A0A2H5TY74	Actin-related protein 2/3 complex subunit	RIR_2973300	367	28.9426	57.5
A0A2H5TY76	Aconitate hydratase, mitochondrial (Aconitase) (EC 4.2.1.-)	RIR_2973500	786	32.9986	60.6
A0A2H5TY79	Small RNA-binding pol III transcript stabilizing-like protein	GLOIN_2v1575591 RIR_2974000	564	26.3415	22
A0A2H5TY82	Sterol 3-beta-glucosyltransferase (EC 2.4.1.173) (Autophagy-related protein 26)	RIR_2971600	1072	27.6646	25.2
A0A2H5TY88	Solute carrier family 25 (Mitochondrial phosphate transporter), member 23/24/25/41	RIR_2971100	377	23.3235	14.9
A0A2H5TY89	Cyclin-dependent serine/threonine-protein kinase pho85 (Kinase-like domain-containing protein)	GLOIN_2v1453641 RIR_2974800	411	24.8014	12.2	Class C
A0A2H5TY90	Cleavage stimulation factor subunit 1	RIR_2975400	428	23.9551	12.4
A0A2H5TY94	Small glutamine-rich tetratricopeptide repeat-containing protein alpha	GLOIN_2v1575576 RIR_2973800	359	27.7598	35.7
A0A2H5TYB1	Proteasome subunit beta (EC 3.4.25.1)	RIR_2975600	261	29.0909	59.4
A0A2H5TYC0	U4/U6 small nuclear ribonucleoprotein PRP4	RIR_2977400	538	23.8235	15.4
A0A2H5TYC5	Proteasome subunit beta (EC 3.4.25.1)	RIR_2974500	225	29.6523	41.3
A0A2H5TYD2	Putative ATP-binding cassette transporter	RIR_2968300	1532	23.6495	1.6
A0A2H5TYD3	Lim-like protein linking chromatin modification to rnai, stc1	RIR_2977600	140	27.2552	42.1	RNAi-related
A0A2H5TYD4	C2h2 transcription factor	RIR_2975500	551	24.3341	7.3
A0A2H5TYD6	ATP-dependent RNA helicase DDX18/HAS1	RIR_2974700	660	23.2033	7
A0A2H5TYH0	UBX domain-containing protein 1	RIR_2977200	360	28	53.9
A0A2H5TYJ9	Calmodulin-dependent protein kinase	RIR_2983400	661	26.8738	24.1	Class C
A0A2H5TYM6	Calmodulin-dependent protein kinase (Kinase-like domain-containing protein)	GLOIN_2v1781437 RIR_2983300	646	26.5053	12.7	Class C
A0A2H5TZG2	Vacuolar protein sorting-associated protein 35	RIR_3009000	971	27.654	17.5
A0A2H5TZN5	Kinesin family member 4/21/27	RIR_3015000	2500	24.3501	0.9
A0A2H5TZP7	Glutamate--cysteine ligase (EC 6.3.2.2) (Gamma-ECS) (Gamma-glutamylcysteine synthetase)	RIR_3015600	672	27.8153	33.2
A0A2H5TZQ0	ATPase_2 domain-containing protein	RIR_3015500	574	25.5408	19.5
A0A2H5TZS8	Heat shock protein hsp20/hsp26	RIR_3018800	349	27.2997	17.8
A0A2H5TZU4	Dcd (Development and cell death) domain protein	GLOIN_2v1498663 RIR_3009800	282	24.5812	16
A0A2H5TZV2	Sphingolipid long chain base-responsive protein pil1	GLOIN_2v1625825 RIR_3017800	629	28.2989	50.4
A0A2H5U093	60S ribosomal protein L34	RIR_3033600	112	28.7867	28.6
A0A2H5U0A8	Phospholipase A-2-activating protein	GLOIN_2v1703674 RIR_3034700	775	29.4697	47.6
A0A2H5U0B1	5'-3' exoribonuclease 2	RIR_3034900	589	24.8172	12.9
A0A2H5U0C3	DNA damage-responsive RNA polymerase-degradation factor def1	RIR_3036400	1035	27.2757	18.1
A0A2H5U0D1	Mediator of RNA polymerase II transcription subunit 20 (Mediator complex subunit 20)	MED20 RIR_3036600	177	23.2639	11.3
A0A2H5U0F1	5'-3' exoribonuclease 2	RIR_3035000	336	23.388	28
A0A2H5U0M1	Beta-N-acetylhexosaminidase (EC 3.2.1.52)	RIR_3045100	873	29.1307	31.2
A0A2H5U0N3	Pre-mRNA-processing factor 19 (EC 2.3.2.27)	GLOIN_2v1725045 RIR_3045000	506	28.5437	43.7
A0A2H5U0P5	40S ribosomal protein S1	RIR_3036500	102	30.6903	41.2
A0A2H5U0R9	Phosphoacetylglucosamine mutase (PAGM)	GLOIN_2v1656795 RIR_3049600	550	30.6426	60.4
A0A2H5U0U0	Gdsl lipase/acylhydrolase family protein	RIR_3050100	261	26.2124	24.9
A0A2H5U140	Alcohol dehydrogenase	RIR_3053900	336	29.096	51.5
A0A2H5U154	Staphylococcal nuclease domain-containing protein 1	GLOIN_2v1776379 RIR_3059800	879	30.7829	68.7
A0A2H5U173	Alanine acetyltransferase (Glutathione-dependent formaldehyde-activating, GFA)	GLOIN_2v1621621 RIR_3062100	166	28.3938	57.8
A0A2H5U178	Copper radical oxidase (Glyoxal oxidase)	GLOIN_2v1621243 RIR_3057400	566	28.6692	43.5
A0A2H5U179	Transcription regulator RTG2	RIR_3062200	638	29.6975	53.1
A0A2H5U1B4	Upf0187-domain-containing protein	RIR_3065700	334	32.2378	40.1
A0A2H5U1C7	Negative regulation of gluconeogenesis-related protein	RIR_3065400	682	23.7695	7.8
A0A2H5U1D5	Serine/threonine-protein phosphatase 2A 56 kDa regulatory subunit	RIR_3066400	646	27.4485	28.5
A0A2H5U1E5	Rab family GTPase YPT1	RIR_3067800	237	29.7693	45.1
A0A2H5U1E6	CCR4-NOT transcription complex subunit 3	GLOIN_2v1633847 RIR_3067900	673	23.885	4.2
A0A2H5U1E9	WW domain-containing protein	GLOIN_2v1480602 RIR_3067600	252	23.2576	23.4
A0A2H5U1G2	Flagellar calcium-binding protein-like	GLOIN_2v1776352 RIR_3056900	753	31.9559	56.6
A0A2H5U1G3	Protein-nucleus import-related protein	RIR_3068400	733	29.0493	49.5
A0A2H5U1H2	Fad binding domain protein	RIR_3057900	458	25.4618	12.9
A0A2H5U1I9	Ribose-phosphate diphosphokinase (EC 2.7.6.1)	RIR_3071000	324	27.6277	46
A0A2H5U1J4	Non-specific serine/threonine protein kinase (EC 2.7.11.1)	RIR_3066600	3877	22.9937	2.2	Class C
A0A2H5U1K7	Autophagy-related protein	RIR_3068200	141	27.5762	34.8
A0A2H5U1L5	Protein transport protein SEC31 (Protein transport protein sec31)	GLOIN_2v1633885 RIR_3068300	1409	29.5284	33.9
A0A2H5U1M4	Guanyl-nucleotide exchange factor	RIR_3069700	497	23.5601	8.2
A0A2H5U1N2	Nipsnap family protein	RIR_3062900	315	26.5077	31.4
A0A2H5U1N7	Zinc finger protein	RIR_3075300	129	24.3474	25.6
A0A2H5U1P0	Structural maintenance of chromosomes protein	RIR_3075200	1195	24.5968	7.2
A0A2H5U1P2	Bola domain protein	RIR_3063800	98	24.9257	34.7
A0A2H5U1P6	Rrm domain protein	RIR_3076000	416	22.7952	7
A0A2H5U1Q4	Hsp90 chaperone protein kinase-targeting subunit	RIR_3075900	516	28.1048	33.7
A0A2H5U1R1	3-hydroxyisobutyrate dehydrogenase (HIBADH) (EC 1.1.1.31)	RIR_3077300	400	27.8665	35
A0A2H5U1R3	Tubulin-folding cofactor C	RIR_3076700	604	26.7664	23.8
A0A2H5U1R5	Coronin	RIR_3076800	454	29.4092	63.9
A0A2H5U1S8	Pyruvate carboxylase (EC 6.4.1.1)	RIR_3078700	1127	31.7531	55.3
A0A2H5U1V5	Spermidine synthase	GLOIN_2v1565514 RIR_3078800	295	28.7907	47.1
A0A2H5U1V6	Bzip transcription factor	GLOIN_2v1565375 RIR_3081000	276	23.6944	10.5
A0A2H5U1V8	Bar adaptor protein	RIR_3080800	557	24.5586	16.5
A0A2H5U1W4	Glucosidase 2 subunit beta	RIR_3080700	494	25.2978	19
A0A2H5U1W8	Copii-coated vesicle component erv46	RIR_3081900	404	24.2248	10.6
A0A2H5U1W9	Isochorismatase family protein	RIR_3077400	371	24.7405	11.9
A0A2H5U1X1	Ste20-like serine/threonine protein kinase	RIR_3070100	608	23.862	11.8	Class C
A0A2H5U1X6	Eukaryotic translation initiation factor 4E binding protein (Eukaryotic translation initiation factor 4e-binding protein 1-like)	GLOIN_2v1565249 RIR_3082500	146	23.0269	16.4
A0A2H5U1Z3	Proteasome activator subunit 4	RIR_3083000	1766	28.4006	24.5
A0A2H5U210	Gdsl family lipase	RIR_3085000	310	27.9825	41.3
A0A2H5U214	Putative vacuolar protein-sorting protein bro1 (Vacuolar protein-sorting protein bro1)	GLOIN_2v1475370 RIR_3085200	1268	27.3323	26
A0A2H5U218	Meiotic chromosome segregation protein meu6	RIR_3085700	1005	31.4343	53.7	Sex and meiosis
A0A2H5U223	Homoaconitase, mitochondrial (EC 4.2.1.36) (Homoaconitate hydratase)	RIR_3086200	672	28.7255	41.5
A0A2H5U224	NADH-cytochrome b5 reductase (EC 1.6.2.2)	GLOIN_2v1564908 RIR_3085500	283	30.9939	84.8
A0A2H5U249	Dynein light chain Tctex-type 1	RIR_3088000	141	24.9893	25.5
A0A2H5U252	ATP-dependent DNA helicase II subunit 2 (EC 3.6.4.12) (ATP-dependent DNA helicase II subunit Ku80)	RIR_3083700	743	27.0447	24.1
U9UQE9	ATP-dependent RNA helicase DBP5 (Cytoplasmic ATP-dependent RNA helicase Dbp5)	GLOIN_2v1564762 GLOINDRAFT_344907 RIR_3087800	451	28.6961	40.8
A0A2H5U265	GCS light chain (Gamma-ECS regulatory subunit)	RIR_3088600	343	23.7507	15.7
A0A2H5U274	Uncharacterized protein	GLOIN_2v1564725 RIR_3088200	344	23.1052	11.9
A0A2H5U282	Succinate dehydrogenase [ubiquinone] flavoprotein subunit, mitochondrial (EC 1.3.5.1)	GLOIN_2v1632017 RIR_3090500	645	31.6124	60.9
A0A2H5U291	Zinc knuckle nucleic acid binding protein	RIR_3080200	184	25.8639	38.6
A0A2H5U2A8	Rho GTPase activator	RIR_3093500	576	23.5618	8
A0A2H5U2B2	Histone acetyltransferase type B subunit 2	GLOIN_2v1632283 RIR_3093200	438	26.7358	23.3	Histone and histone modification
A0A2H5U2C8	Aldehyde dehydrogenase	GLOIN_2v1854539 RIR_3082400	506	26.2664	30.6
A0A2H5U2H4	Nudix family hydrolase	RIR_3093900	261	27.8834	41
A0A2H5U2I8	Pre-mRNA-splicing factor SYF2 (Pre-mRNA-splicing factor syf2)	RIR_3100100	802	22.9973	4.5
A0A2H5U2J4	Dynactin Arp1 p62 subunit RO2	RIR_3100400	423	24.9947	17.5
A0A2H5U2J7	Solute carrier family 25 (Peroxisomal adenine nucleotide transporter), member 17	RIR_3100900	319	24.7718	13.5
A0A2H5U2J9	Uncharacterized protein	RIR_3095700	352	25.5499	11.9
A0A2H5U2N2	Nrd1 complex RNA-binding subunit	GLOIN_2v1620702 RIR_3100700	858	23.3071	2.8
A0A2H5U2S9	NAD(P)H:quinone oxidoreductase, type IV	RIR_3102300	254	28.7098	33.1
A0A2H5U2X8	Exosome complex exonuclease DIS3/RRP44 (Exosome complex exonuclease RRP44-like protein)	GLOIN_2v1564402 RIR_3111700	1002	23.5596	8.7
A0A2H5U2Y3	Iron-sulfur cluster biogenesis iba57-like protein	RIR_3110600	372	25.8399	21.5
A0A2H5U2Z8	Putative translation initiation factor eIF-2B subunit delta (Translation initiation factor eIF-2B subunit delta)	GLOIN_2v1564141 RIR_3112900	379	26.7556	33.2
A0A2H5U300	NADH dehydrogenase Fe-s protein 5	RIR_3113400	196	24.919	9.2
A0A2H5U302	40S ribosomal protein S15	RIR_3112400	129	30.0256	50.4
A0A2H5U304	Phosphatidylserine synthase 2	RIR_3112200	372	25.9159	25.8
A0A2H5U305	Threonine synthase (EC 4.2.3.1)	GLOIN_2v1741624 RIR_3114100	519	27.8385	37
A0A2H5U319	26S proteasome regulatory subunit rpn6	RIR_3115000	2271	30.2516	19.6
A0A2H5U321	Cell cycle arrest protein BUB3	RIR_3114700	150	23.7581	43.3
A0A2H5U330	Leucyl-tRNA synthetase (EC 6.1.1.4)	RIR_3116000	1150	24.3889	6.6
A0A2H5U343	Mitogen-activated protein kinase (EC 2.7.11.24)	RIR_3115900	421	29.1461	39.7	Class C
A0A2H5U348	Gpi-anchored cell surface glycoprotein	RIR_3111900	364	28.0188	40.9
A0A2H5U351	Ubiquitin carboxyl-terminal hydrolase (EC 3.4.19.12)	RIR_3114300	978	24.4469	6.1
A0A2H5U361	Dihydroorotate dehydrogenase (quinone), mitochondrial (DHOdehase) (EC 1.3.5.2)	GLOIN_2v1563186 RIR_3118700	381	26.3096	24.9
A0A2H5U364	Alpha-soluble NSF attachment protein	RIR_3117600	393	23.0378	9.9
A0A2H5U3P6	Glyoxal oxidase	RIR_3133700	558	29.12	37.1
A0A2H5U425	Protein HIR	GLOIN_2v1704924 RIR_3140500	995	26.2048	15.5
A0A2H5U451	Uncharacterized protein	GLOIN_2v1681614 RIR_3147300	466	32.2456	68.7
A0A2H5U471	Camk/camkl protein kinase	RIR_3147500	1110	23.1481	3.9
A0A2H5U473	Aldo/keto reductase	RIR_3149900	321	28.4044	29
A0A2H5U492	Proline dehydrogenase (EC 1.5.5.2)	RIR_3146000	579	24.5389	10.7
A0A2H5U4D1	Aldo/keto reductase	GLOIN_2v1681302 RIR_3149300	324	26.8887	21.9
A0A2H5U4D2	Aldo/keto reductase	GLOIN_2v1681277 RIR_3149400	329	30.3731	39.8
A0A2H5U4D3	Uncharacterized protein	RIR_3154500	588	26.284	29.6
A0A2H5U4L9	Serine-threonine protein kinase	RIR_3160900	536	24.1431	9.5	Class C
A0A2H5U4N9	Serine/threonine protein phosphatase 5 phosphatase, putative	RIR_3162700	754	27.3701	42.2
A0A2H5U505	Serine/threonine protein phosphatase 5 phosphatase, putative	RIR_3170800	770	25.3161	16.9
A0A2H5U597	Thioredoxin reductase (EC 1.8.1.9)	RIR_3179800	346	29.6861	58.1
A0A2H5U5C0	Inositol hexakisphosphate and diphosphoinositol-pentakisphosphate kinase	GLOIN_2v1696429 RIR_3180300	898	24.5092	9
A0A2H5U5Q5	Chromatin organization modifier domain-containing protein	RIR_3179700	295	27.9947	30.8
A0A2H5U5H0	2-hydroxychromene-2-carboxylate isomerase	RIR_3186500	495	26.4502	24.6
A0A2H5U5H3	Prolyl-tRNA synthetase (EC 6.1.1.15)	RIR_3180200	484	29.9981	60.1
A0A2H5U5K4	Sel1 repeat domain-containing protein	RIR_3187400	1586	24.5177	7.1	Class C
A0A2H5U5Q8	Tubulin beta chain	RIR_3187600	447	30.1411	27.5
A0A2H5U5S0	Aconitate hydratase, mitochondrial (Aconitase) (EC 4.2.1.-)	GLOIN_2v1639549 RIR_3194400	794	27.7801	28.3
A0A2H5U5T9	Putative cytochrome p450 monooxygenase/phenylacetate hydroxylase	RIR_3195400	532	25.3092	24.6
A0A2H5U5X2	Uncharacterized protein	GLOIN_2v1639026 RIR_3199200	187	25.0476	17.6
A0A2H5U5X8	Tubulin specific chaperone cofactor e	GLOIN_2v1536599 RIR_3187100	554	24.7707	17.1
A0A2H5U5Y2	Copper-transporting ATPase	GLOIN_2v1639093 RIR_3198800	1121	22.9511	4.8
A0A2H5U603	Uncharacterized protein	GLOIN_2v1639405 RIR_3195500	1006	27.7687	13.8
A0A2H5U650	Uncharacterized protein	RIR_3205700	648	24.0707	11
A0A2H5U664	Uncharacterized protein	RIR_3206800	77	25.2761	35.1
A0A2H5U673	Putative ferric-chelate reductase 1	RIR_3207900	313	28.6031	22.7
A0A2H5U694	[Acyl-carrier-protein] S-malonyltransferase (EC 2.3.1.39)	GLOIN_2v1590328 RIR_3208800	364	26.9454	41.8
A0A2H5U6B6	Mot1 helicase-like protein	RIR_3206000	1887	24.3629	6.4
A0A2H5U6G0	Serine/threonine protein kinase	RIR_3214800	454	23.8456	9.9	Class C
A0A2H5U6I4	Uncharacterized protein	RIR_3205500	460	25.5663	31.3
A0A2H5U6I6	Uncharacterized protein	RIR_3211100	572	24.8229	15.4
A0A2H5U6J4	Uncharacterized protein	RIR_3211900	136	29.4273	65.4
A0A2H5U6S7	Uncharacterized protein	RIR_3222300	130	22.8714	26.9
A0A2H5U7H0	3'-to-5' phosphorolytic exoribonuclease	RIR_3240600	243	23.8938	13.6
A0A2H5U7J4	RING-type E3 ubiquitin transferase (EC 2.3.2.27)	RIR_3242300	909	23.0105	4.7
A0A2H5U7K3	NAD binding rossmann fold oxidoreductase	RIR_3242000	379	26.7096	36.7
A0A2H5U7L4	Peroxisomal dehydratase	RIR_3242800	308	29.076	64.3
A0A2H5U7U0	NADH-cytochrome b5 reductase (EC 1.6.2.2)	GLOIN_2v1562102 RIR_3243800	298	25.9254	39.6
A0A2H5U7V6	Eukaryotic translation initiation factor 5	RIR_3251900	348	27.0053	37.6
A0A2H5U7X3	Uncharacterized protein	RIR_3253700	844	27.491	20
A0A2H5U7Y0	Nuclear cohesin complex protein	RIR_3254700	691	23.4963	5.5
A0A2H5U7Z1	Cytoskeleton assembly control protein SLA2	RIR_3248300	1056	28.912	42.9
A0A2H5U7Z2	Uncharacterized protein	RIR_3253500	293	26.3047	24.9
A0A2H5U7Z7	Oxidoreductase, short-chain dehydrogenase/reductase family	RIR_3254900	334	28.4212	49.7
A0A2H5U7Z8	Ubiquinol-cytochrome c reductase subunit 10	GLOIN_2v1771393 RIR_3254400	69	26.4295	66.7
A0A2H5U834	DNA-dependent protein kinase catalytic subunit (EC 2.7.11.1)	RIR_3251500	4058	27.1068	10.6
A0A2H5U847	Uncharacterized protein	RIR_3252300	369	23.9034	10
A0A2H5U859	Eukaryotic translation initiation factor 3 subunit E (eIF3e)	INT6 GLOIN_2v1694748 RIR_3261100	433	29.5265	61.2
A0A2H5U867	Cytokinesis protein cyk3	RIR_3254000	565	29.51	61.9
A0A2H5U884	Ribosomal subunit biogenesis RNA-binding protein (Ribosome biogenesis protein BRX1)	GLOIN_2v1464653 RIR_3261700	289	22.8982	8.7
A0A2H5U894	Dynactin subunit 6	RIR_3263700	229	23.8138	15.3
A0A2H5U8A1	p23 chaperone protein wos2	RIR_3264600	230	30.4712	36.5
A0A2H5U8A3	Uncharacterized protein	RIR_3251800	147	26.7724	24.5
A0A2H5U8A9	Glucosamine 6-phosphate N-acetyltransferase (EC 2.3.1.4)	RIR_3264800	157	24.1338	33.1
A0A2H5U8B3	ADP-ribosylation factor, arf family	RIR_3265400	141	27.9571	26.2
A0A2H5U8Q1	DNA polymerase delta regulatory subunit B	RIR_3265300	809	24.4863	7.9
A0A2H5U8C2	Coatomer subunit beta'	GLOIN_2v1647827 RIR_3266200	940	28.9831	42.7
A0A2H5U8C4	DNA-directed RNA polymerase II subunit RPB3	RIR_3266100	301	23.8229	14.6
A0A2H5U8C7	Lysine--tRNA ligase (EC 6.1.1.6) (Lysyl-tRNA synthetase)	RIR_3264200	579	29.5782	59.8
A0A2H5U8C8	Carbonic anhydrase (EC 4.2.1.1) (Carbonate dehydratase)	RIR_3267800	220	31.9467	77.3
A0A2H5U8C9	COP9 signalosome complex subunit 3	RIR_3266400	459	28.2995	40.3
A0A2H5U8D0	Tap42-like family protein	RIR_3266300	314	24.8039	31.8
A0A2H5U8D9	Ribosomal 60S subunit protein L31	RIR_3267300	142	30.2257	42.3
A0A2H5U8E3	Pre-mRNA-processing factor 17	RIR_3260500	418	23.6975	7.9
A0A2H5U8E8	Spore wall assembly protein	RIR_3269600	251	23.2377	8.4
A0A2H5U8G3	DNA helicase (EC 3.6.4.12)	RIR_3268600	1037	24.7711	13.8
A0A2H5U8G4	D-3-phosphoglycerate dehydrogenase	RIR_3269800	293	30.0814	59
A0A2H5U8U7	NADH dehydrogenase ubiquinone	RIR_3269700	297	28.3789	49.8
A0A2H5U8L6	Glucose-6-phosphate dehydrogenase (NADP(+)) (EC 1.1.1.49)	RIR_3272600	462	32.6043	81.4
A0A2H5U8M1	Replication factor C subunit 2/4	RIR_3273500	324	26.3201	30.2
A0A2H5U8M9	Seryl-tRNA synthetase (EC 6.1.1.11) (Seryl-tRNA(Ser/Sec) synthetase)	RIR_3263600	508	28.4176	50.4
A0A2H5U8P3	Nuclear pore complex protein Nup188	RIR_3275700	1449	23.6165	6.2
A0A2H5U8S8	Mitochondrial protein nca2	RIR_3270200	683	25.0415	14.1
A0A2H5U8Q9	Splicing factor 3A subunit 3	RIR_3268500	484	25.5807	24.2
A0A2H5U8R8	Uncharacterized protein	RIR_3270800	377	25.2888	23.6
A0A2H5U8R9	Protein flug	RIR_3269400	843	31.7836	56.6
A0A2H5U953	Sec1-like syntaxin-binding protein	RIR_3281800	713	27.388	28.6
A0A2H5U8W1	Actin cytoskeleton organization protein app1	RIR_3272500	758	26.595	9.1
A0A2H5U8Y5	Protein TIF31	RIR_3275800	1147	27.2257	22.5
A0A2H5U8Z8	3-hydroxyisobutyrate dehydrogenase	RIR_3285000	295	32.6937	84.4
A0A2H5U9B5	Rab family GTPase	RIR_3286600	790	28.7903	46.3
A0A2H5U939	Nitric oxide synthase-interacting protein	GLOIN_2v1723651 RIR_3280900	352	23.1392	8.8
A0A2H5U983	Elongation factor Tu	RIR_3281400	479	29.2474	50.7
A0A2H5U992	Oxysterol-binding protein	RIR_3285200	1113	25.5865	14.6
A0A2H5U9C8	RNA-binding protein Musashi	RIR_3287300	477	25.6138	27
A0A2H5U9D0	Armadillo-type protein (Importin-4)	GLOIN_2v1654538 RIR_3297100	1053	26.8529	23.3
A0A2H5U9D7	Derlin	RIR_3296500	253	24.166	8.7
A0A2H5U9E1	Disulfide oxidoreductase	RIR_3286700	491	24.1653	11.4
A0A2H5U9E4	Snrna-activating protein complex subunit 4	RIR_3295200	492	24.2959	12
A0A2H5U9F3	Phospholipase D (EC 3.1.4.4)	GLOIN_2v1654193 RIR_3299400	722	32.6528	69.1
A0A2H5U9F6	Peptidyl-prolyl cis-trans isomerase (PPIase) (EC 5.2.1.8)	GLOIN_2v1654121 RIR_3300300	158	27.189	48.7
A0A2H5U9K0	Hsp70 nucleotide exchange factor	RIR_3304400	293	27.0291	54.9
A0A2H5U9N3	Regulatory associated protein of mTOR	RIR_3306700	1172	23.2067	7
A0A2H5U9P2	Cerevisin	RIR_3307500	609	30.1943	19.9
A0A2H5U9P6	Alpha 1,2-mannosyltransferase	RIR_3296800	376	24.6776	18.1
A0A2H5U9S6	Adenosine kinase (EC 2.7.1.20)	RIR_3306600	336	30.7838	72.9
A0A2H5U9S7	Prefoldin subunit 4	GLOIN_2v1654608 RIR_3296300	130	25.2328	36.2
A0A2H5U9V9	Putative YML079W	RIR_3313700	209	28.1838	56.5
A0A2H5U9Y3	Sh3 domain-containing kinase-binding protein 1	RIR_3304600	776	27.1594	24.1
A0A2H5U9Z3	Uncharacterized protein	RIR_3317100	219	28.9618	36.5
A0A2H5UA07	Putative Splicing factor U2AF 65 kDa subunit	RIR_3318700	688	25.2264	9.3
A0A2H5UA17	Ribosomal 60S subunit protein L14	RIR_3304700	146	31.7003	54.8
A0A2H5UA25	Ornithine transcarbamylase	GLOIN_2v1859738 RIR_3319900	389	27.8129	47.3
A0A2H5UA30	Ran GTPase-activating protein 1	RIR_3318800	488	27.8362	37.5
A0A2H5UA33	Non-specific serine/threonine protein kinase (EC 2.7.11.1)	RIR_3320600	699	26.2692	17.6	Class C
A0A2H5UA39	Septin 7	RIR_3319800	421	27.4596	44.2
A0A2H5UA45	Exported protein, putative	GLOIN_2v1503729 RIR_3307300	201	24.7805	36.8
A0A2H5UA65	Non-specific serine/threonine protein kinase (EC 2.7.11.1)	RIR_3323200	1016	25.4631	10.6	Class C
A0A2H5UA74	Non-specific serine/threonine protein kinase (EC 2.7.11.1)	RIR_3319500	744	27.9801	24.6	Class C
A0A2H5UA78	Sulfite reductase (NADPH) hemoprotein beta-component	RIR_3320200	1644	29.1987	42.2
A0A2H5UA87	Non-specific serine/threonine protein kinase (EC 2.7.11.1)	RIR_3321000	800	27.0856	17.1	Class C
A0A2H5UA90	Chitin synthase regulatory factor chr2	RIR_3325900	1394	23.8623	8.5
A0A2H5UAA0	Serine/threonine protein kinase	RIR_3321800	558	25.686	19.2	Class C
A0A2H5UAE4	Ribosomal large subunit assembly and maintenance-related protein	RIR_3319100	396	23.4461	18.2
A0A2H5UAI0	Carbamoyl-phosphate synthase large subunit	RIR_3320100	1191	30.9155	63
A0A2H5UAL0	Uncharacterized protein	RIR_3336300	778	24.9815	16.5
A0A2H5UAL6	Peptidase S8/S53 domain-containing protein (Serine protease)	GLOIN_2v1534409 RIR_3336600	424	27.9873	26.7
A0A2H5UAS2	Btb/poz domain-containing protein 19-like	RIR_3340900	853	26.8257	24.6	Class C
A0A2H5UAT7	Kelch-like protein 17	RIR_3340800	456	30.7805	61.6	Class C
A0A2H5UAW3	Lipase/esterase family protein	RIR_3339700	460	27.9561	37
A0A2H5UAY4	Sequence orphan	RIR_3335400	398	25.2588	13.3
A0A2H5UB09	Dopa-dioxygenase	RIR_3347100	276	24.3347	14.9
A0A2H5UB13	Type II pantothenate kinase	RIR_3346700	769	23.9226	7.9
A0A2H5UB34	Fmn-binding split barrel	RIR_3349600	269	26.0036	18.6
A0A2H5UB38	Sulfate adenylyltransferase (EC 2.7.7.4) (ATP-sulfurylase) (Sulfate adenylate transferase) (SAT)	MET3 RIR_3348900	570	28.3336	38.4
A0A2H5UB48	Oligosaccharide translocation protein RFT1	RIR_3349800	621	23.9253	8.9
A0A2H5UB68	Eukaryotic translation initiation factor 2C	GLOIN_2v1662120 RIR_3351200	903	24.3835	11.8	RNAi-related
A0A2H5UB77	tRNA N6-adenosine threonylcarbamoyltransferase	KAE1 GLOIN_2v1721624 RIR_3352500	340	25.281	24.4
A0A2H5UB95	Hypothetical integral membrane protein	RIR_3352900	796	24.834	9.2
A0A2H5UBA2	Mynd domain protein	RIR_3350100	1402	23.3045	5.3
A0A2H5UBD8	Ran-binding protein 9-like isoform x2	RIR_3357000	212	24.1455	46.2
A0A2H5UBJ1	Alpha/beta fold family hydrolase (Alpha/beta hydrolase)	GLOIN_2v1661910 RIR_3349110	309	23.5409	13.3
A0A2H5UBU1	Patatin	RIR_3371200	1387	28.0225	32.2
A0A2H5UBX5	ATP-dependent RNA helicase sub2	RIR_3373400	419	30.3492	67.1
A0A2H5UBZ4	Sap domain protein	RIR_3375200	344	24.808	16.3
A0A2H5UC05	Benzoate 4-monooxygenase cytochrome P450	RIR_3375300	630	23.328	10
A0A2H5UC06	Saccharopepsin	RIR_3362000	374	31.8031	54
A0A2H5UCC0	Riboflavin aldehyde-forming enzyme	GLOIN_2v1711202 RIR_3373000	125	25.1666	32.8
A0A2H5UCD0	Protein SEY1 (EC 3.6.5.-)	SEY1 RIR_3373100	746	29.7921	40.9
A0A2H5UCD5	Nucleolin	RIR_3374700	514	26.7329	20.4
A0A2H5UCS1	Tyrosine-protein phosphatase non-receptor type 1	RIR_3384000	326	25.0538	39
A0A2H5UCU7	Chitin-binding type-1 domain-containing protein	GLOIN_2v1691740 RIR_3393900	186	24.7162	19.4
A0A2H5UD23	Aryl-alcohol dehydrogenase aad14 (Putative oxidoreductase)	GLOIN_2v1527339 RIR_3400700	384	31.8414	61.5
A0A2H5UD58	Sporulation associated protein	GLOIN_2v1733594 RIR_3409900	394	28.5617	53
A0A2H5UDQ6	Ubiquinol-cytochrome C reductase complex subunit	RIR_3425400	78	27.7099	37.2
A0A2H5UDQ7	Sporulation associated protein	RIR_3412300	346	26.7227	11.6
A0A2H5UDR1	Ccch-type zinc finger-containing protein	GLOIN_2v1589827 RIR_3426000	404	23.7817	14.4
A0A2H5UE73	Cell polarity protein mor2	RIR_3440200	2358	23.6757	4
A0A2H5UE82	3-hydroxybutyryl-CoA dehydrogenase	RIR_3441100	335	27.4318	29.3
A0A2H5UE88	Inositol-1-monophosphatase (EC 3.1.3.25)	RIR_3441500	319	26.7385	45.5
A0A2H5UE91	Ribosomal RNA-processing protein 4	GLOIN_2v1631076 RIR_3442000	311	23.1617	13.8
A0A2H5UEB8	Phosphoglucomutase	GLOIN_2v1630854 RIR_3444500	599	28.755	53.6
A0A2H5UEC1	IQ domain-containing GTPase activating protein	RIR_3437500	1202	25.5213	11
A0A2H5UEJ6	3-isopropylmalate dehydrogenase (EC 1.1.1.85)	RIR_3437600	1066	31.2284	59.3
A0A2H5UEP4	Coatomer subunit gamma	RIR_3454600	713	29.0853	39.7
A0A2H5UER9	Guanylate-binding protein 4	RIR_3443900	685	27.6745	35.6
A0A2H5UET1	Periodic tryptophan protein 2	GLOIN_2v1623029 RIR_3458400	853	23.7164	7.2
[truncated: 1,073 more rows]

## Sheet: Sheet 1 - Legend
Legend
Group
RNAi-related
DNA methylation
Sex and meiosis
Putative effector
Class C
Histone and histone modification
